# Supplementary material
Source: PubMed Central journal article supplement (PMC4655184)

# RGASQAGMTGYGRPRQI, charge 4

Ms2 Spectrum (Scan: 5942, Raw: CPTAC\_OT\_Pep\_JB\_5427\_0min\_4May12\_Legolas\_11-07-64)

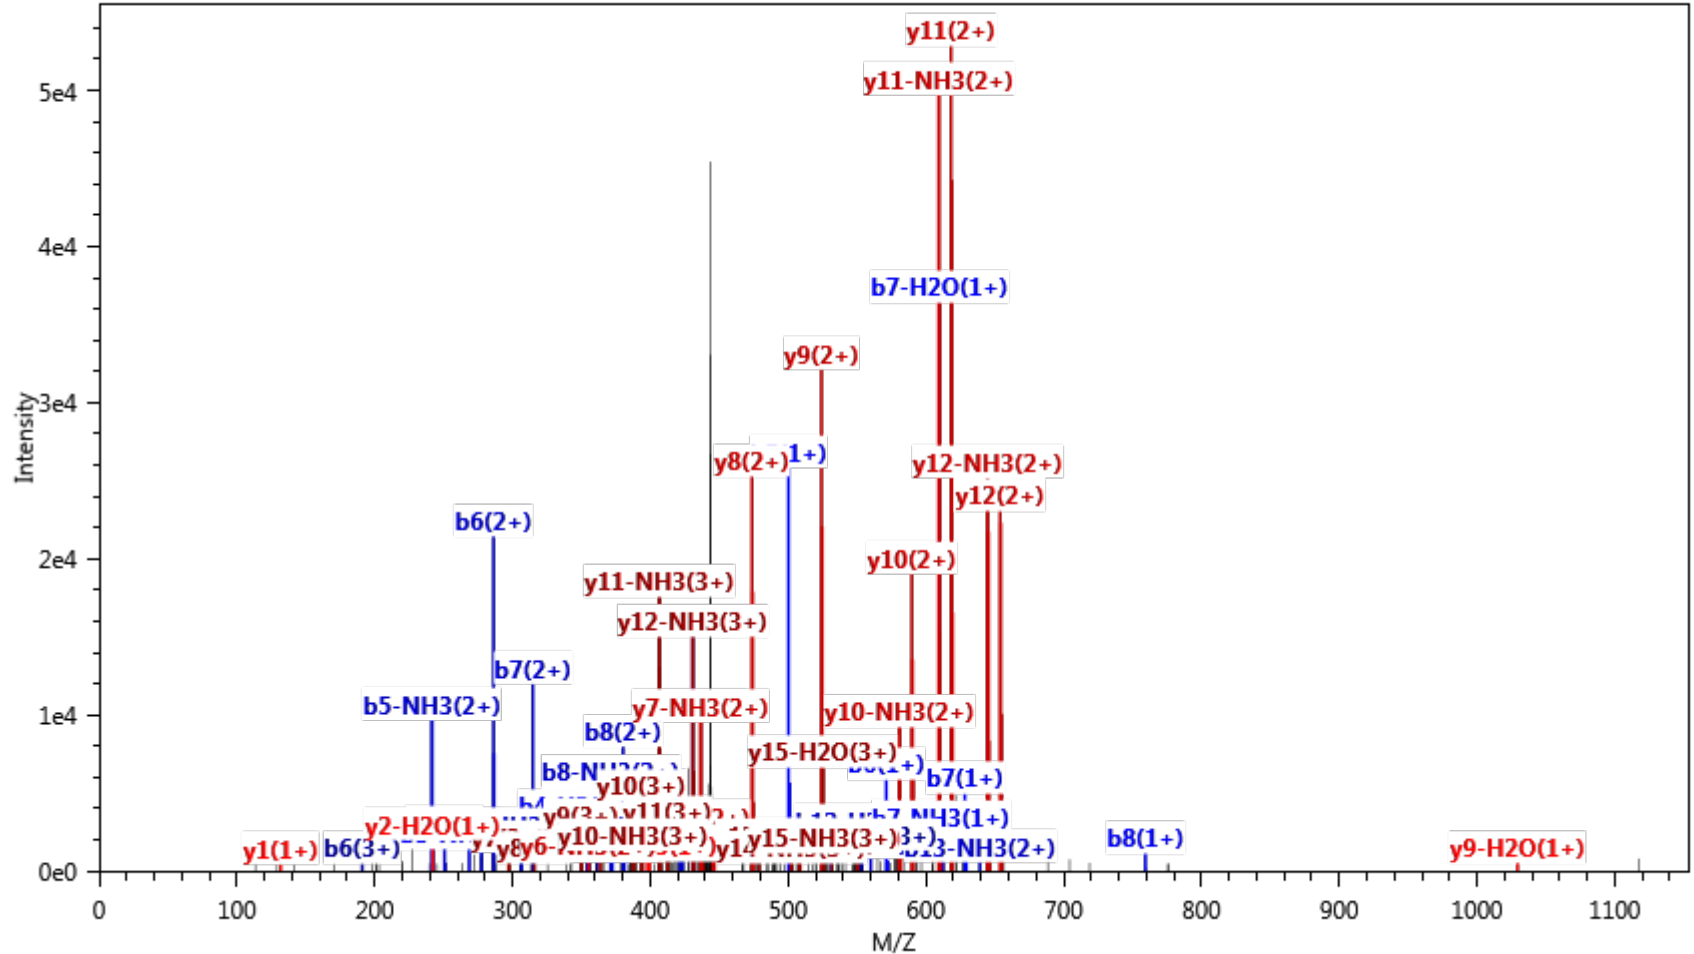

# SPPRRRSPRRRSFSRSR, charge 4

Ms2 Spectrum (Scan: 6314, Raw: CPTAC\_OT\_Pep\_JB\_5427\_0min\_4May12\_Legolas\_11-07-64)

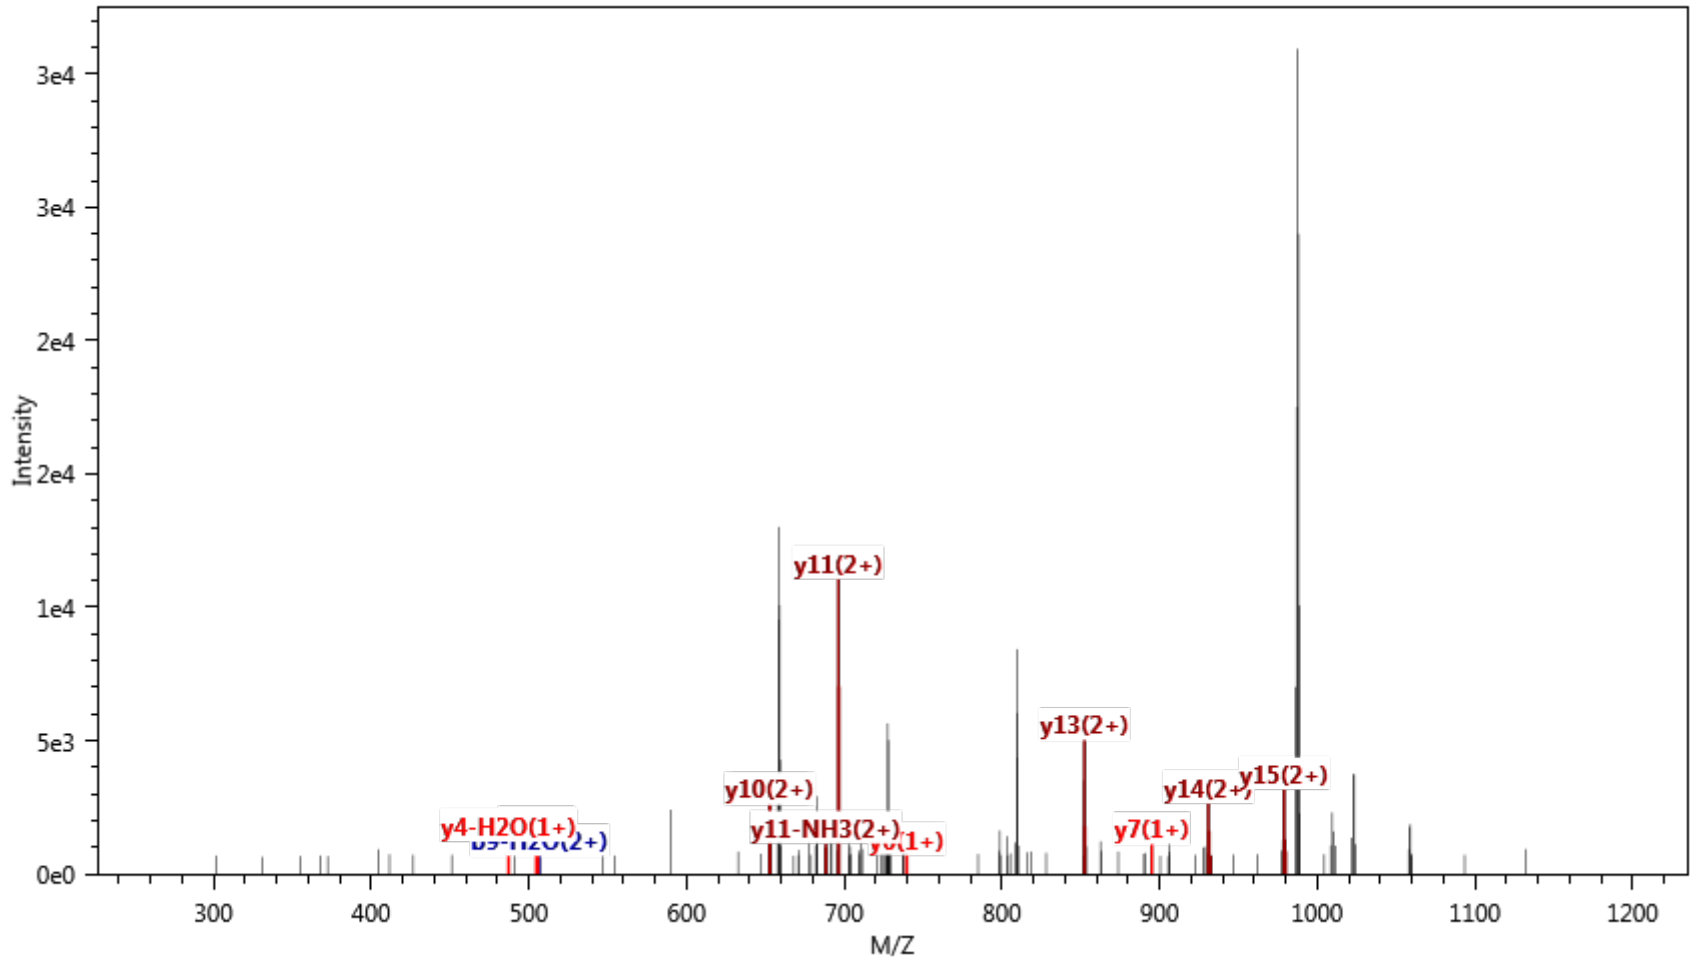

# SFGDLSTPDAVMGNPKVKAHGKKVLGAFSDGLAHL DNL, charge 4

Ms2 Spectrum (Scan: 17443, Raw: CPTAC\_OT\_Pep\_JB\_5427\_0min\_4May12\_Legolas\_11-07-64)

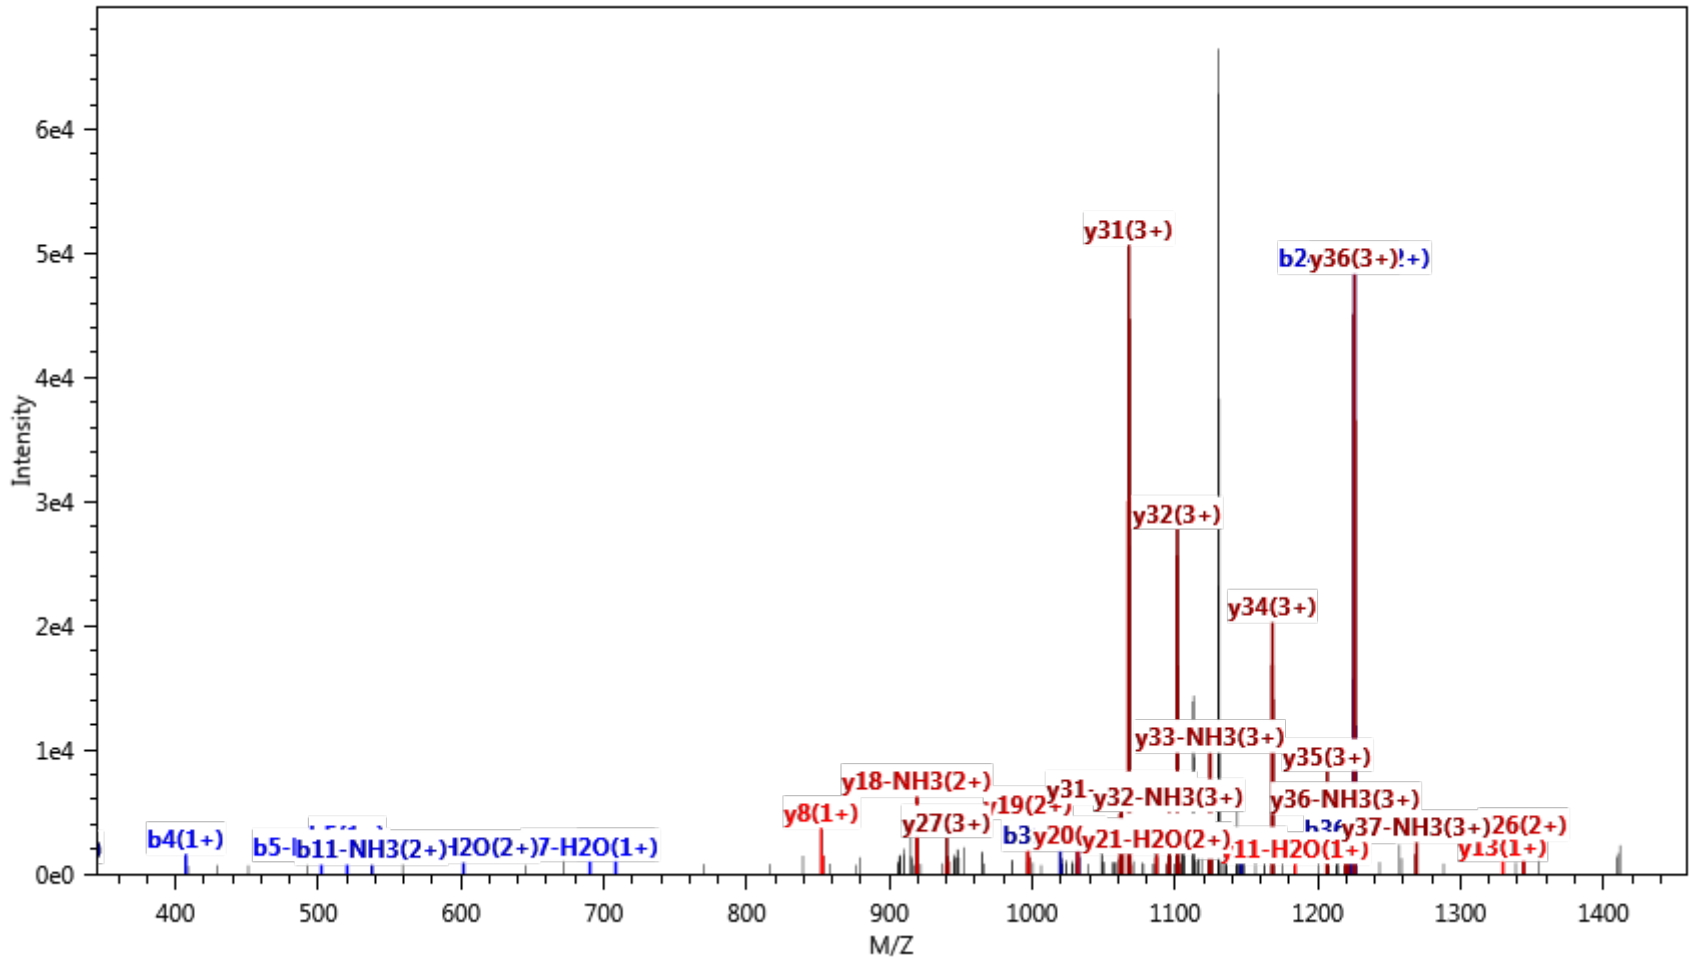

# YVQTVKSSKGGPGSA, charge 3

Ms2 Spectrum (Scan: 1770, Raw: CPTAC\_OT\_Pep\_JB\_5427\_0min\_4May12\_Legolas\_11-07-64)

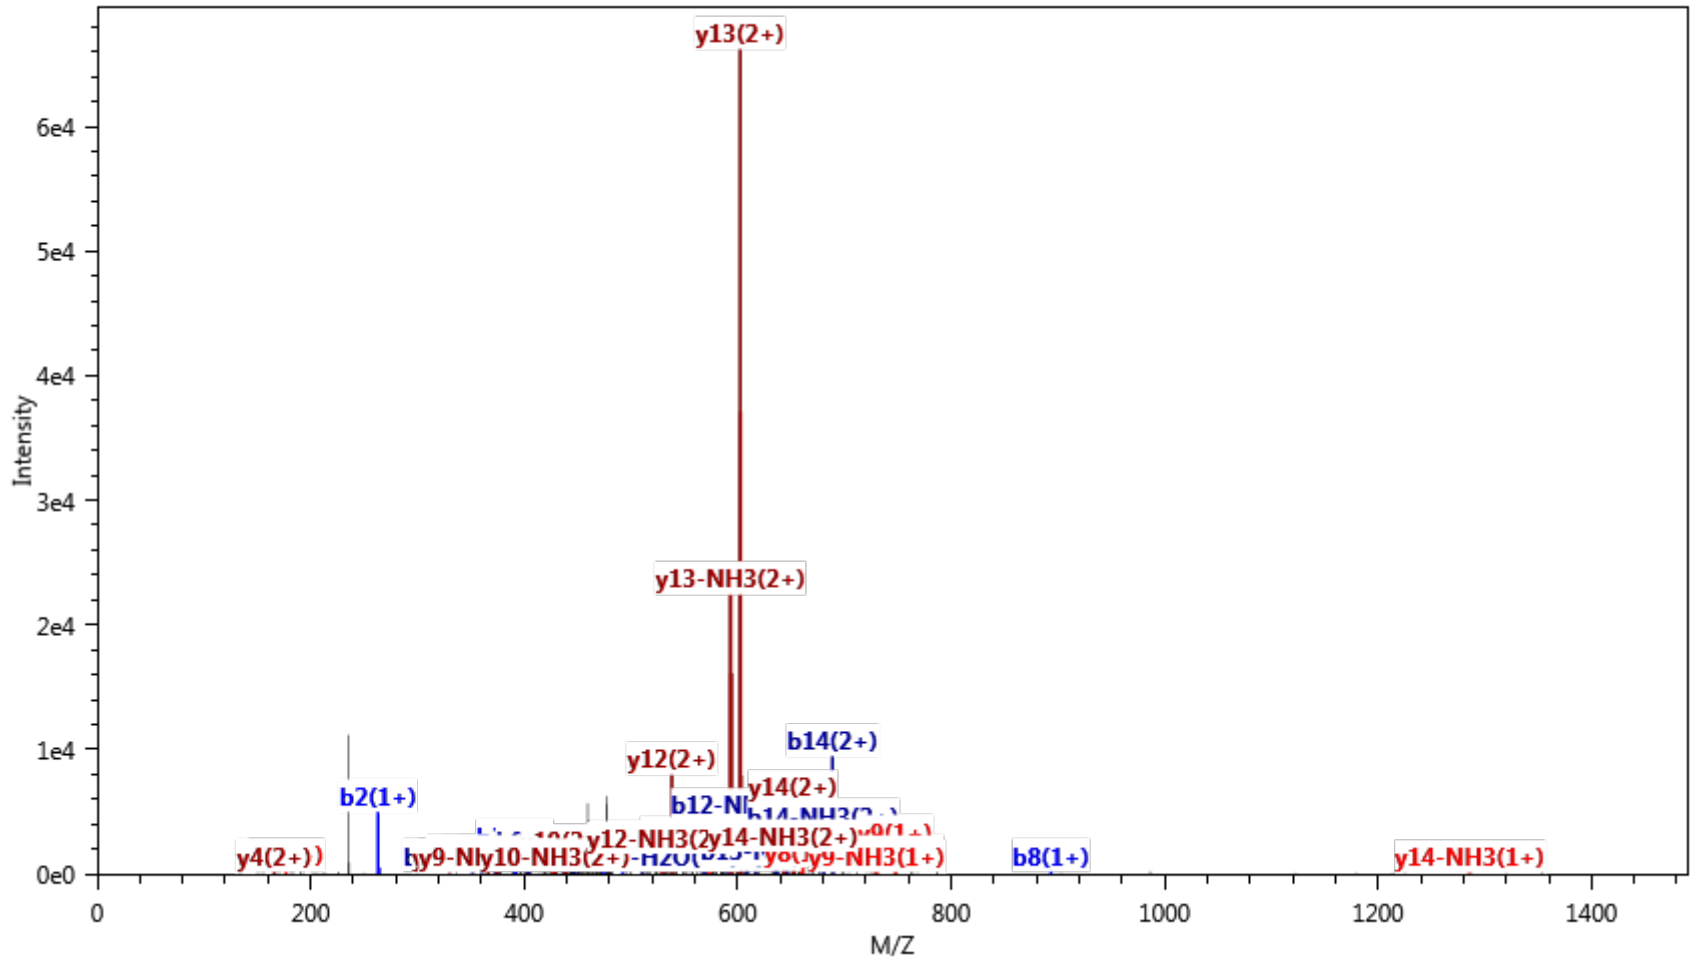

# GVRGYLDKLEPSKITKFENA, charge 4

Ms2 Spectrum (Scan: 11722, Raw: CPTAC\_OT\_Pep\_JB\_5427\_5min\_4May12\_Legolas\_11-07-64)

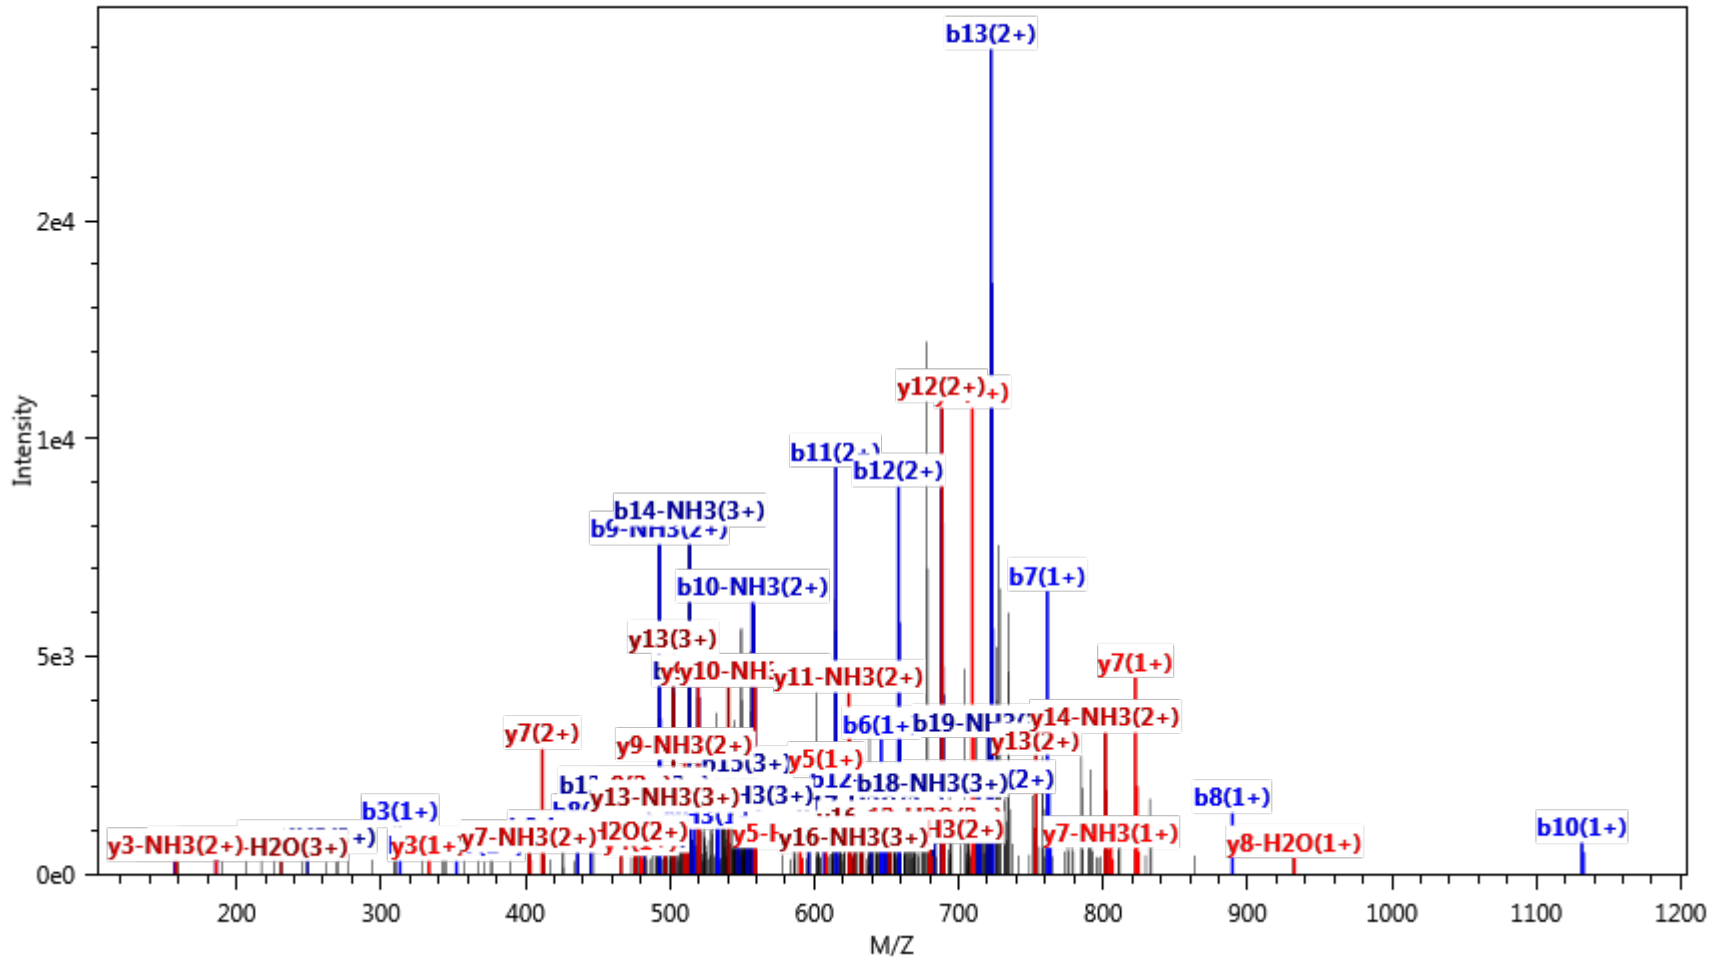

# SSTMANNGLFSLVARKLSRP, charge 4

Ms2 Spectrum (Scan: 16253, Raw: CPTAC\_OT\_Pep\_JB\_5427\_5min\_4May12\_Legolas\_11-07-64)

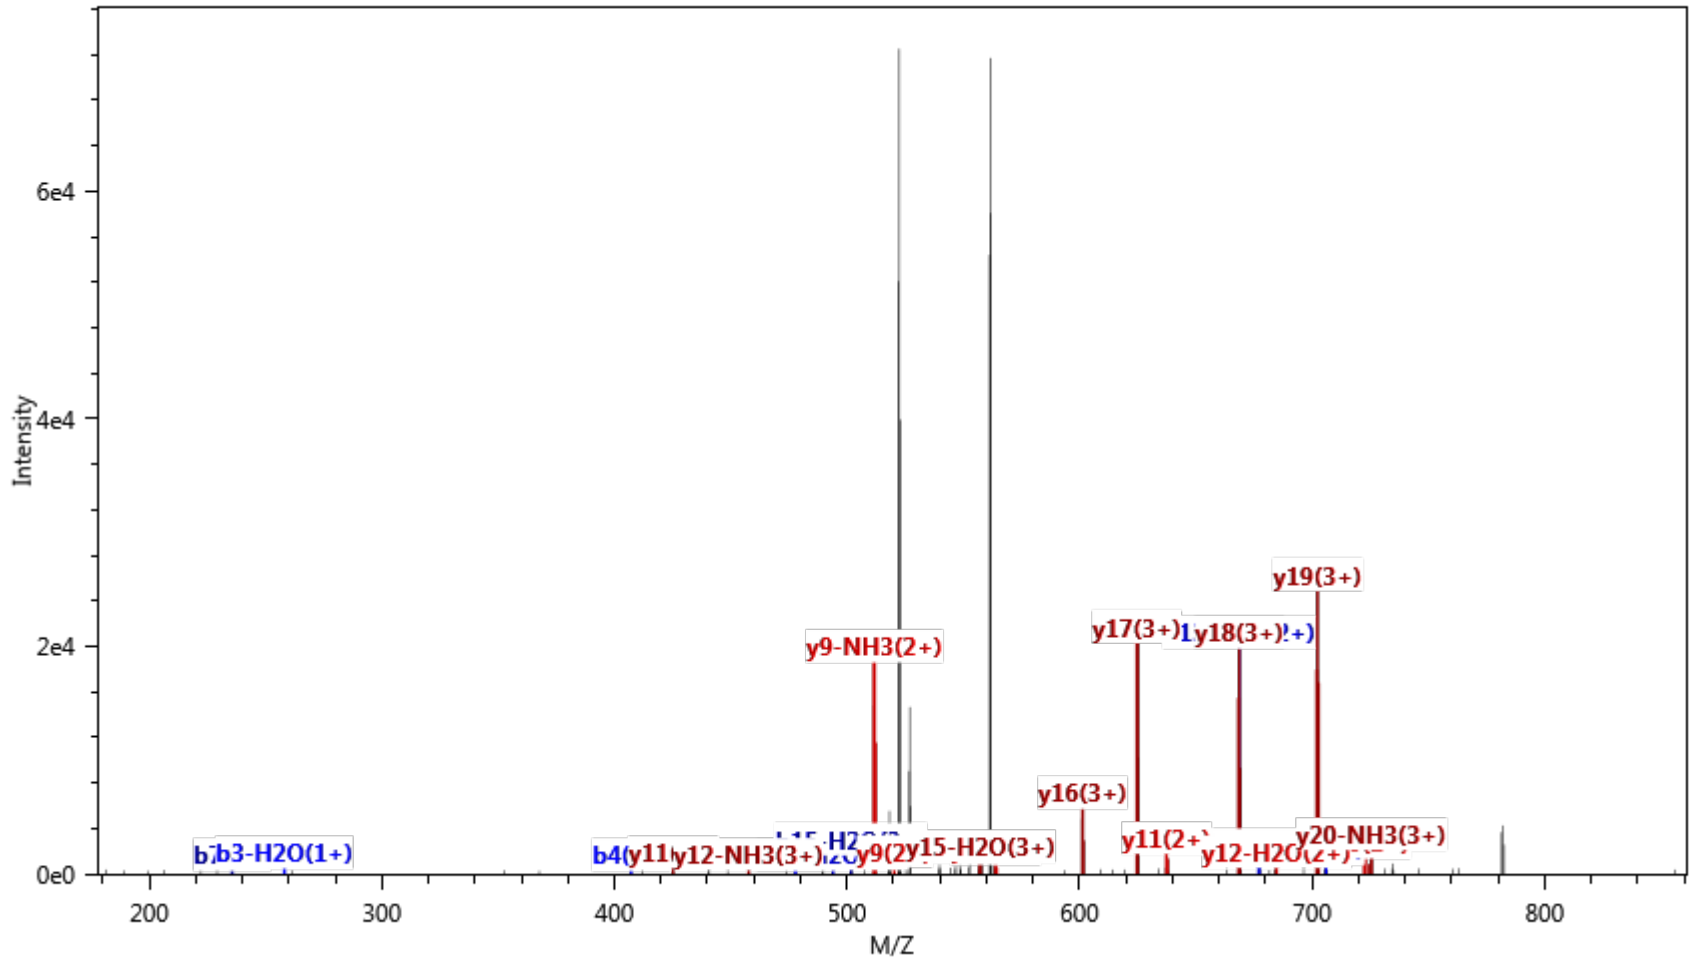

# VGGEALGRL, charge 2

Ms2 Spectrum (Scan: 10139, Raw: CPTAC\_OT\_Pep\_JB\_5427\_60min\_4May12\_Legolas\_11-07-64)

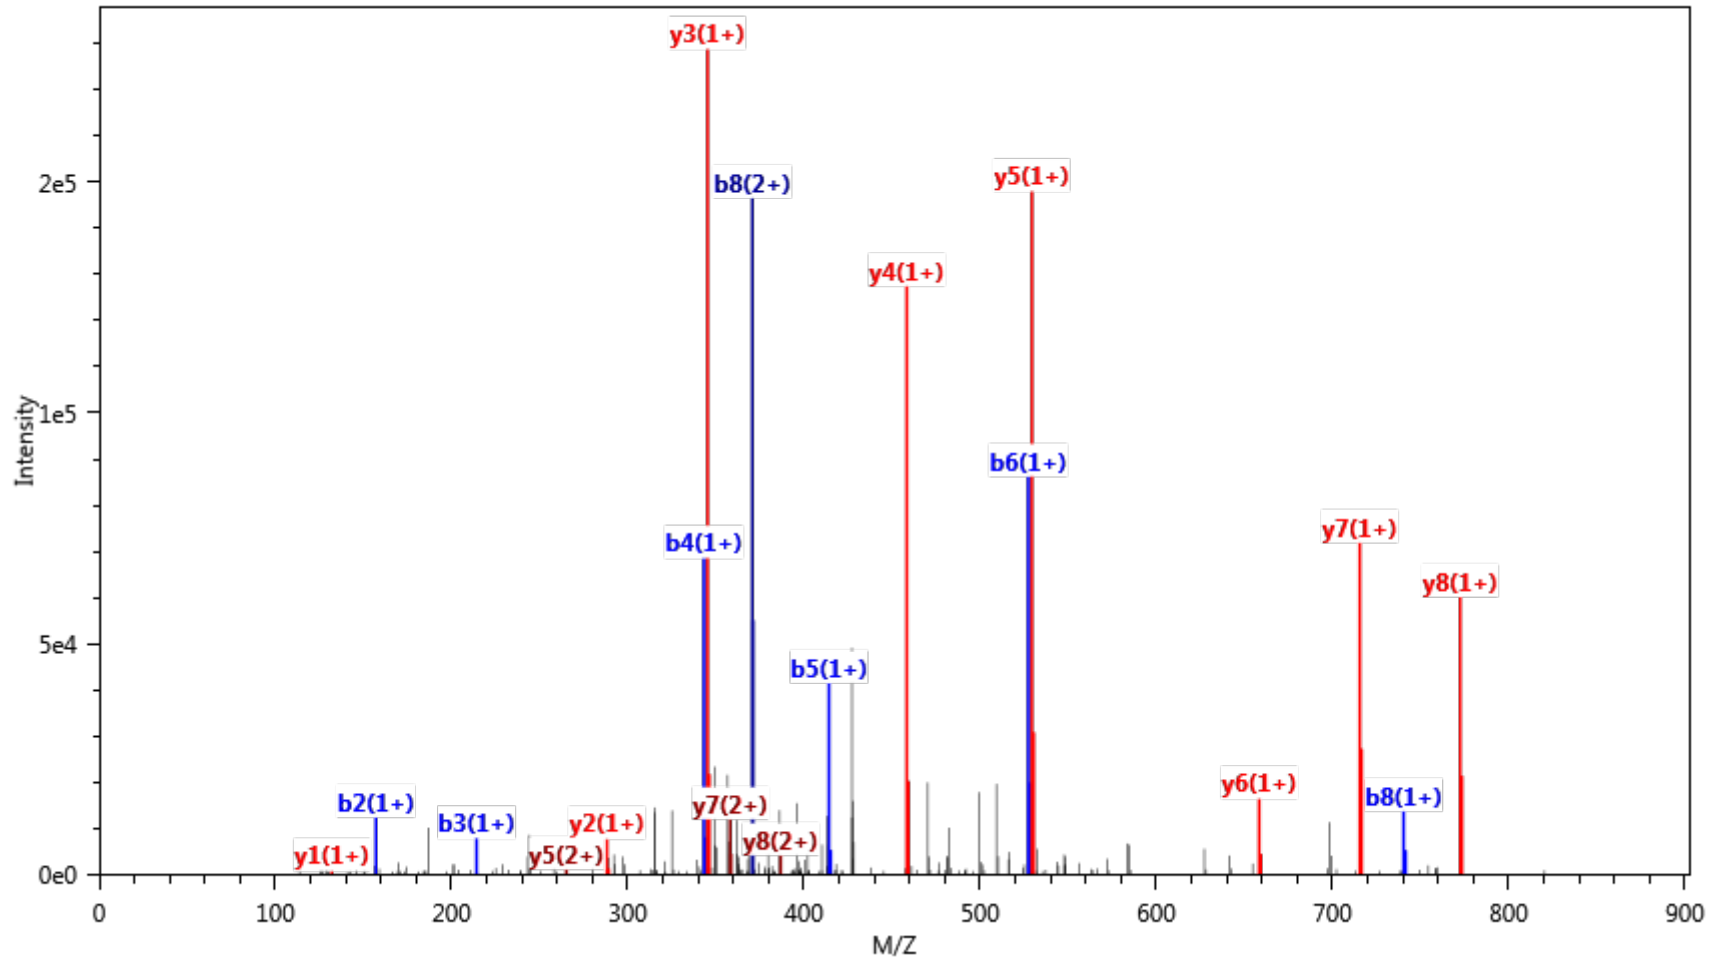

# DLQNNDISELRKDDFKGLQHL, charge 4

Ms2 Spectrum (Scan: 13229, Raw: CPTAC\_OT\_Pep\_JB\_5429\_0min\_4May12\_Legolas\_11-07-64)

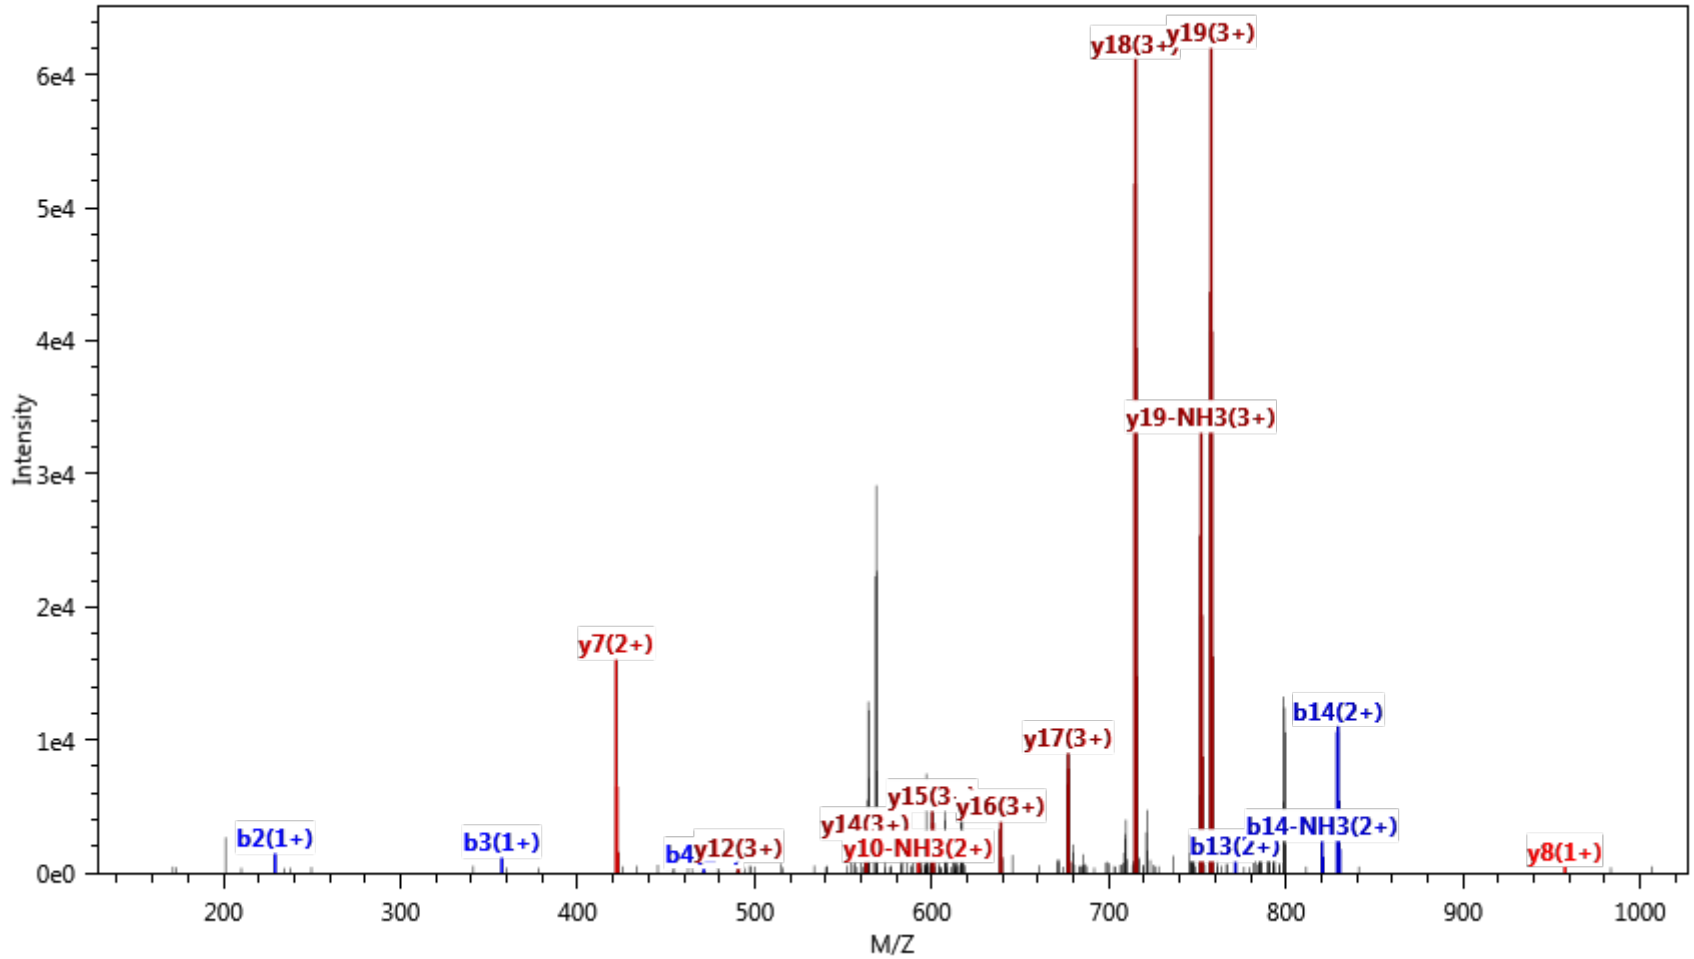



# PQPDLTKLHQLA, charge 2

Ms2 Spectrum (Scan: 12823, Raw: CPTAC\_OT\_Pep\_JB\_5429\_0min\_4May12\_Legolas\_11-07-64)

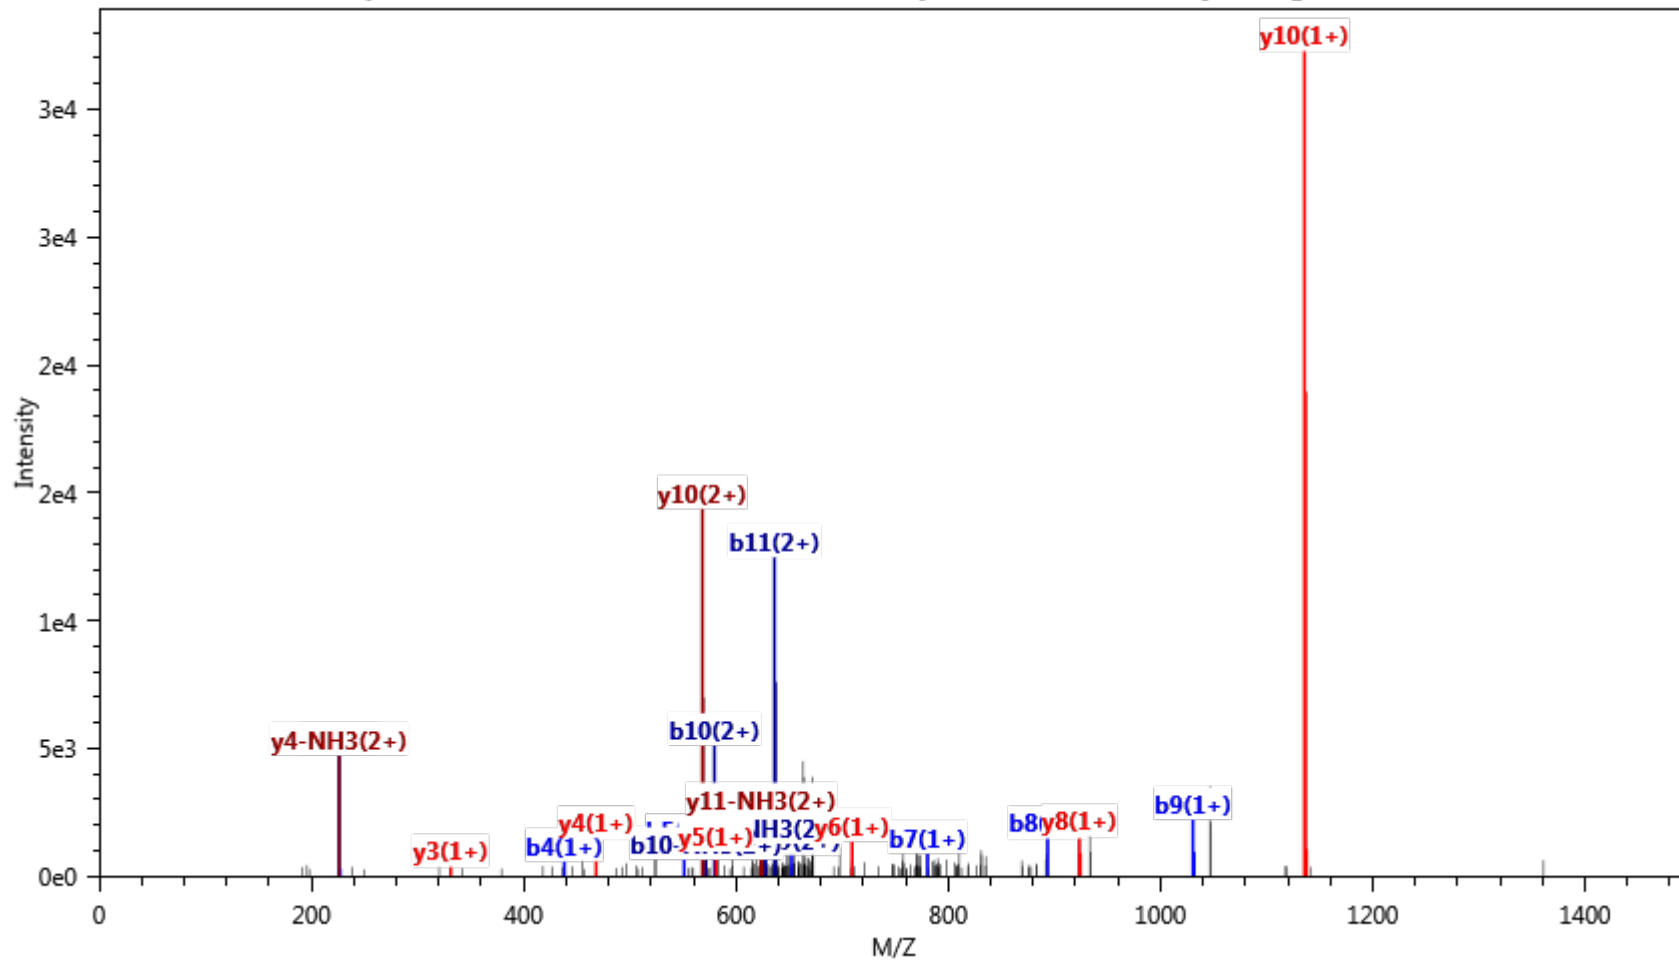

QGKKAEGAQNQGKKAEGAQNQGKKAEGAQN, charge 4

Ms2 Spectrum (Scan: 381, Raw: CPTAC\_OT\_Pep\_JB\_5429\_0min\_4May12\_Legolas\_11-07-64)

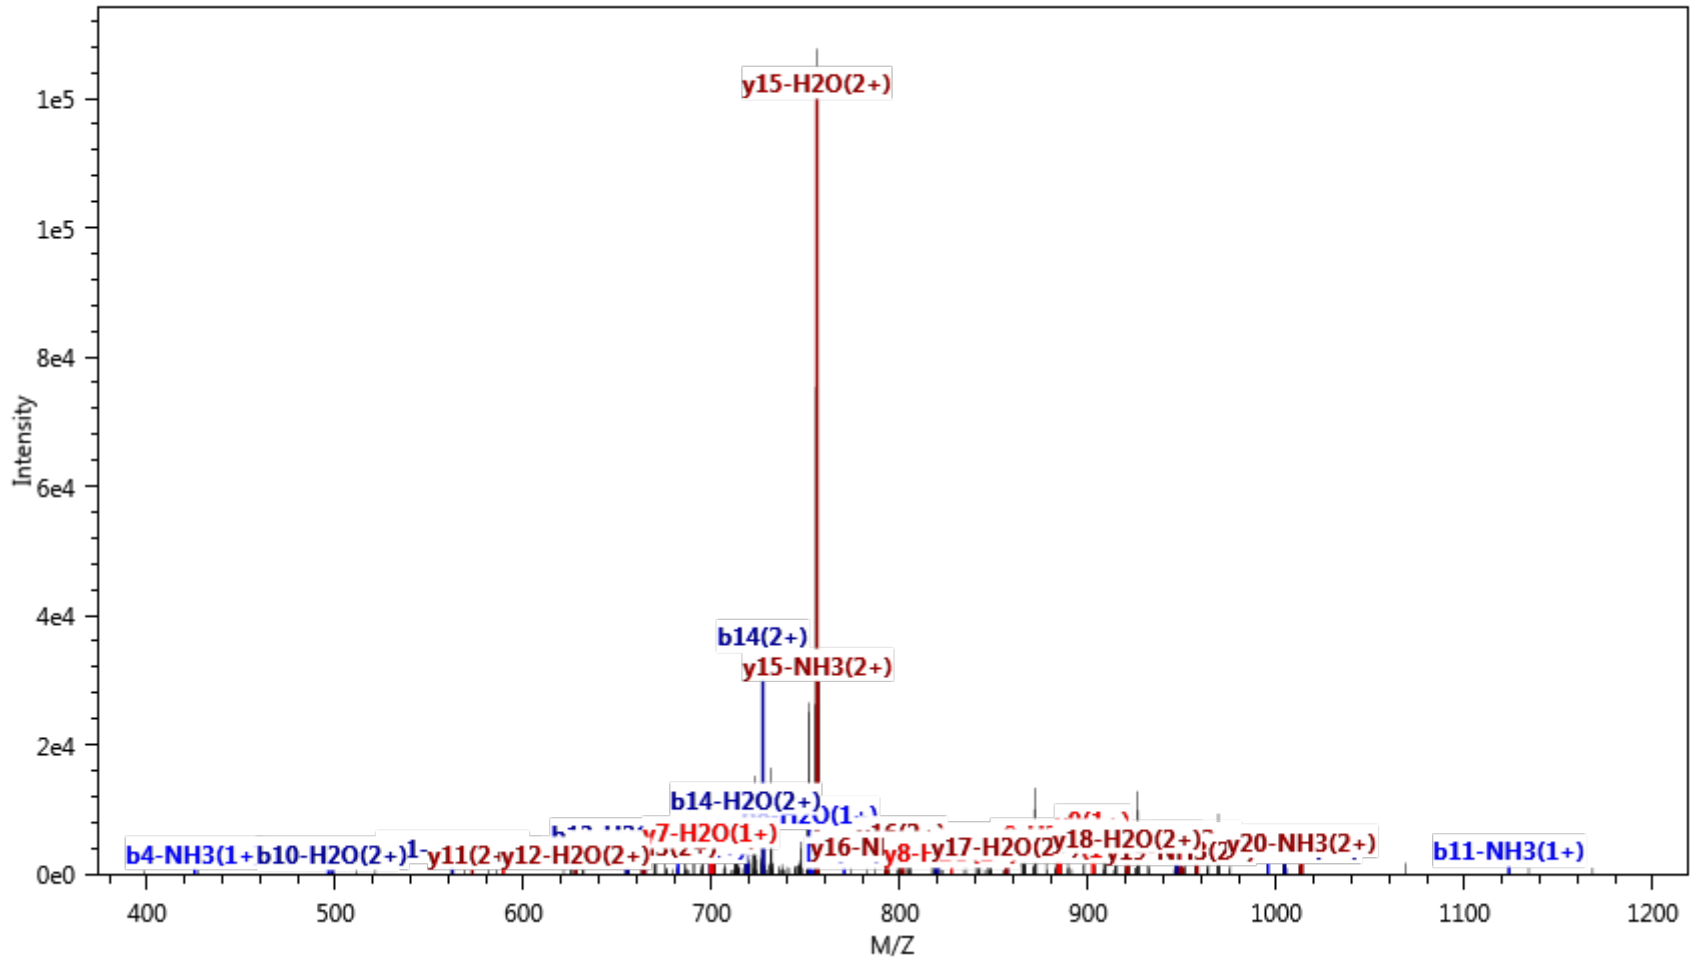

# VKM\*LPDKDCRYAL, charge 3

Ms2 Spectrum (Scan: 8265, Raw: CPTAC\_OT\_Pep\_JB\_5429\_0min\_4May12\_Legolas\_11-07-64)

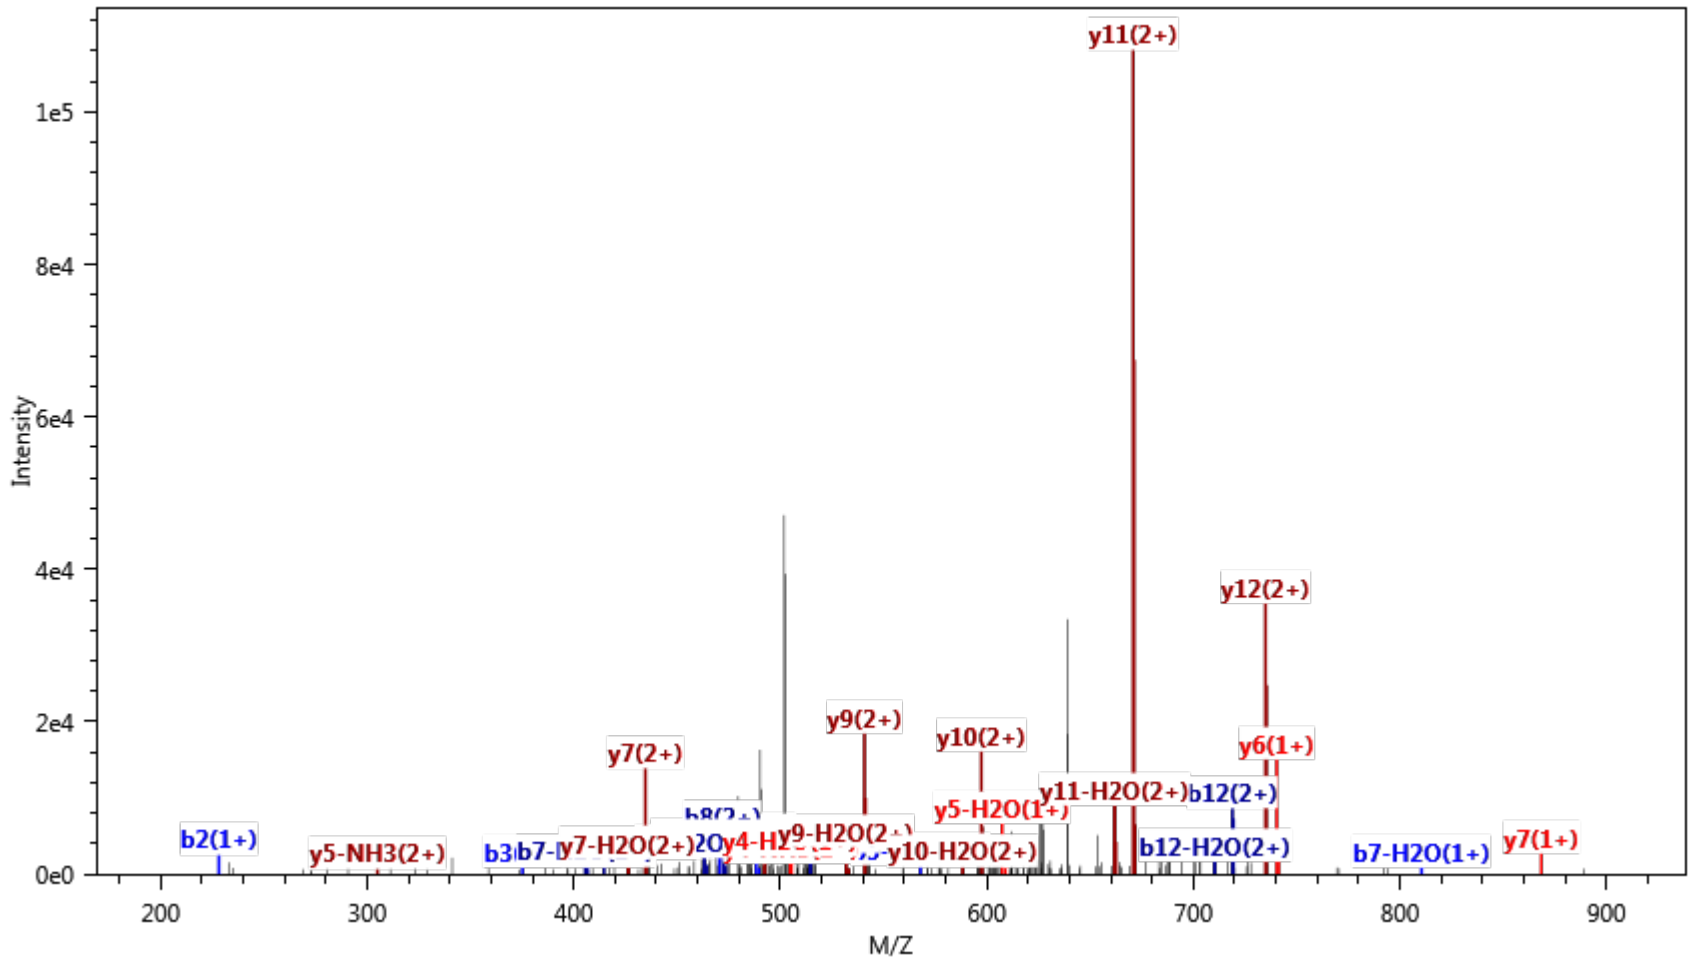

# FDQLHEGAKALDVGSGGILTA, charge 3

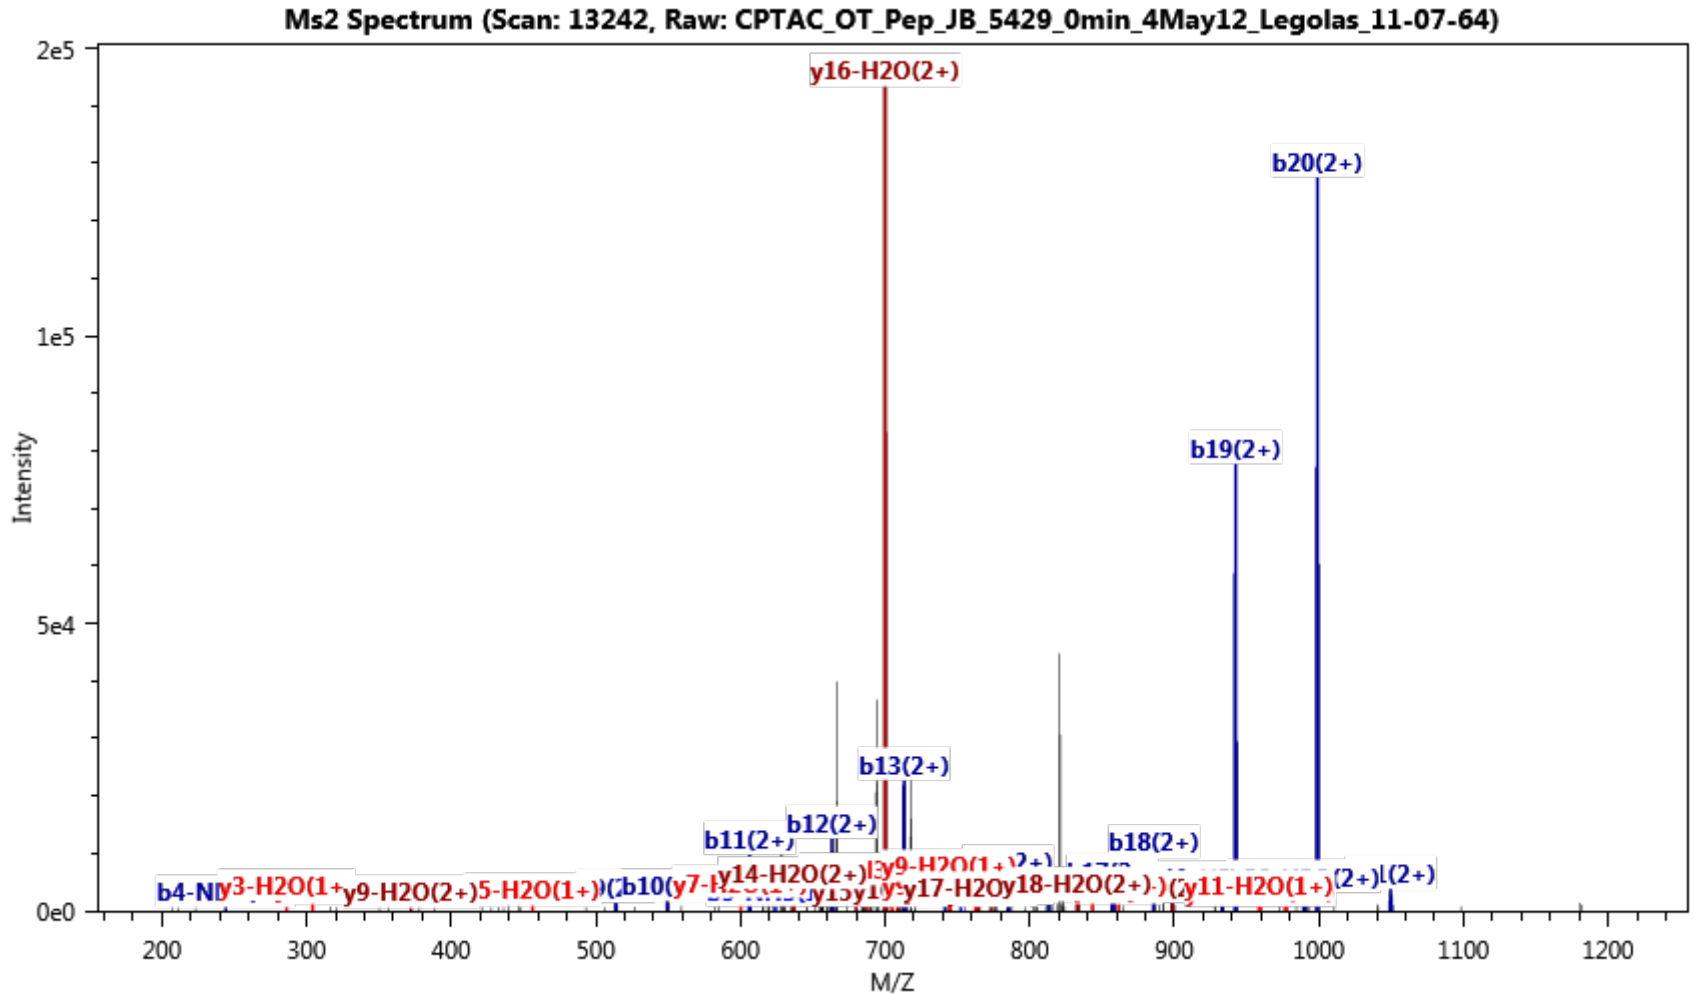

# NYLNTLSTALNILEK, charge 3

Ms2 Spectrum (Scan: 11639, Raw: CPTAC\_OT\_Pep\_JB\_5429\_30min\_4May12\_Legolas\_11-07-64)

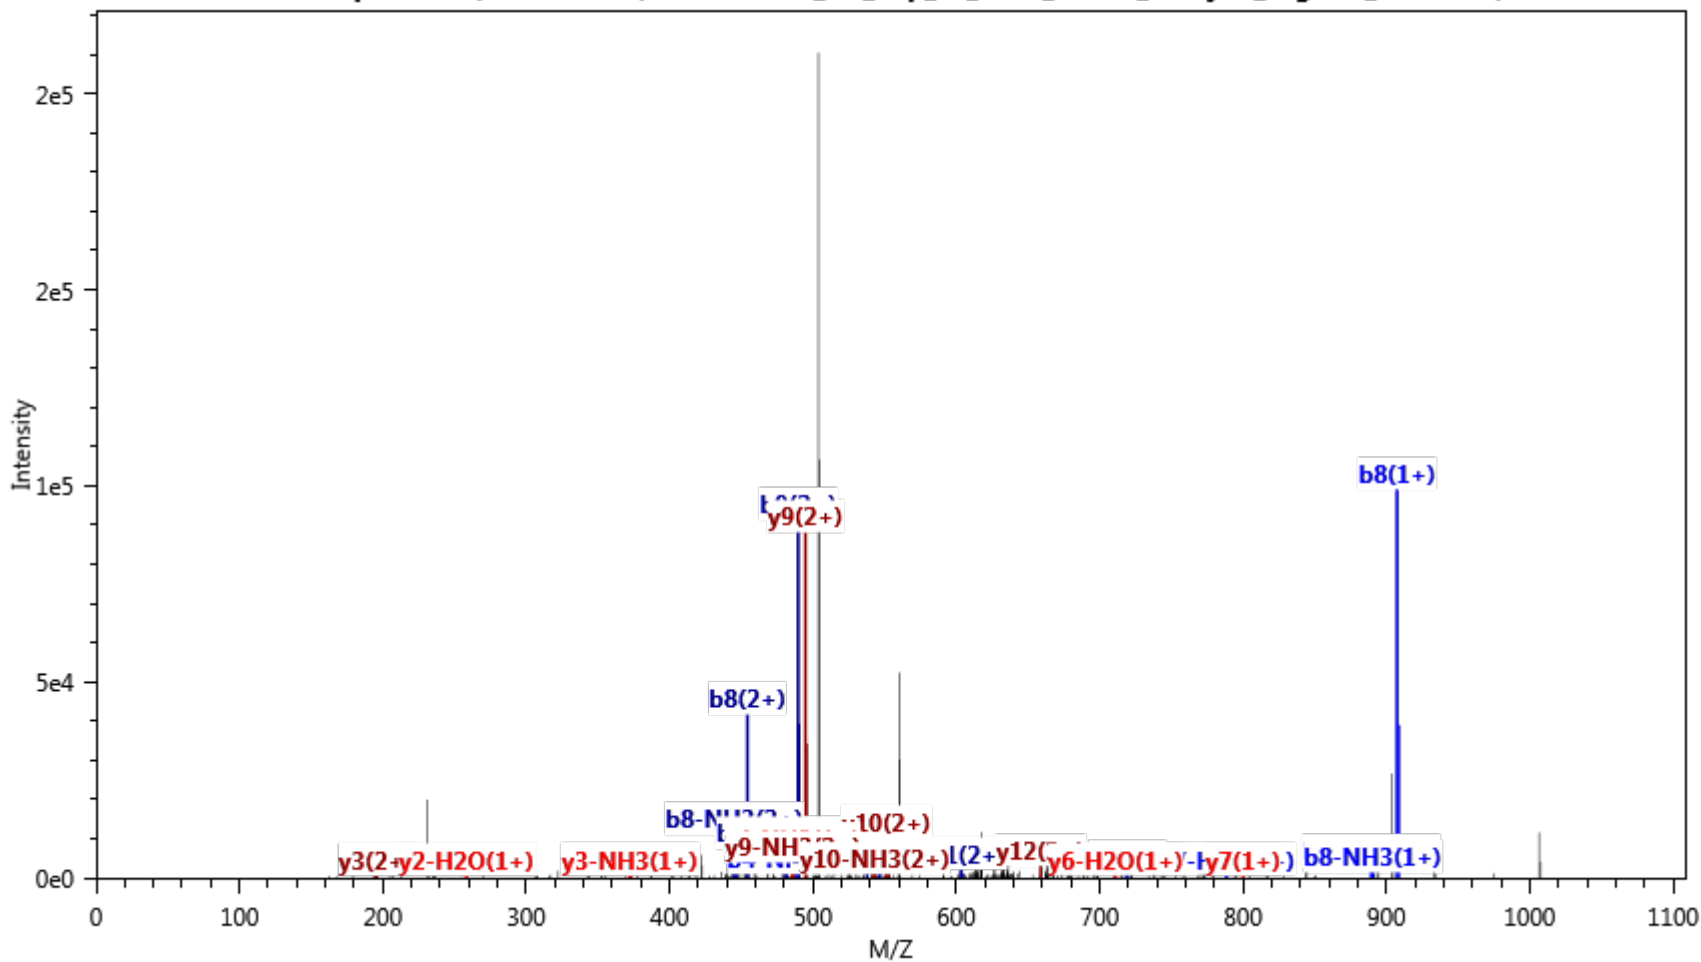

# AAHLPAEFTPAVHASLDKFLASVSTVLTSK, charge 5

Ms2 Spectrum (Scan: 22490, Raw: CPTAC\_OT\_Pep\_JB\_5429\_30min\_4May12\_Legolas\_11-07-64)

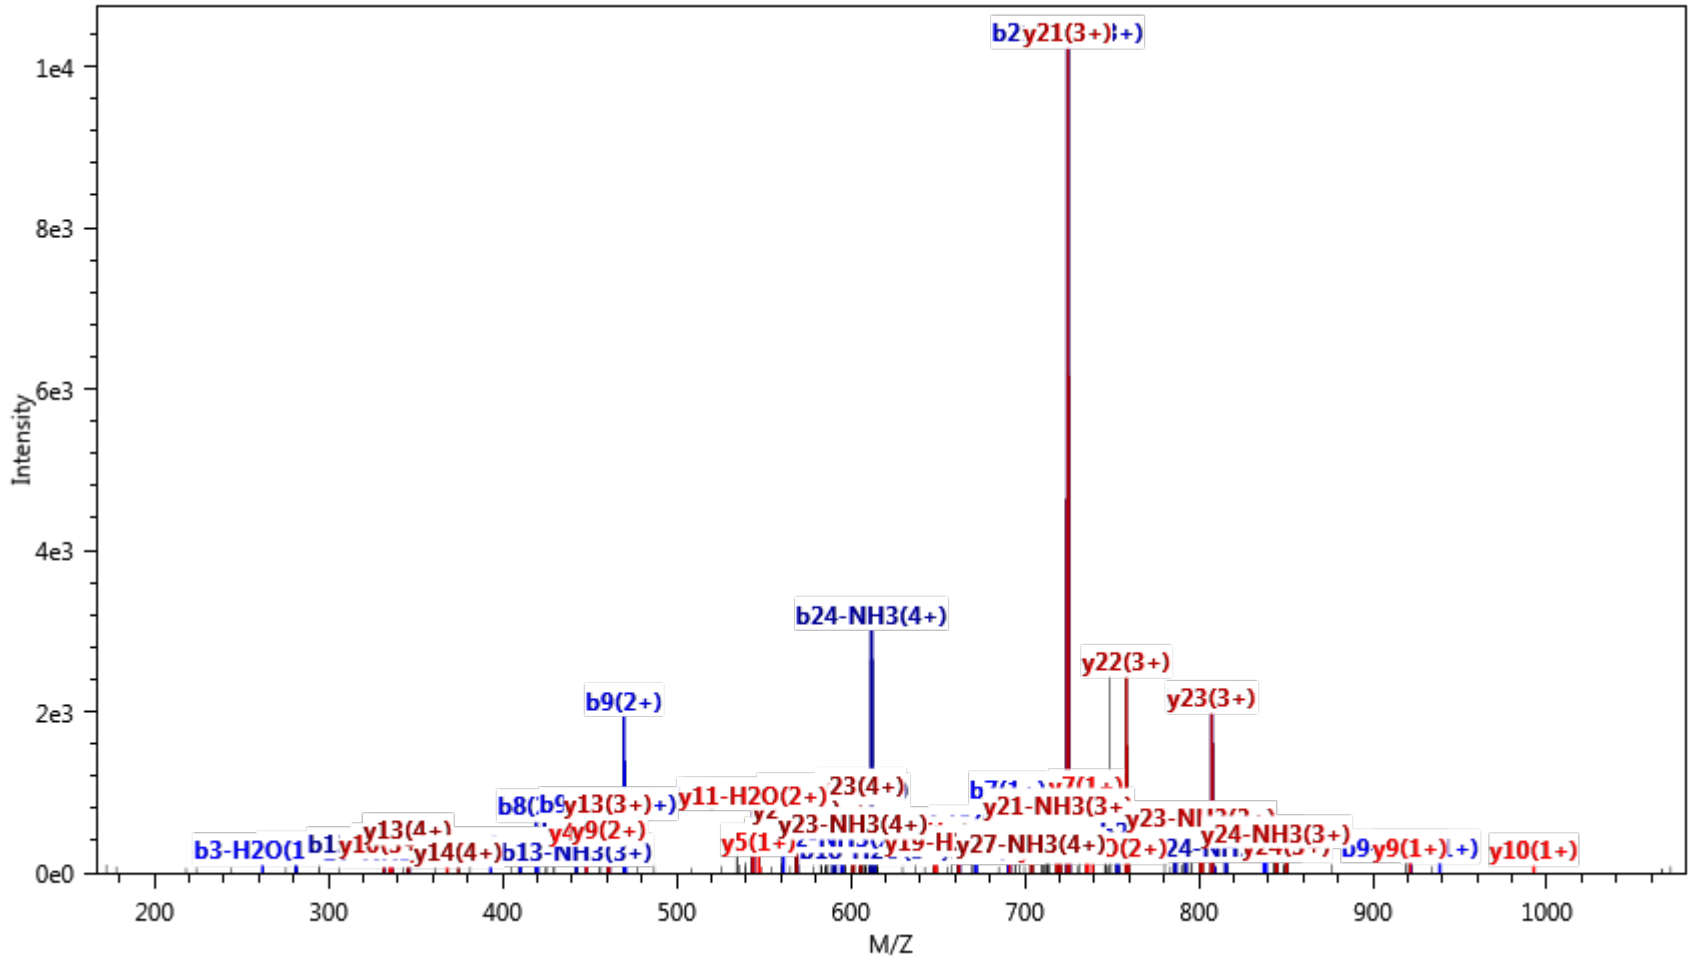

# REEPVDSRTPVTER, charge 3

Ms2 Spectrum (Scan: 3135, Raw: CPTAC\_OT\_Pep\_JB\_5429\_30min\_4May12\_Legolas\_11-07-64)

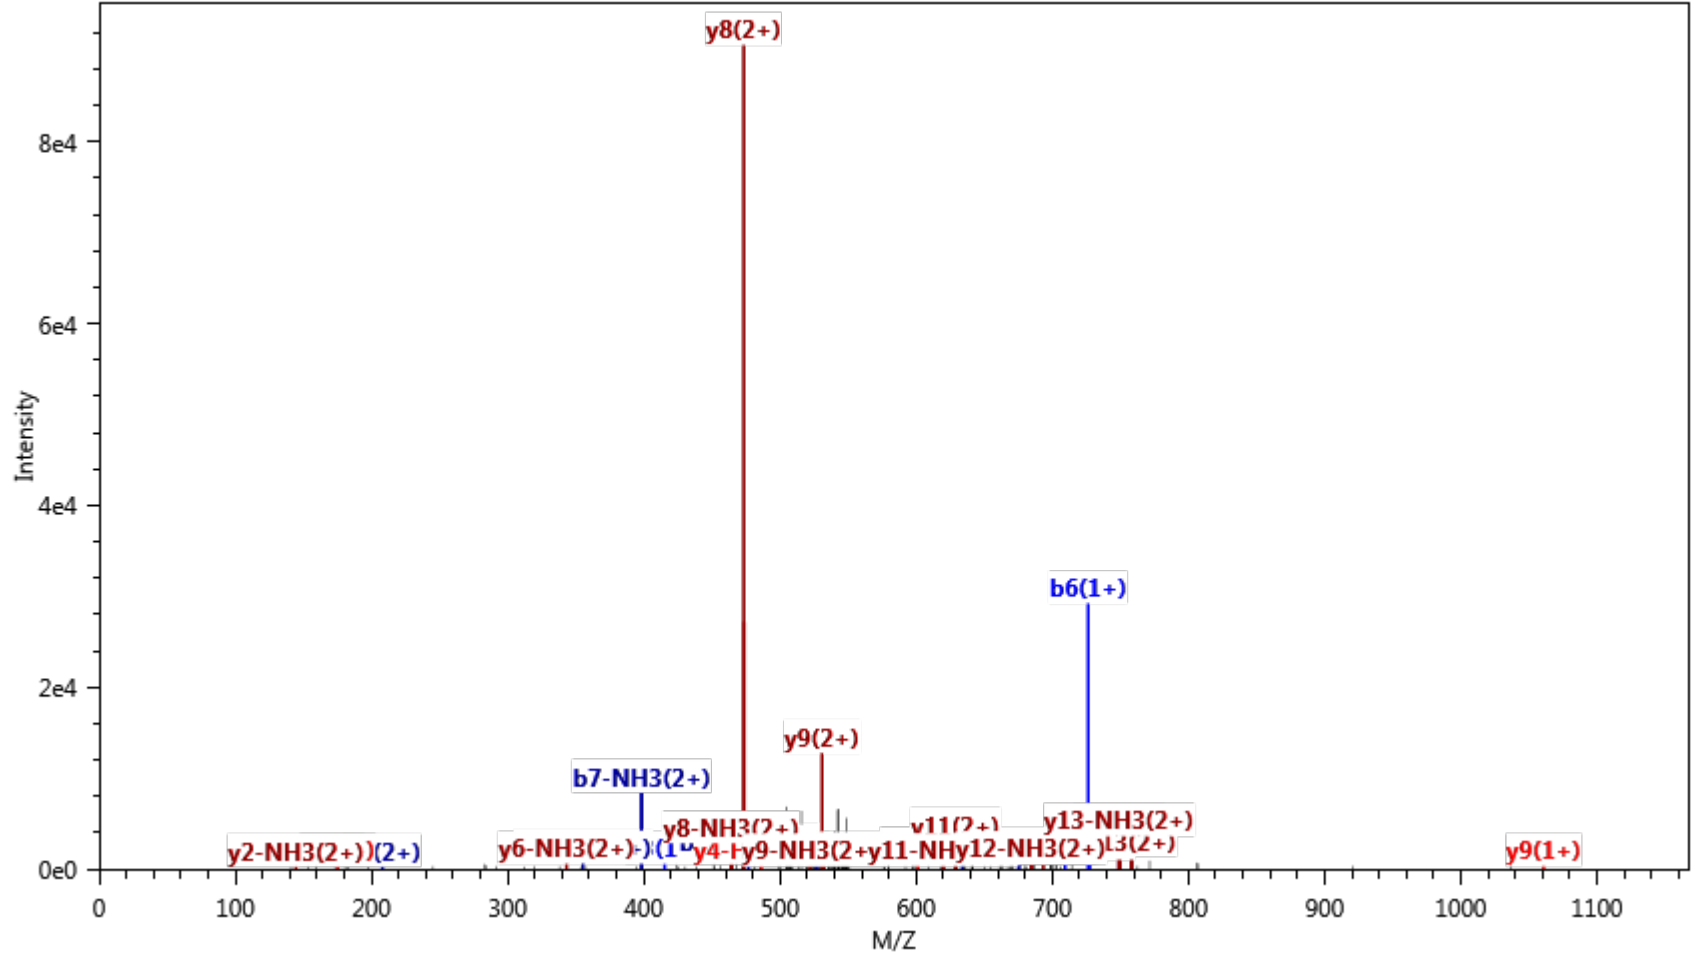

# GPGASLGTGYDRKDYV, charge 3

Ms2 Spectrum (Scan: 8383, Raw: CPTAC\_OT\_Pep\_JB\_5429\_30min\_4May12\_Legolas\_11-07-64)

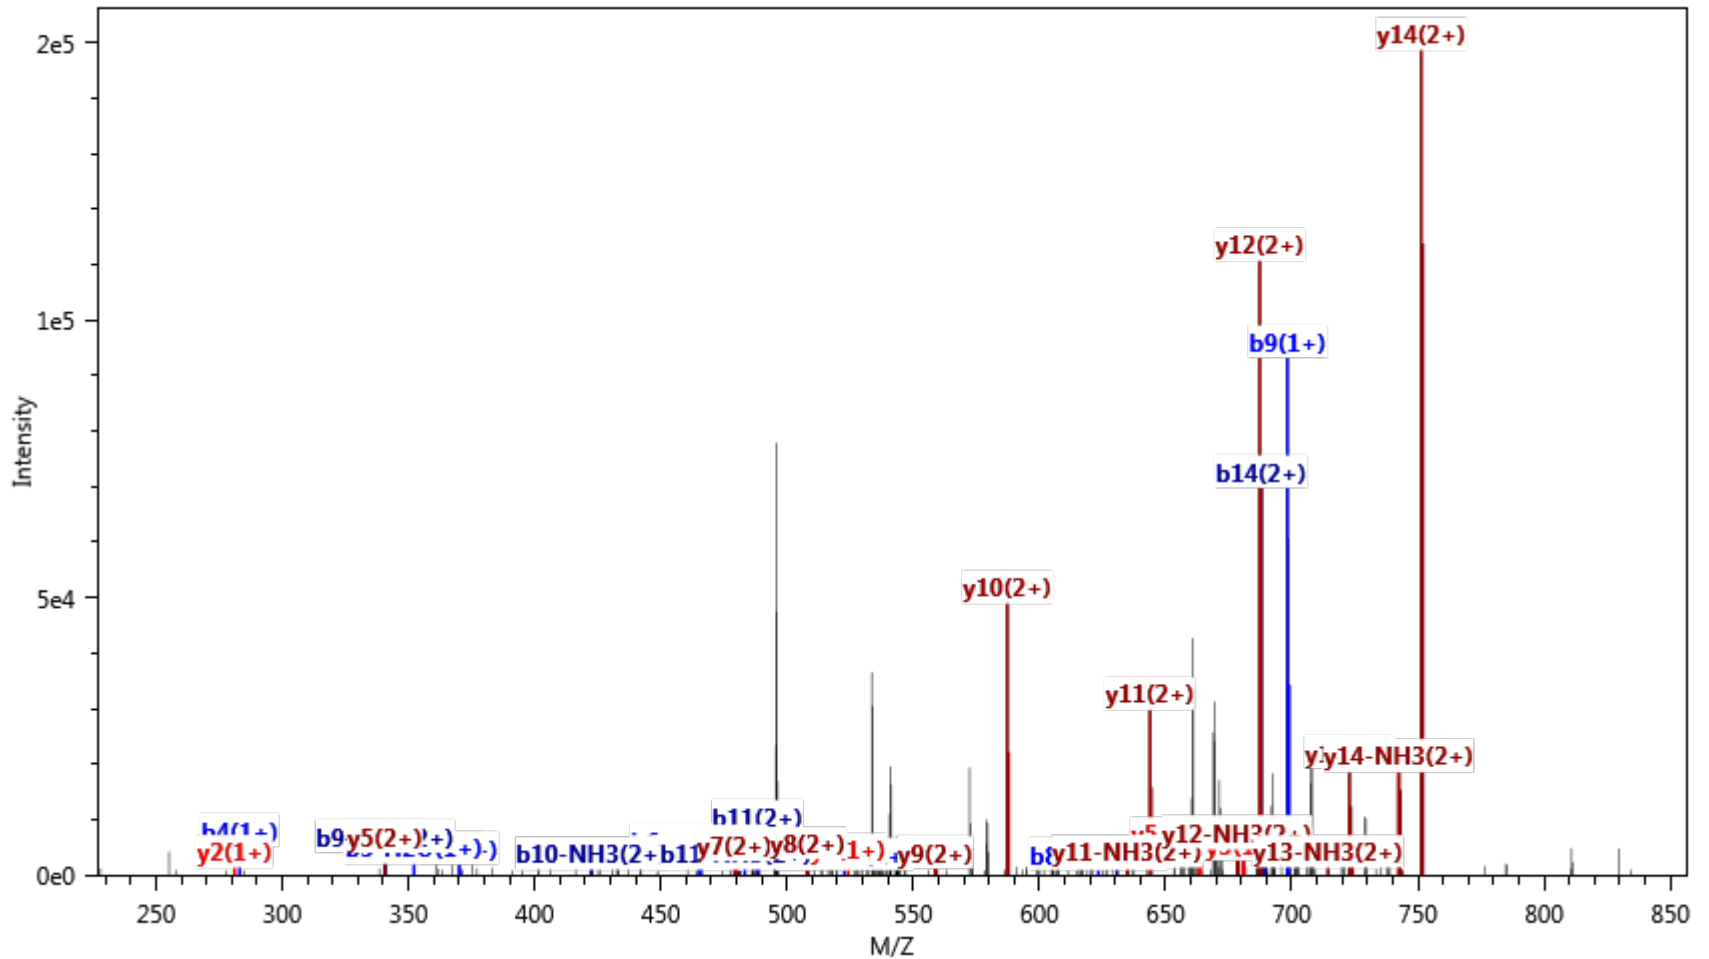



# AVVPSKRQRVSGNTS, charge 3

Ms2 Spectrum (Scan: 1213, Raw: CPTAC\_OT\_Pep\_JB\_5429\_30min\_4May12\_Legolas\_11-07-64)

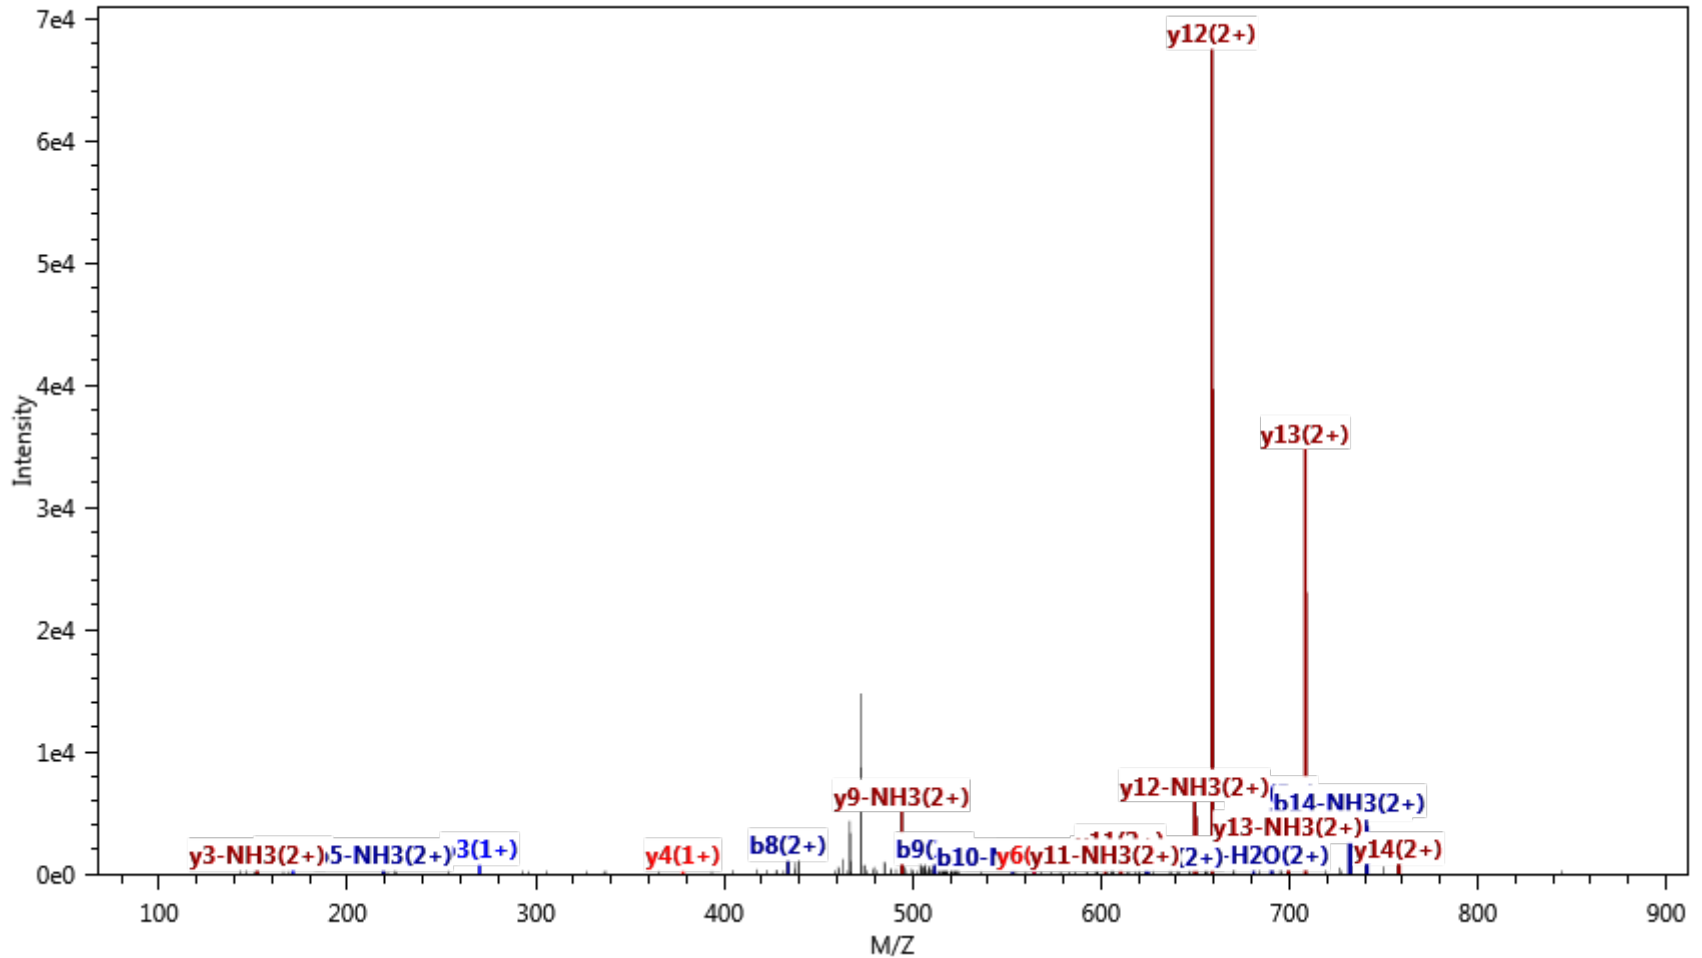

# HVDPENFLLGNVL, charge 2

Ms2 Spectrum (Scan: 17820, Raw: CPTAC\_OT\_Pep\_JB\_5429\_30min\_4May12\_Legolas\_11-07-64)

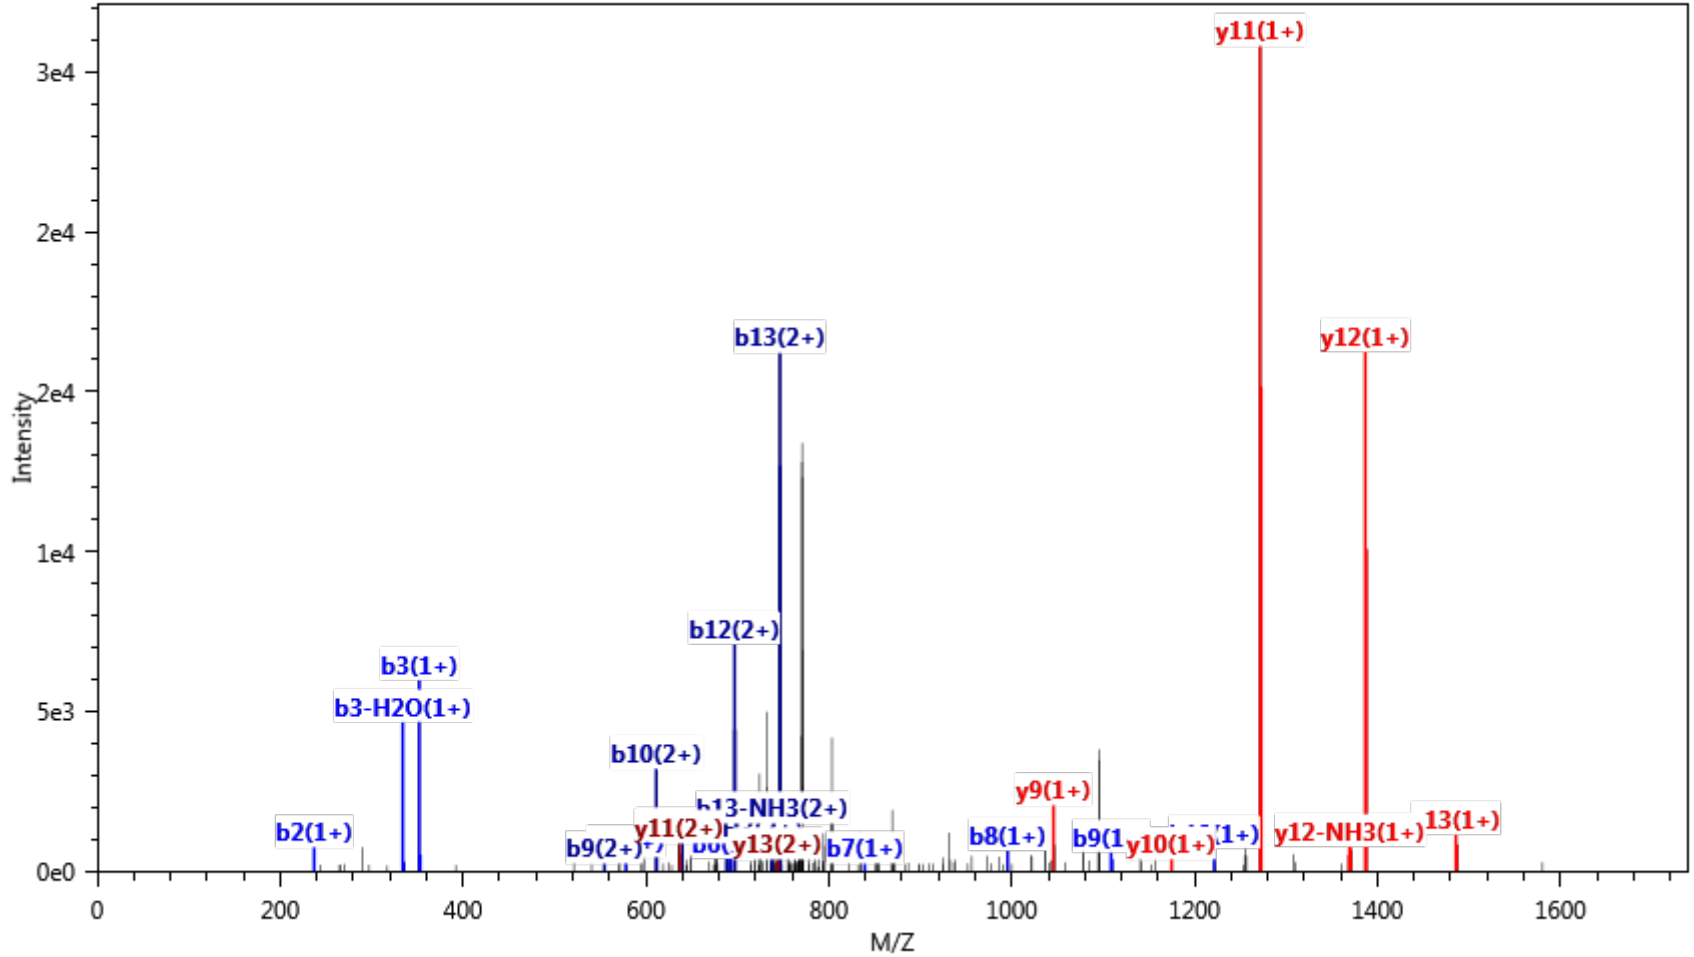

PSYPVPWLAENETSFKKTLEPTLSQRSIQNANSMEKEKK, charge 7

Ms2 Spectrum (Scan: 8379, Raw: CPTAC\_OT\_Pep\_JB\_5429\_5min\_4May12\_Legolas\_11-07-64)

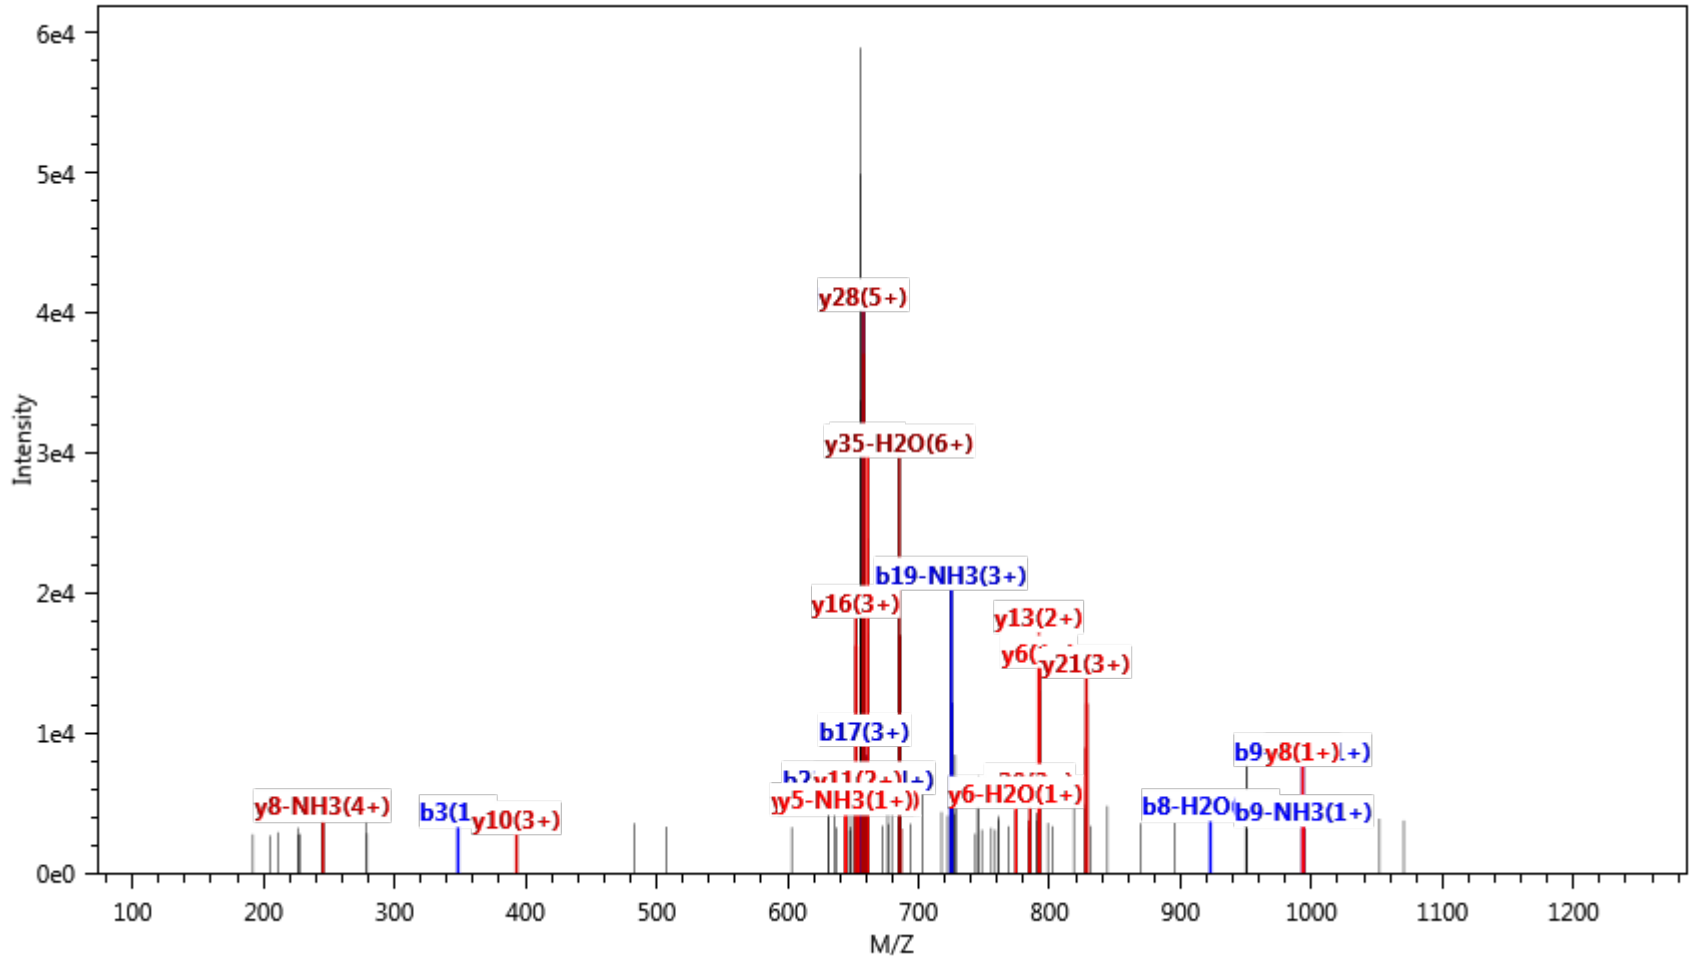

# IREGMGQLVAANDG, charge 2

Ms2 Spectrum (Scan: 8543, Raw: CPTAC\_OT\_Pep\_JB\_5429\_5min\_4May12\_Legolas\_11-07-64)

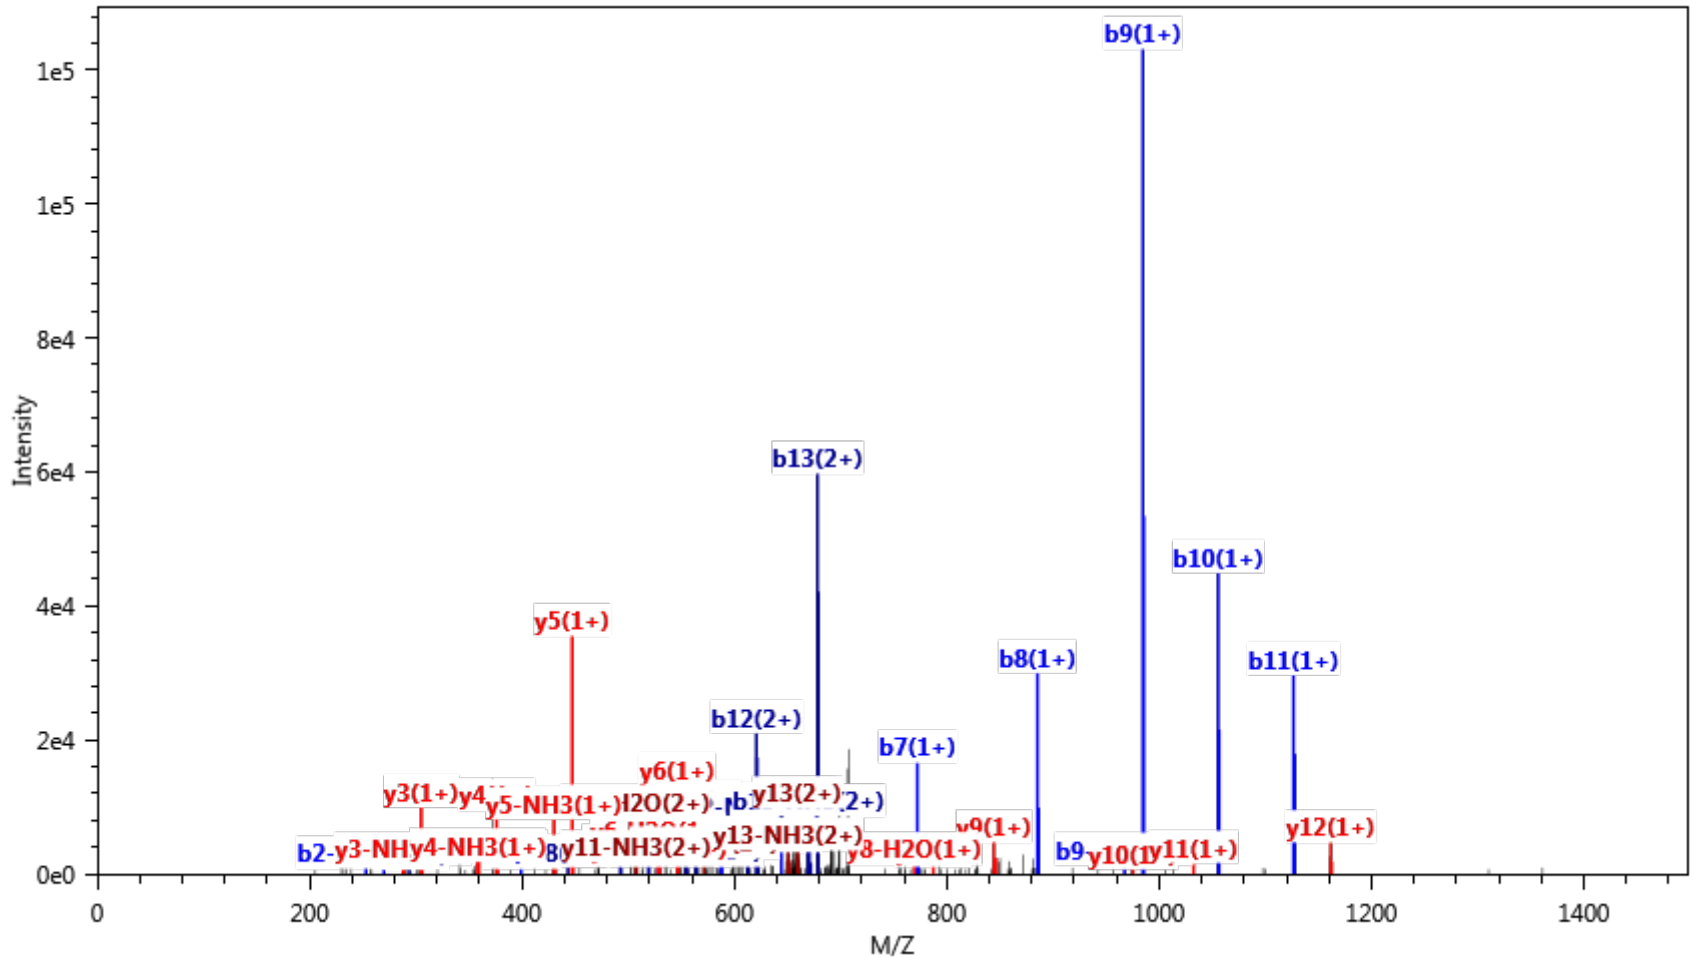

# FDYQGKTEKHESQRDYSK, charge 5

Ms2 Spectrum (Scan: 2375, Raw: CPTAC\_OT\_Pep\_JB\_5429\_5min\_4May12\_Legolas\_11-07-64)

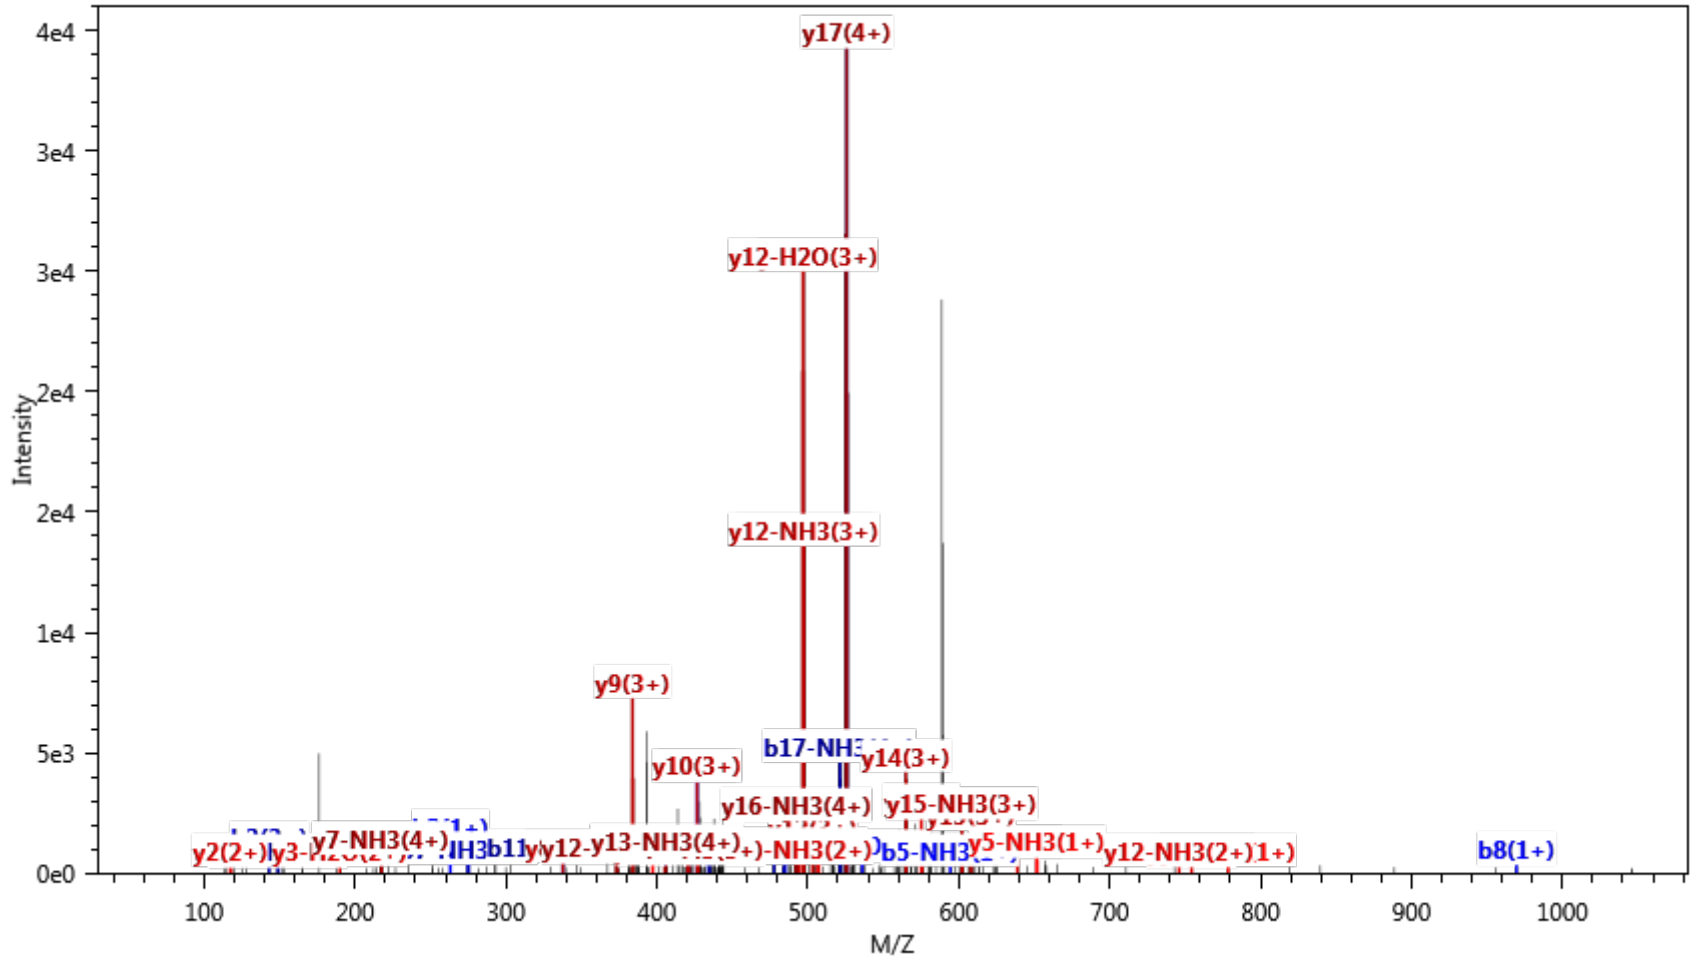

# DAVLGRRQVEELQLQVQAQQQAWQALHREQR, charge 5

Ms2 Spectrum (Scan: 10681, Raw: CPTAC\_OT\_Pep\_JB\_5429\_60min\_4May12\_Legolas\_11-07-64)

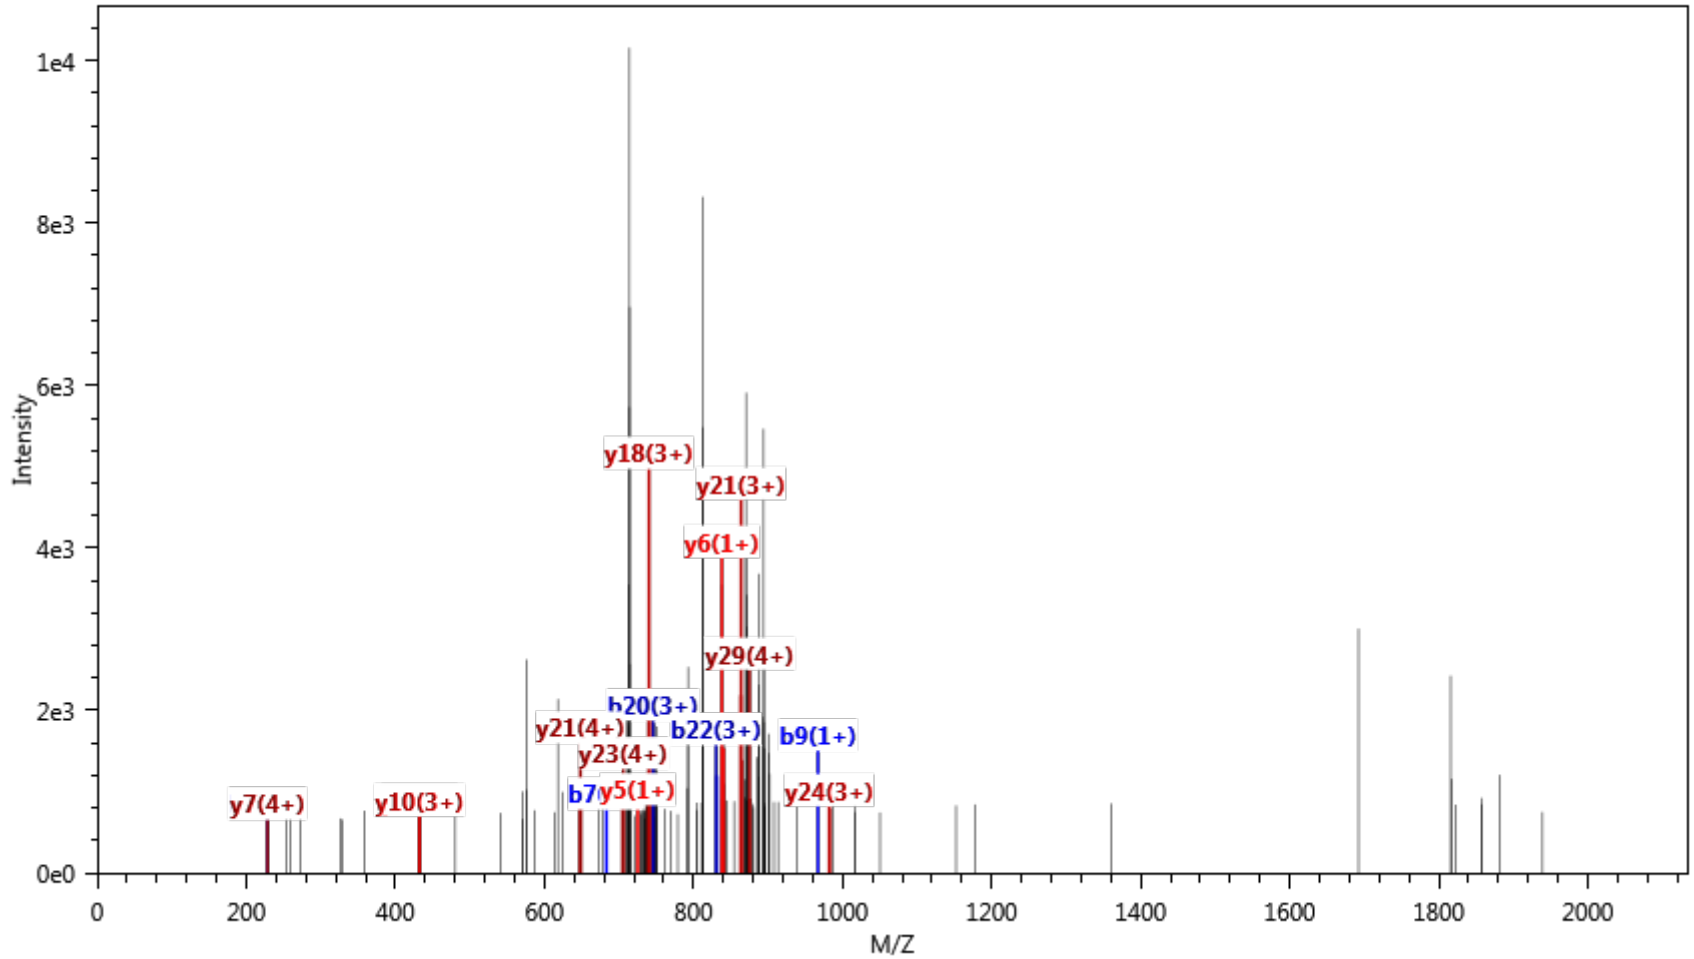

# GMPPFGMPPAPPPPPQ, charge 2

Ms2 Spectrum (Scan: 13822, Raw: CPTAC\_OT\_Pep\_JB\_5429\_60min\_4May12\_Legolas\_11-07-64)

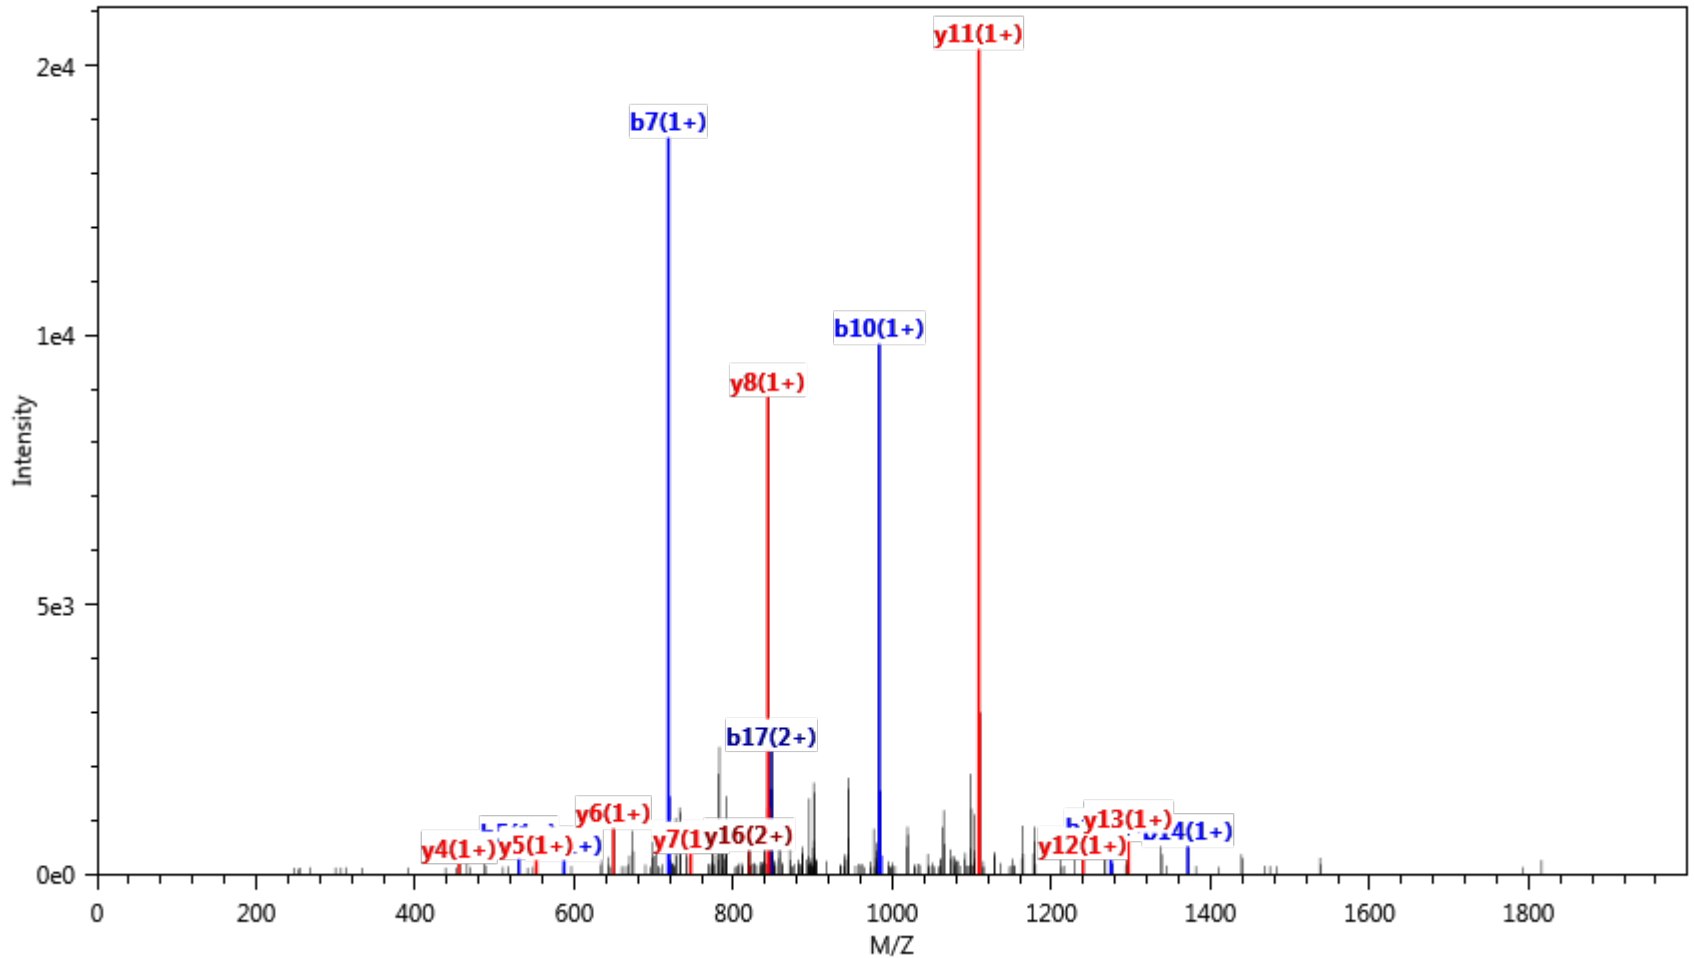

# GGQQTWAPERPLVG, charge 2

Ms2 Spectrum (Scan: 11189, Raw: CPTAC\_OT\_Pep\_JB\_5429\_60min\_4May12\_Legolas\_11-07-64)

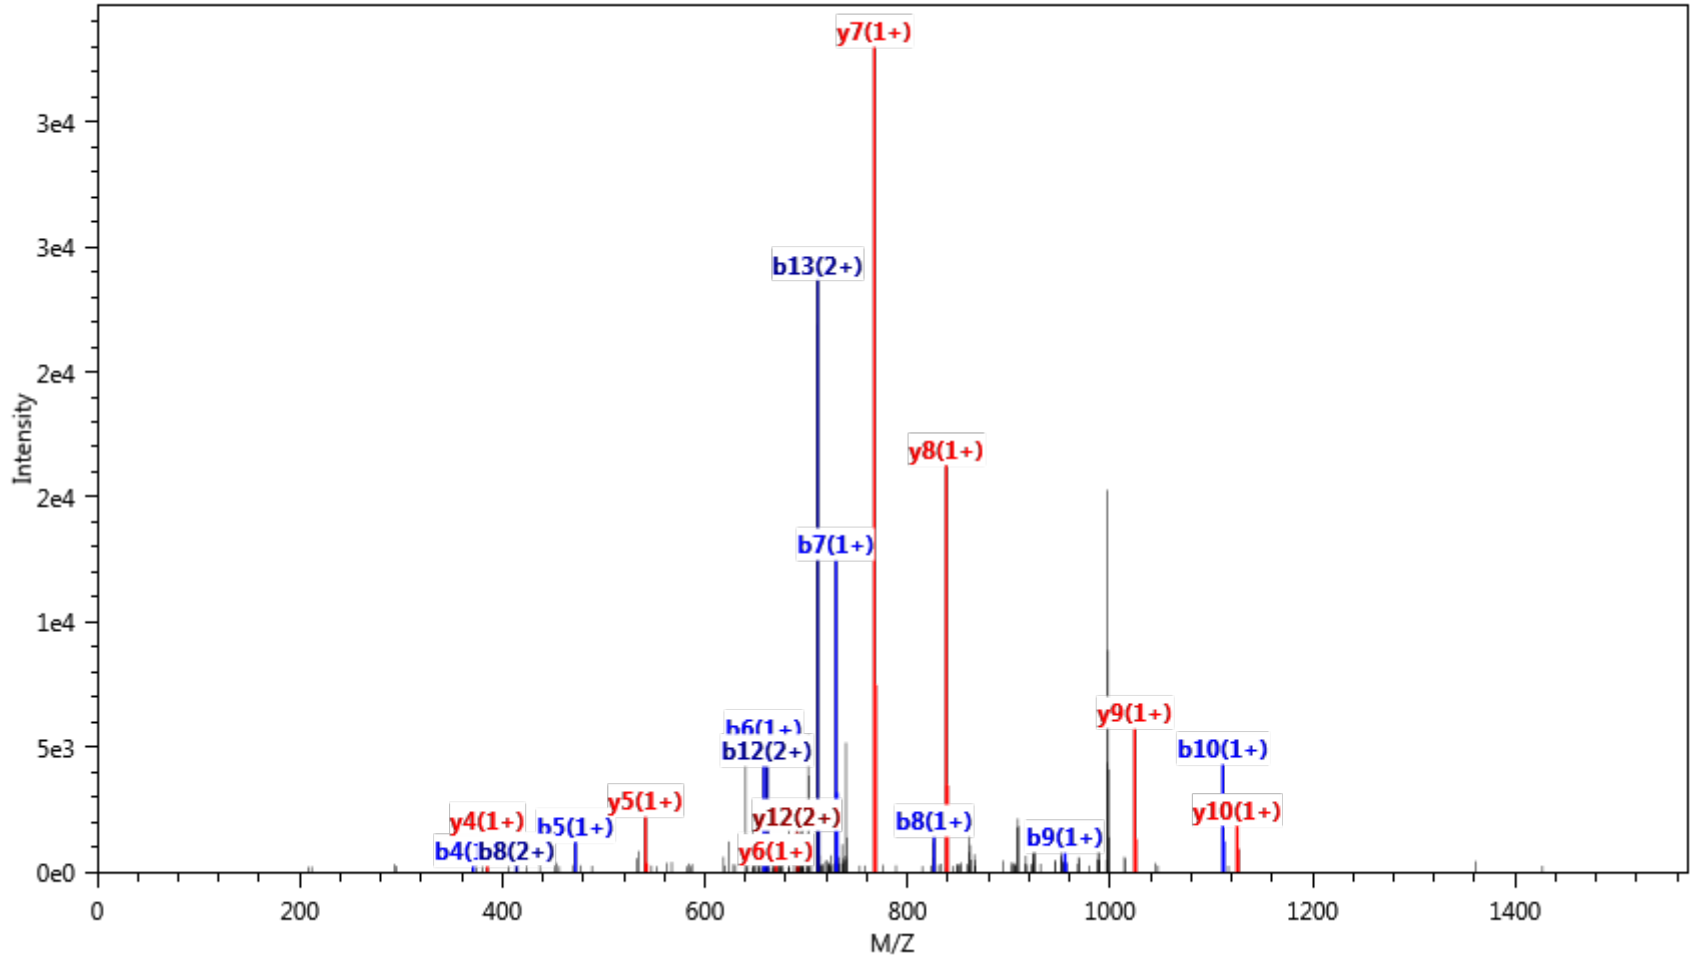



# MGPEGQLGRRVASGSPGEGISPQSAQAPQAPGDNHVVPVLR, charge 5

Ms2 Spectrum (Scan: 10414, Raw: CPTAC\_OT\_Pep\_JB\_5429\_60min\_4May12\_Legolas\_11-07-64)

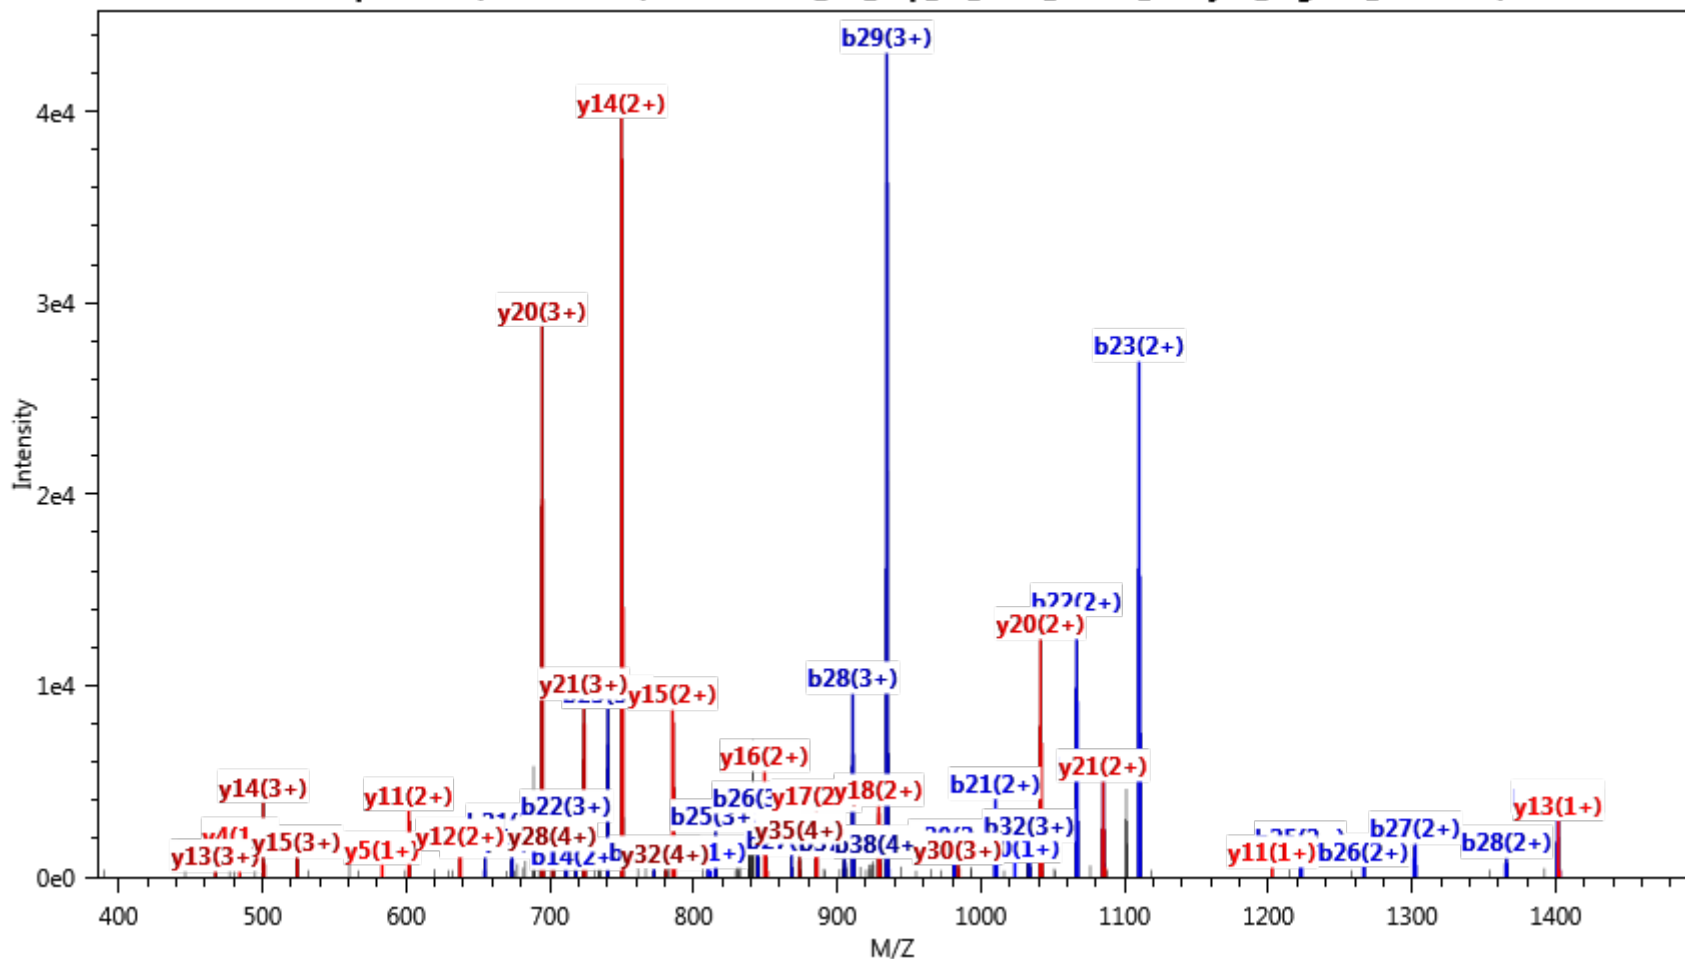

# EEVSGNVSPGTRREYH, charge 4

Ms2 Spectrum (Scan: 2740, Raw: CPTAC\_OT\_Pep\_JB\_5429\_60min\_4May12\_Legolas\_11-07-64)

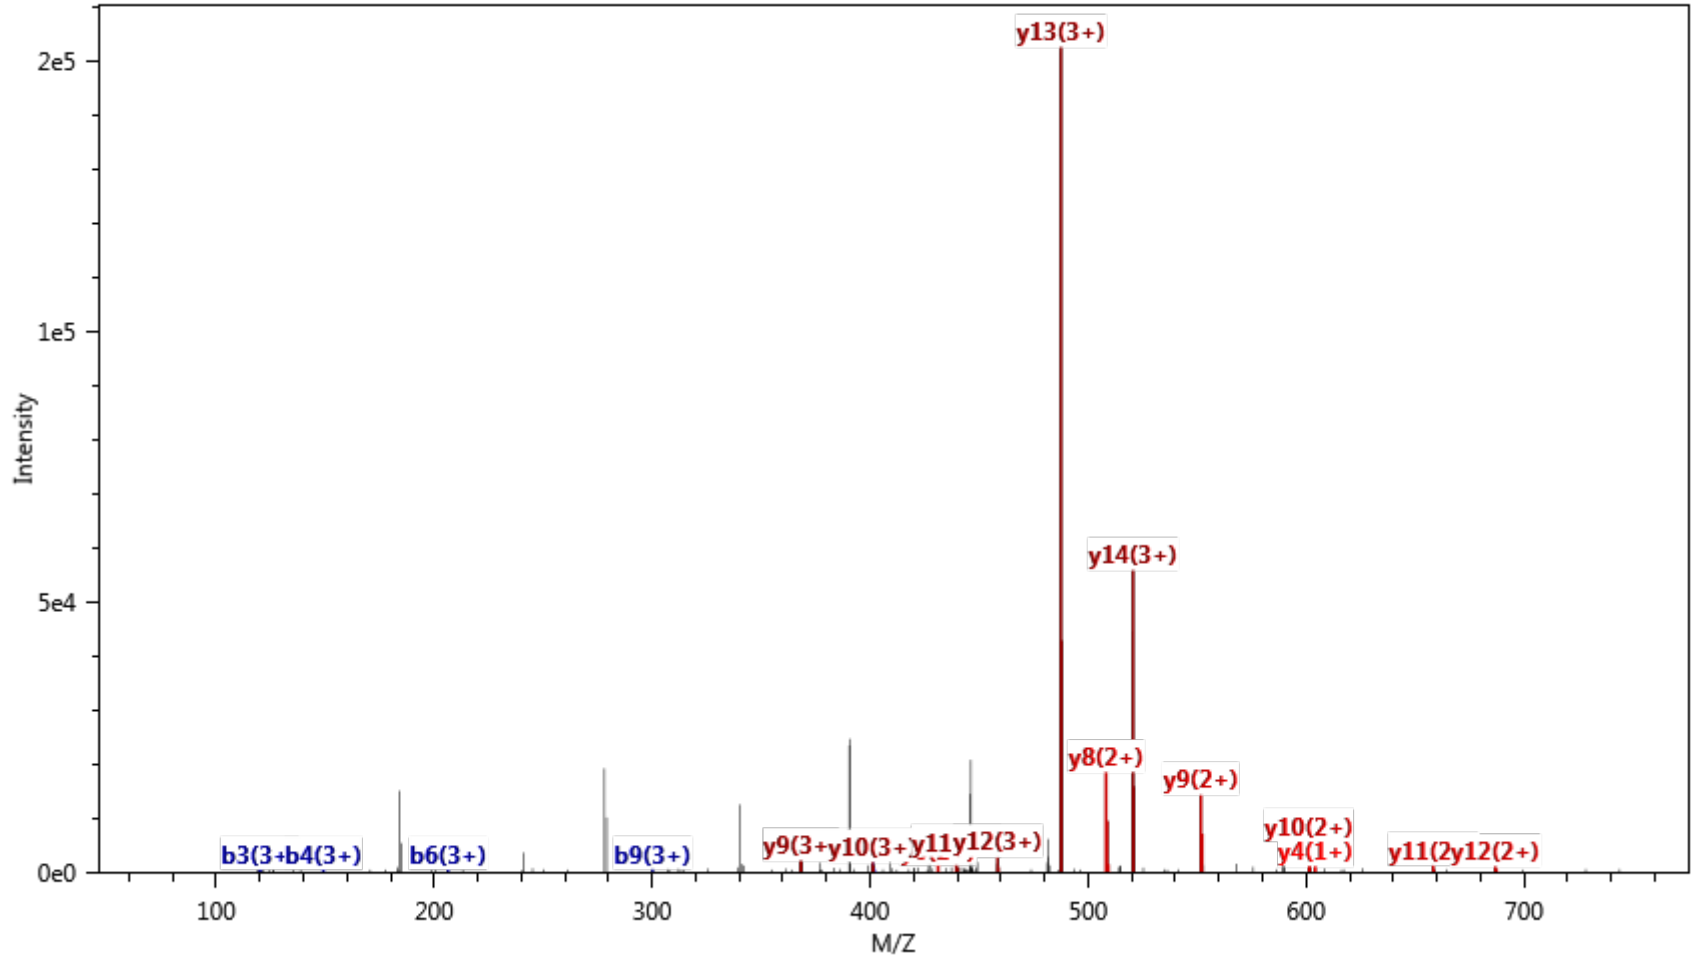

# VGPFALPAGGQ, charge 1

Ms2 Spectrum (Scan: 12894, Raw: CPTAC\_OT\_Pep\_JB\_5429\_60min\_4May12\_Legolas\_11-07-64)

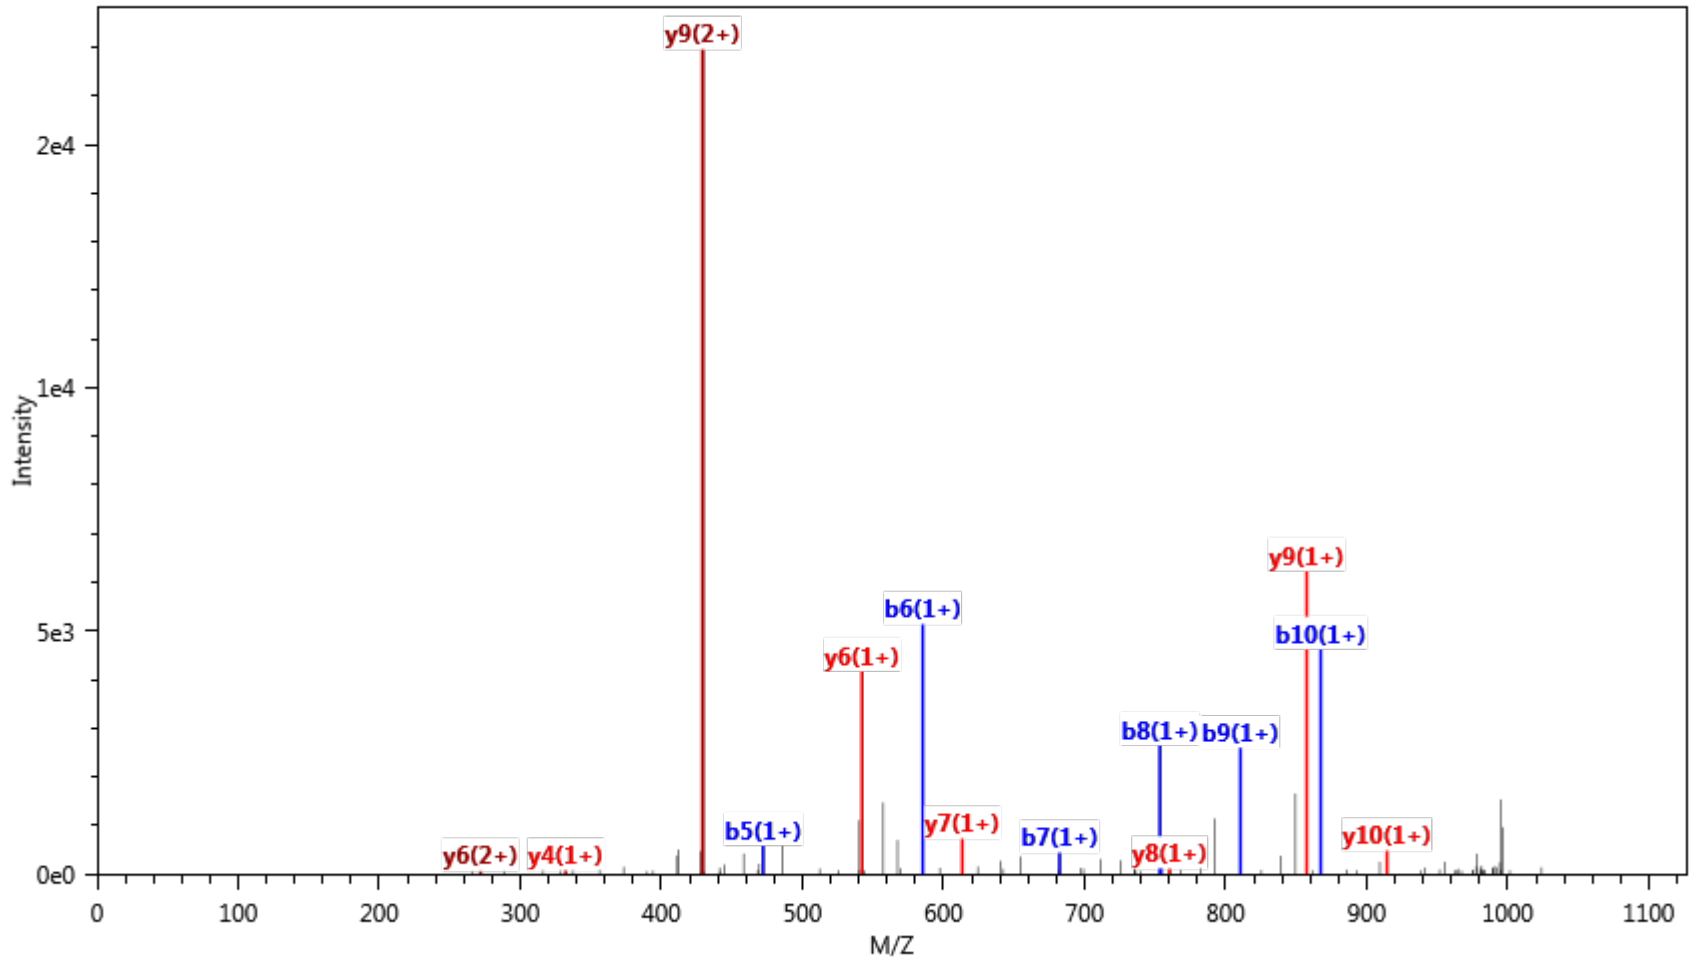

# YEILNSPEKACSLAKTAFDEA, charge 3

Ms2 Spectrum (Scan: 17982, Raw: CPTAC\_OT\_Pep\_JB\_5439\_0min\_4May12\_Legolas\_11-07-64)

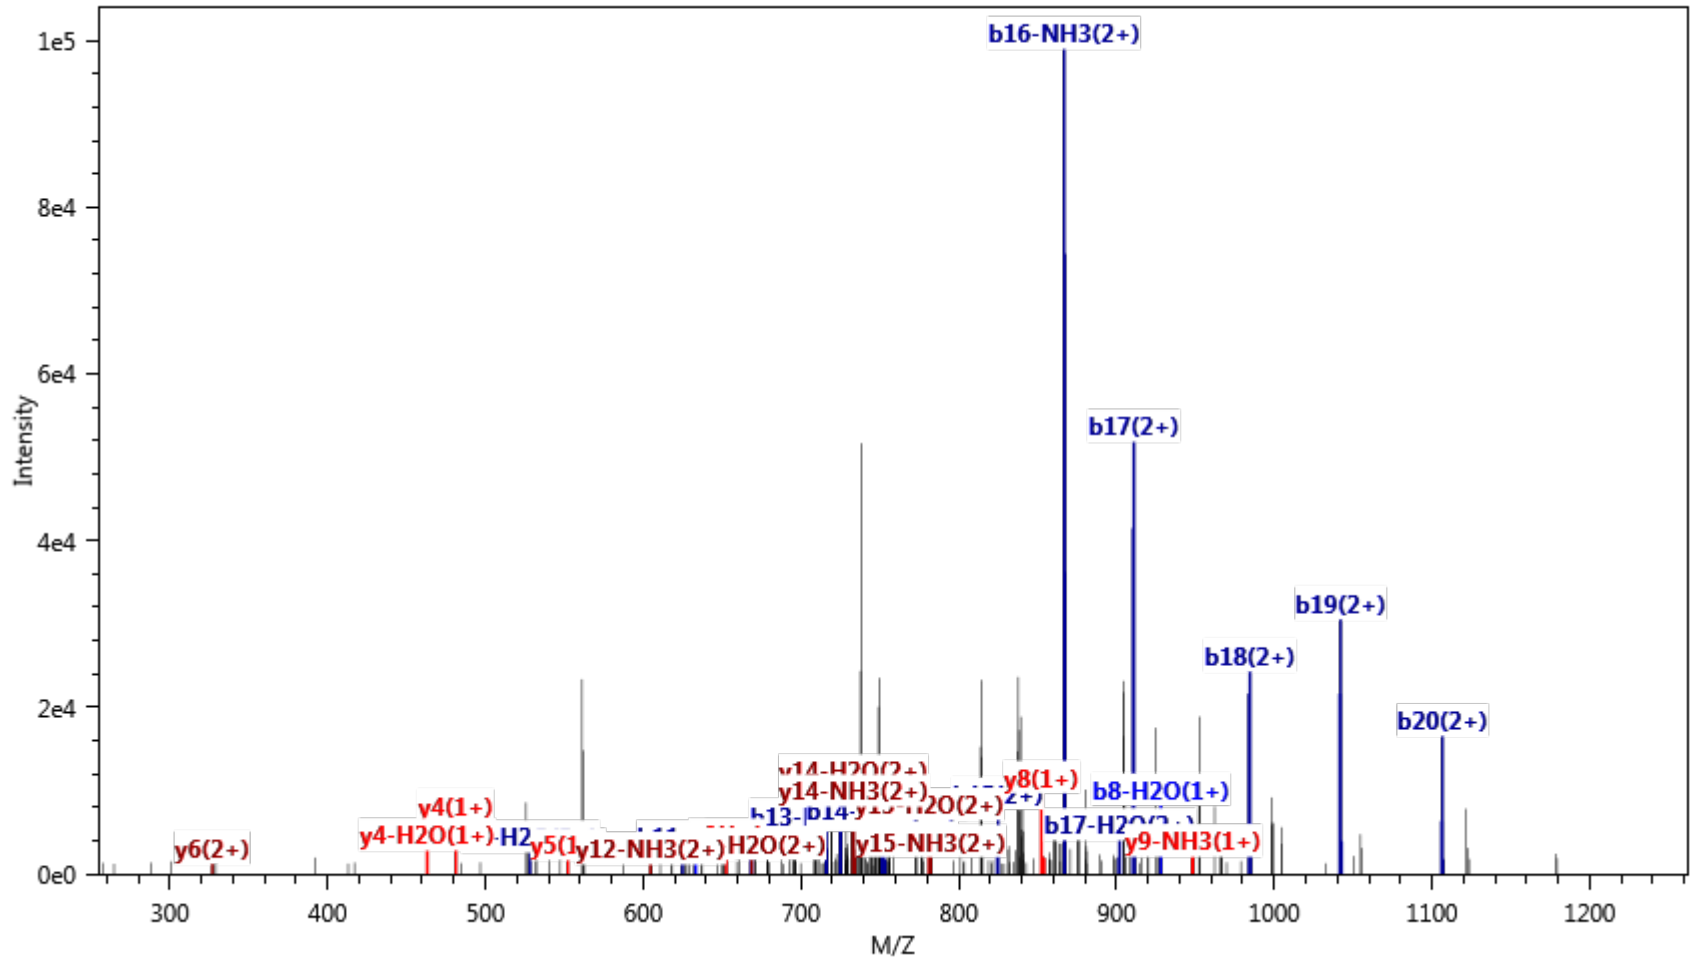

# IQQNPSSLPALLQQIGRENPQLLQQISQHQEHF, charge 4

Ms2 Spectrum (Scan: 22519, Raw: CPTAC\_OT\_Pep\_JB\_5439\_0min\_4May12\_Legolas\_11-07-64)

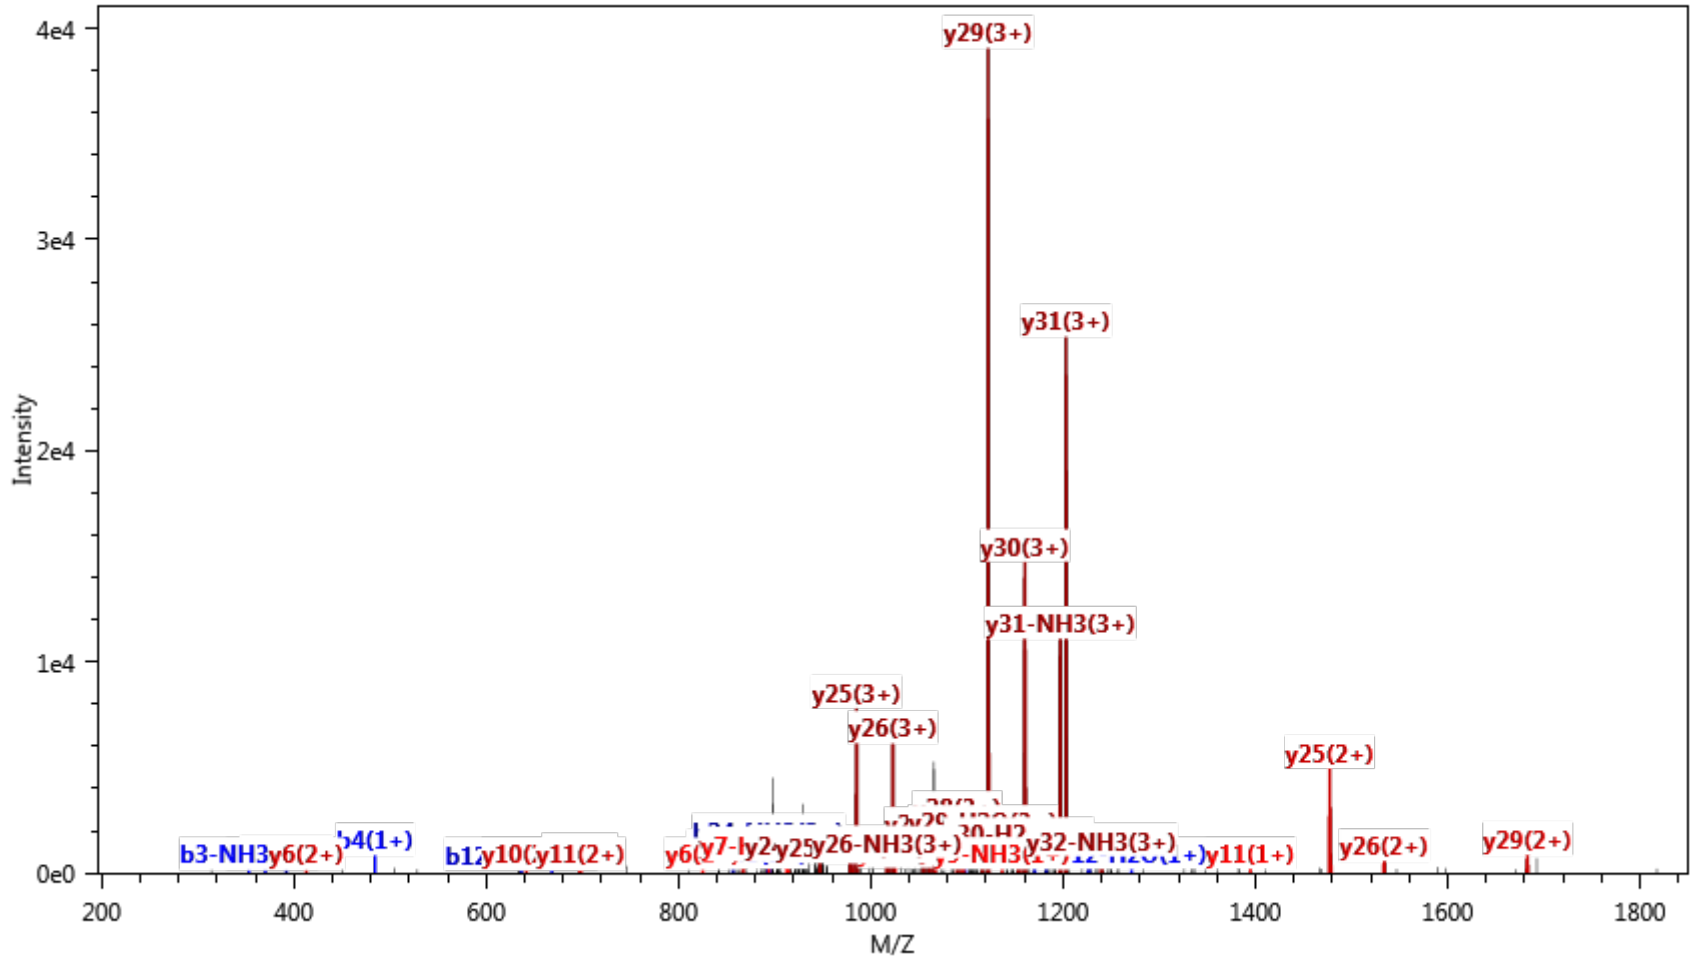

# LESEREARRLR, charge 3

Ms2 Spectrum (Scan: 1479, Raw: CPTAC\_OT\_Pep\_JB\_5439\_0min\_4May12\_Legolas\_11-07-64)

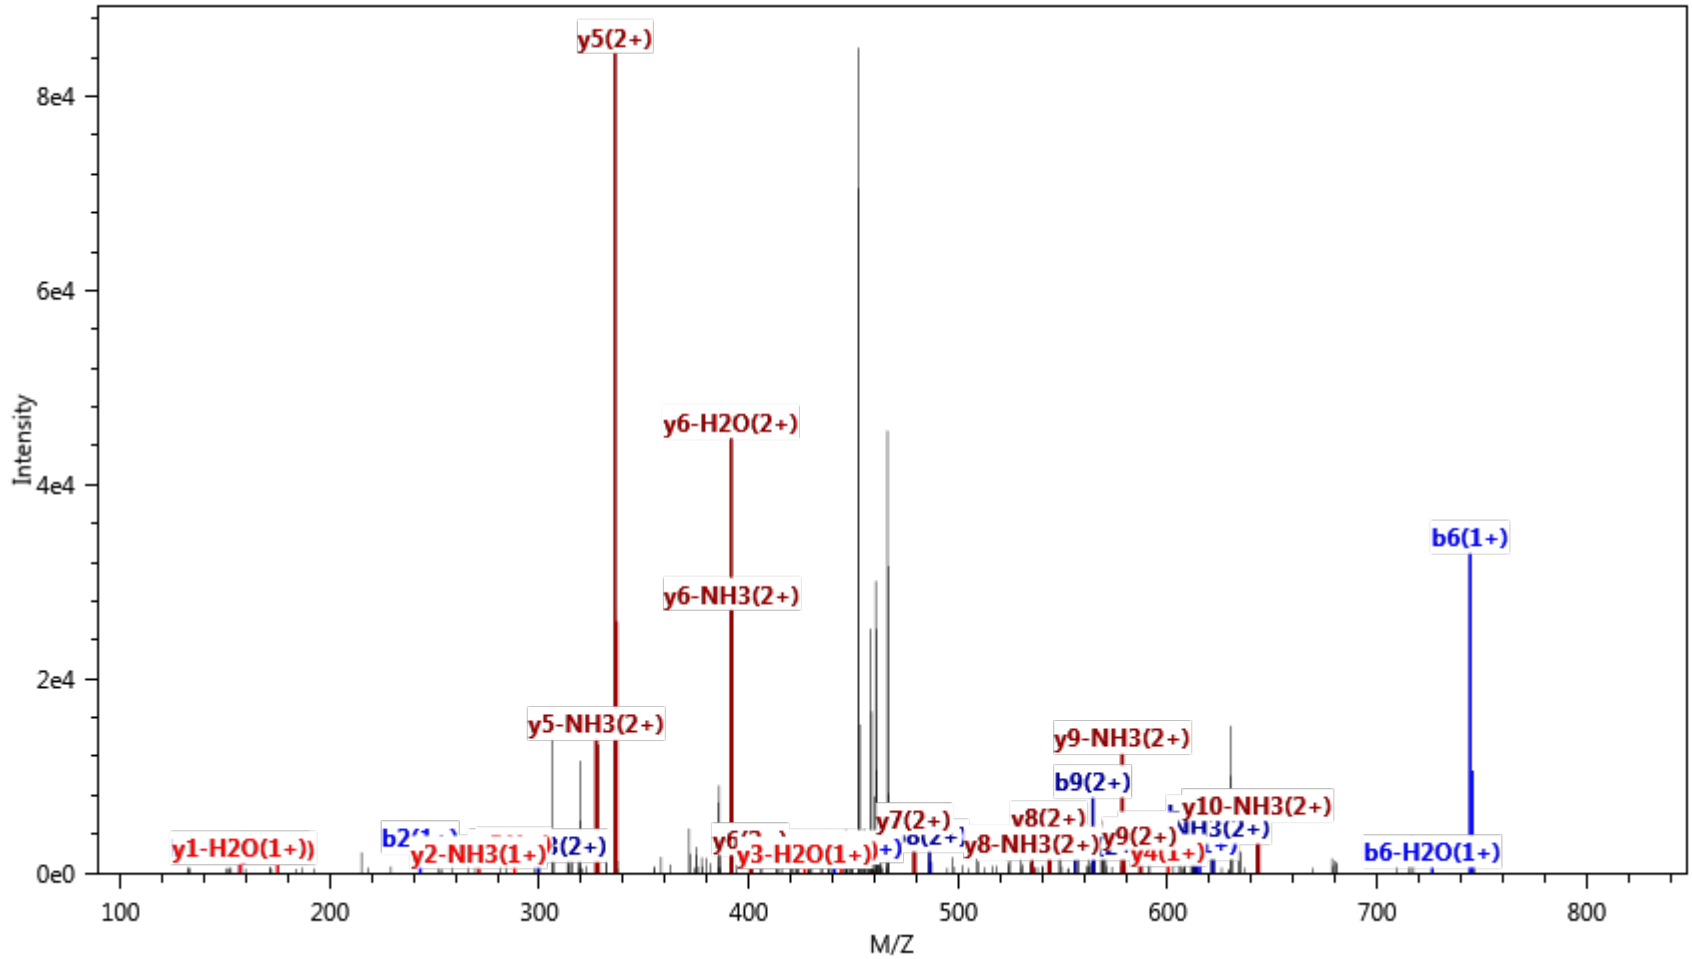

# IRYVENNKNADN, charge 3

Ms2 Spectrum (Scan: 1965, Raw: CPTAC\_OT\_Pep\_JB\_5439\_0min\_4May12\_Legolas\_11-07-64)

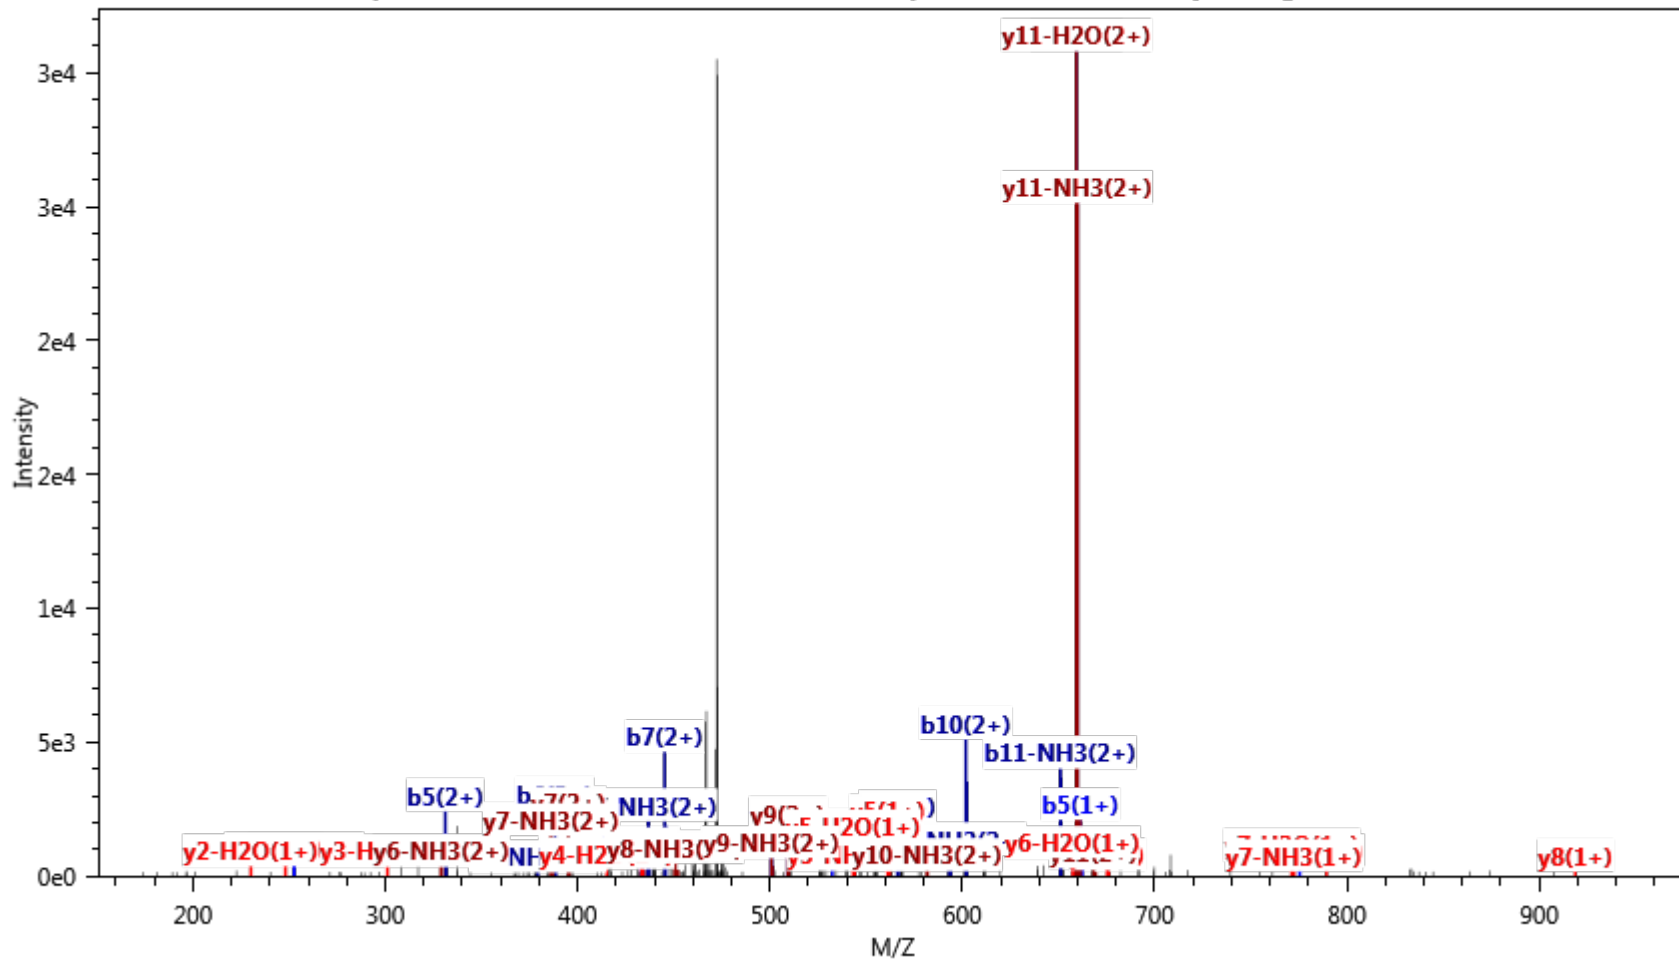

# FEKSKEQLTPLIKKAGTEL, charge 4

Ms2 Spectrum (Scan: 11020, Raw: CPTAC\_OT\_Pep\_JB\_5439\_0min\_4May12\_Legolas\_11-07-64)

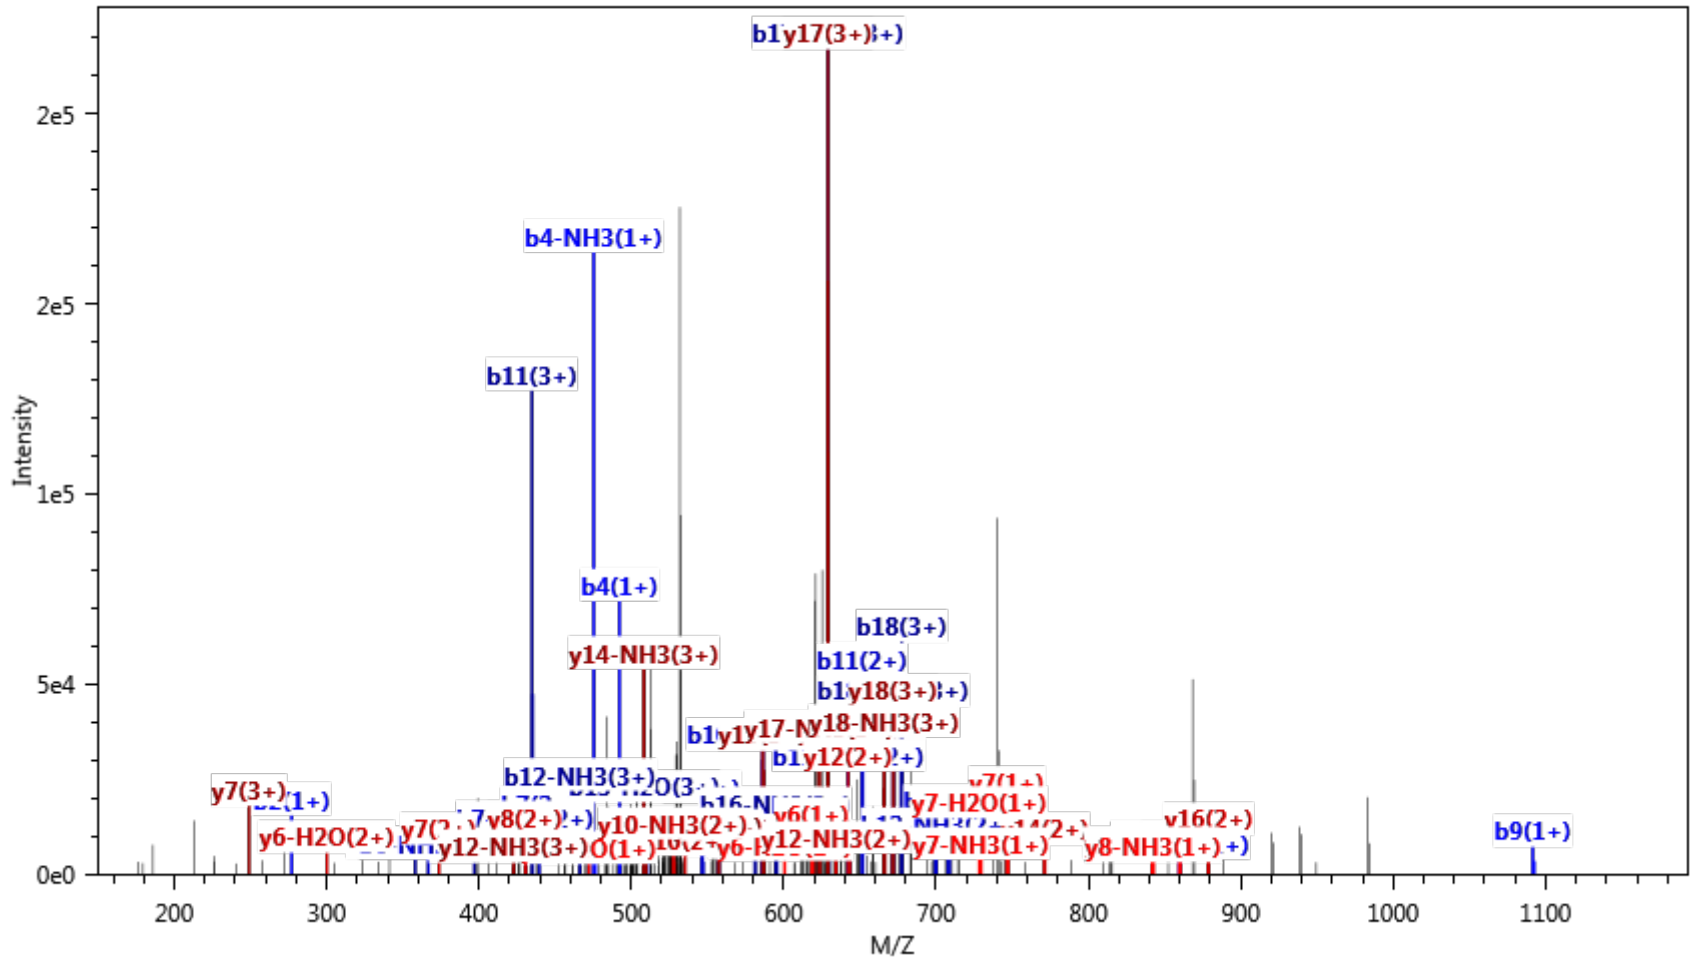



# FPNKNLKKNYCRNPDREL, charge 3

Ms2 Spectrum (Scan: 12772, Raw: CPTAC\_OT\_Pep\_JB\_5439\_0min\_4May12\_Legolas\_11-07-64)

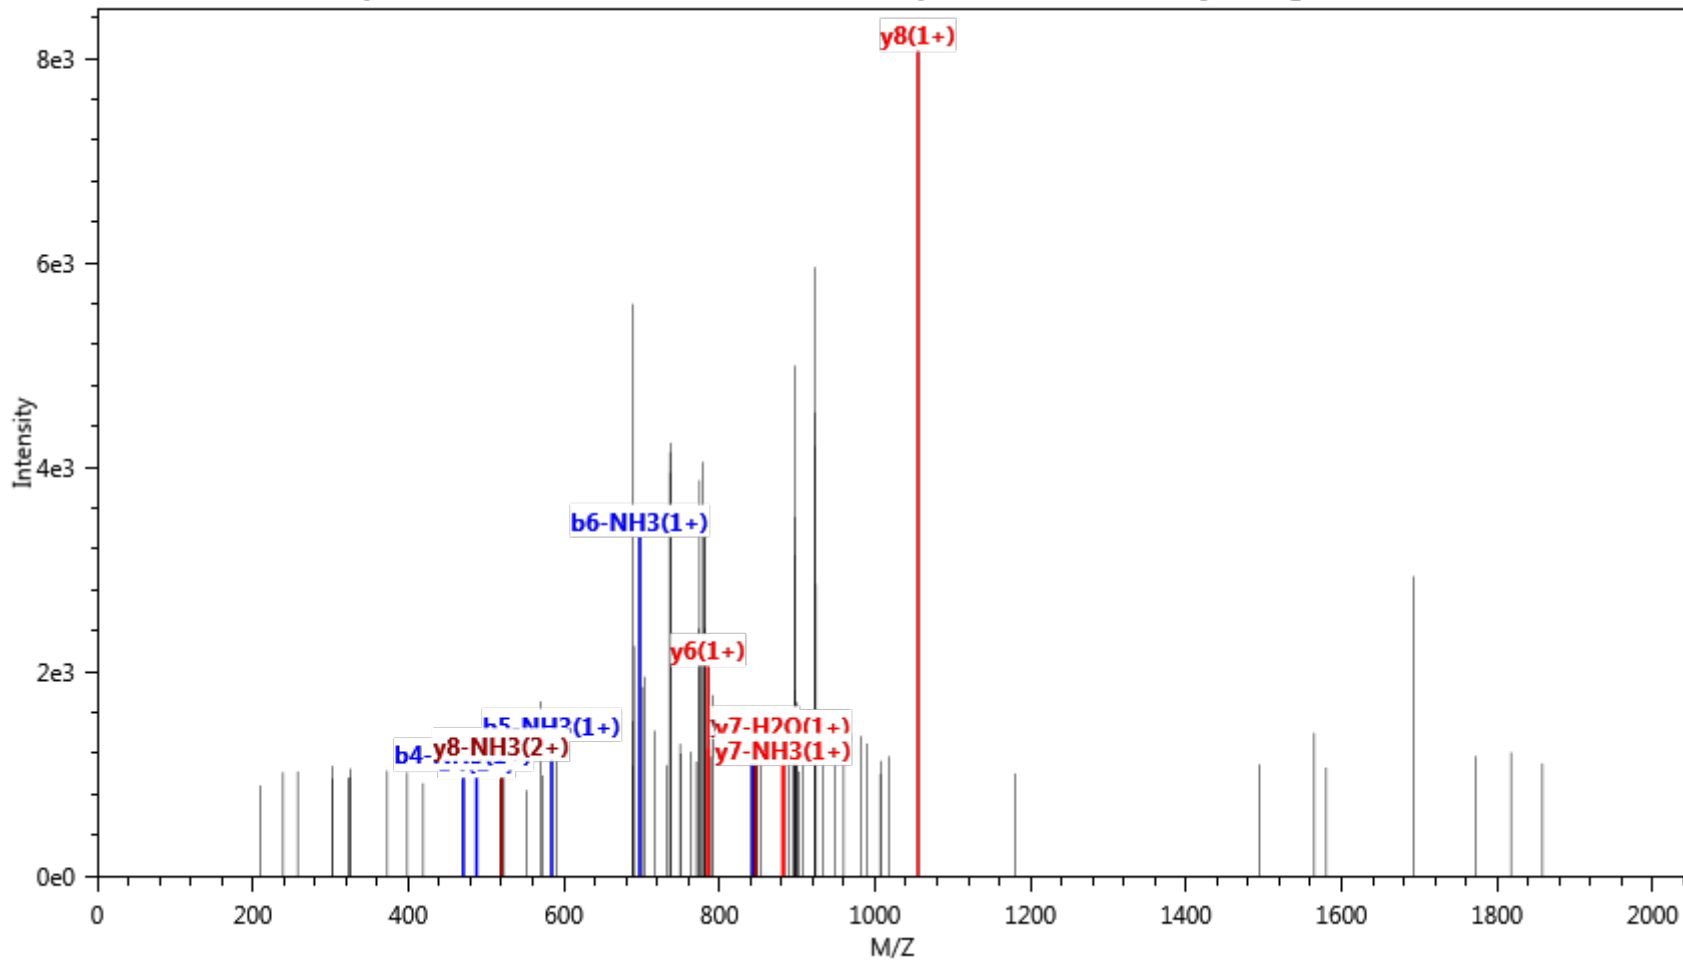

# INILHSEDLGK, charge 3

Ms2 Spectrum (Scan: 9903, Raw: CPTAC\_OT\_Pep\_JB\_5439\_0min\_4May12\_Legolas\_11-07-64)

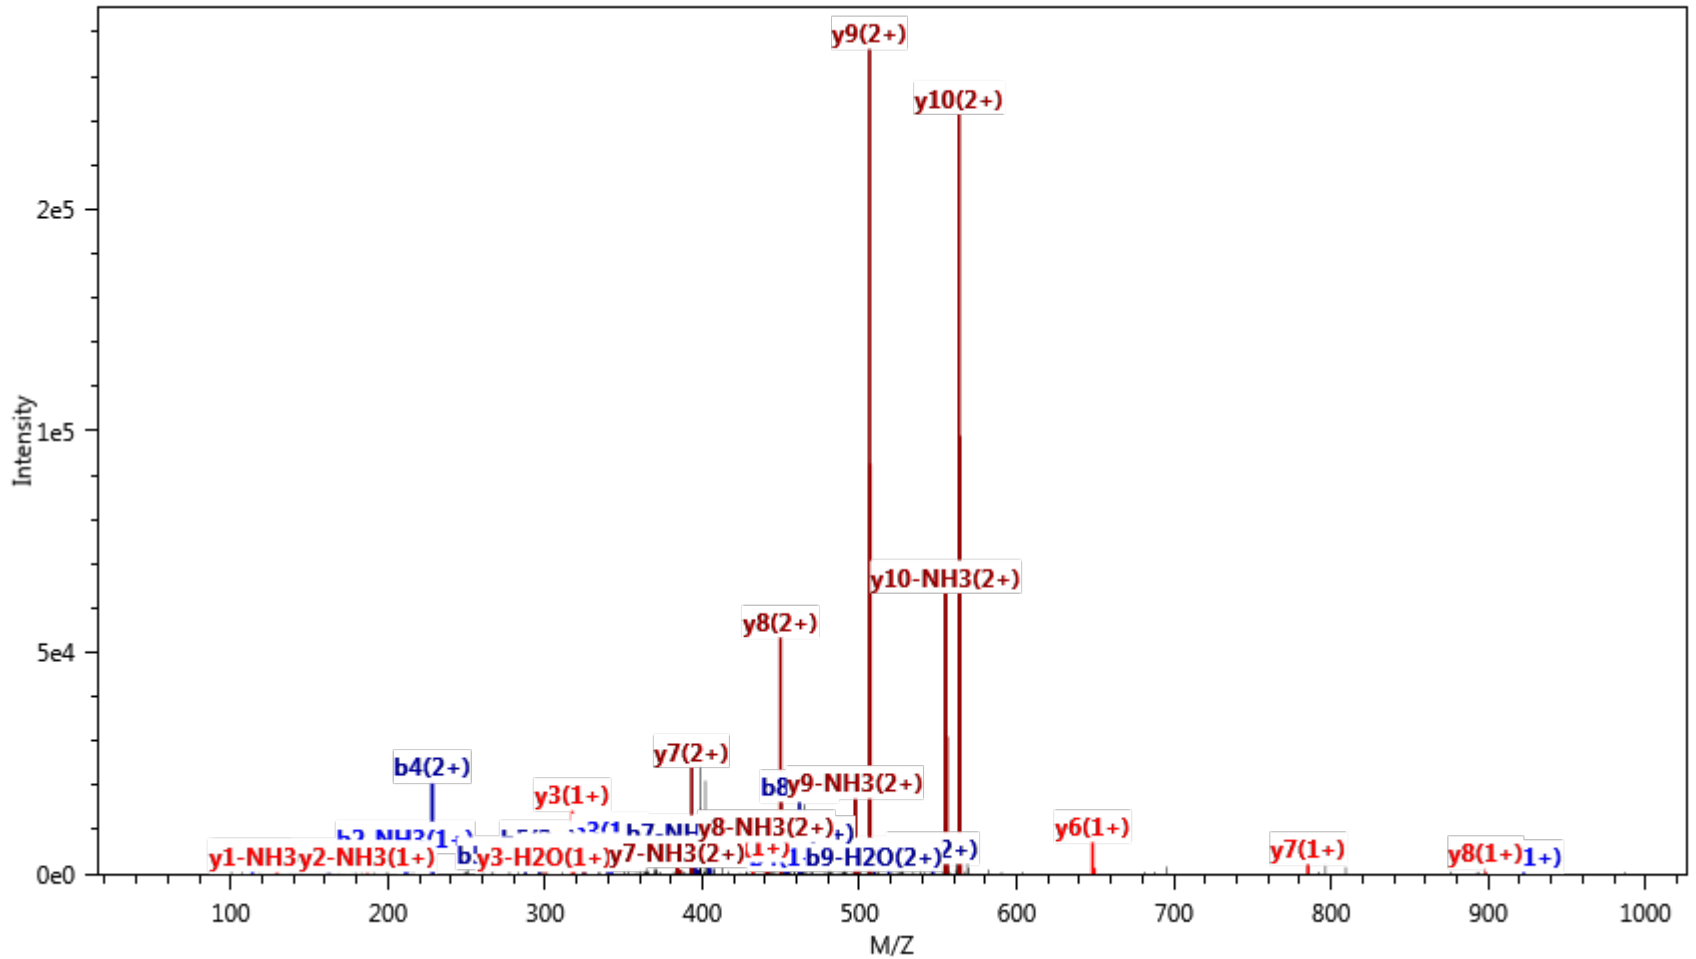

# YAARDVTATVDSLPLITASILSKKL, charge 4

Ms2 Spectrum (Scan: 23027, Raw: CPTAC\_OT\_Pep\_JB\_5439\_0min\_4May12\_Legolas\_11-07-64)

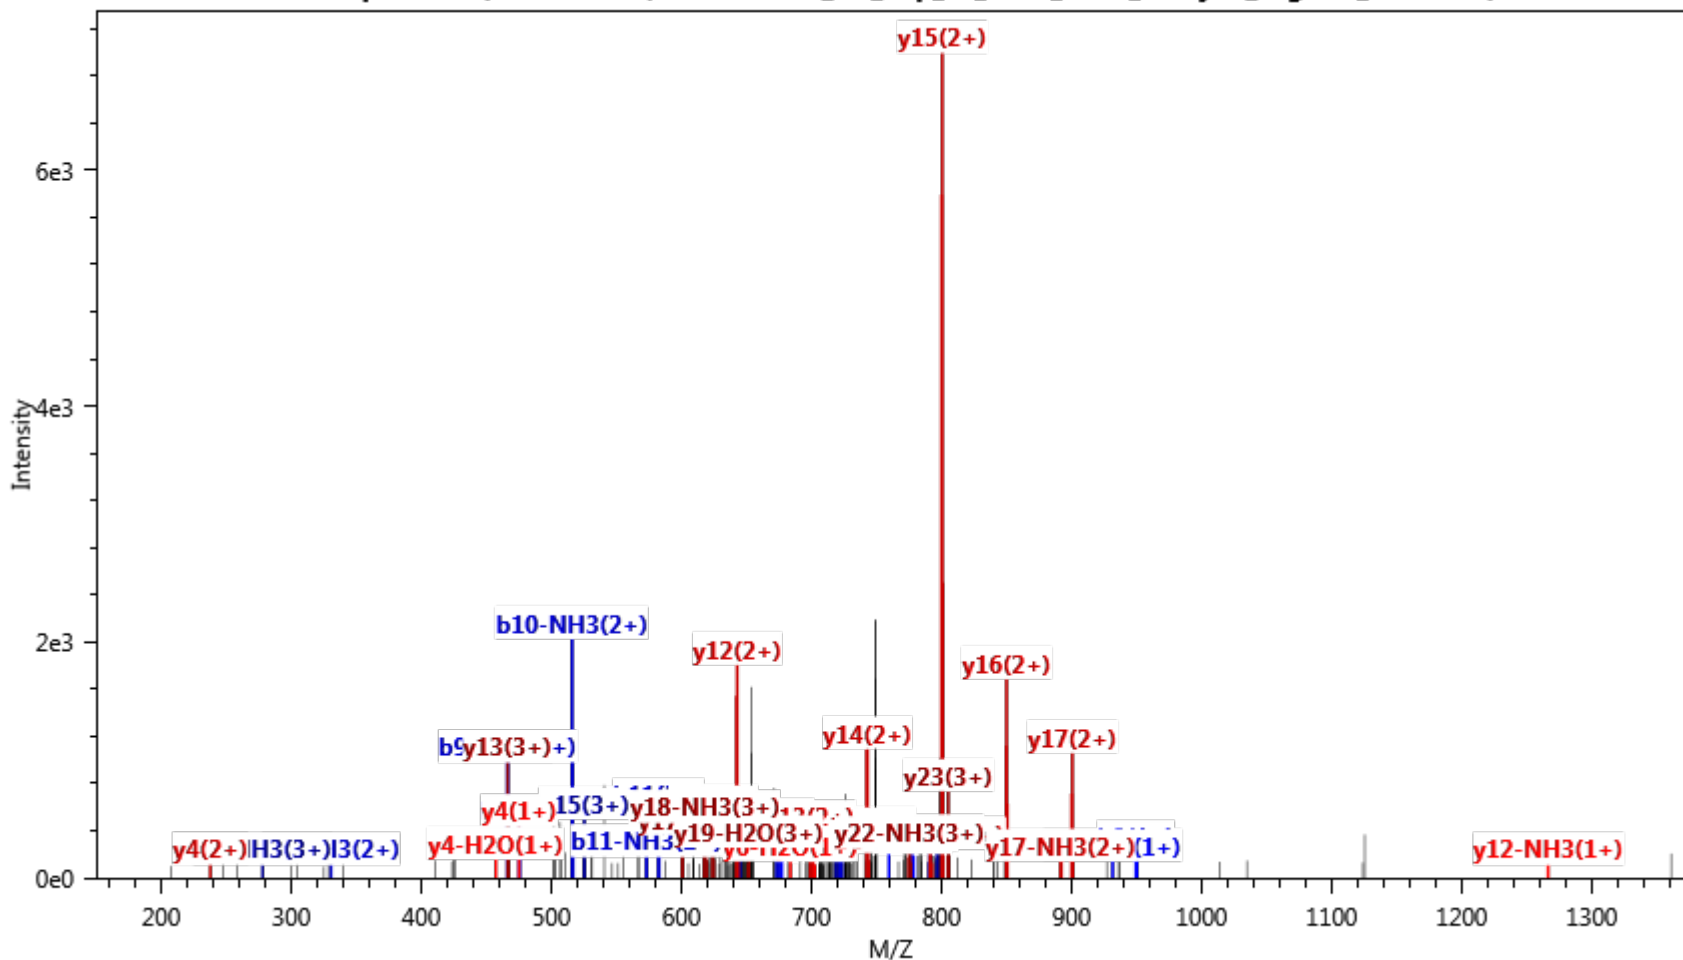

# FEIPDIDAEKL, charge 2

Ms2 Spectrum (Scan: 17990, Raw: CPTAC\_OT\_Pep\_JB\_5439\_0min\_4May12\_Legolas\_11-07-64)

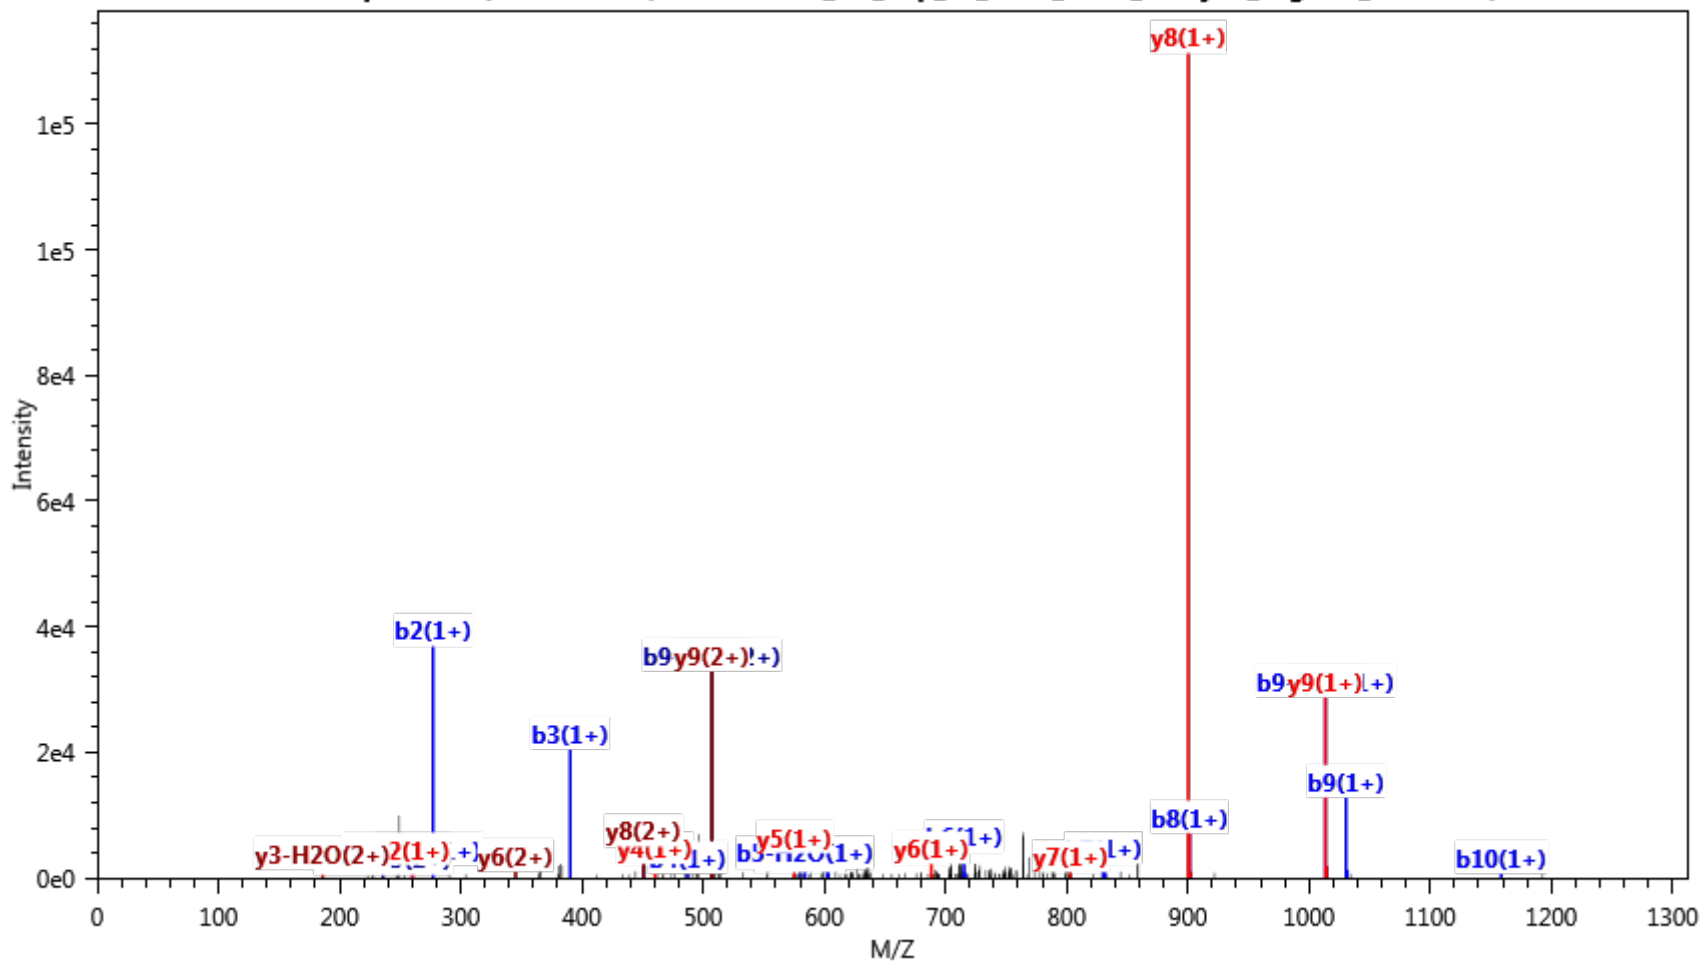

# VGDAVHPQFKEIQKLIKEPAPDSGLLG, charge 4

Ms2 Spectrum (Scan: 16048, Raw: CPTAC\_OT\_Pep\_JB\_5439\_0min\_4May12\_Legolas\_11-07-64)

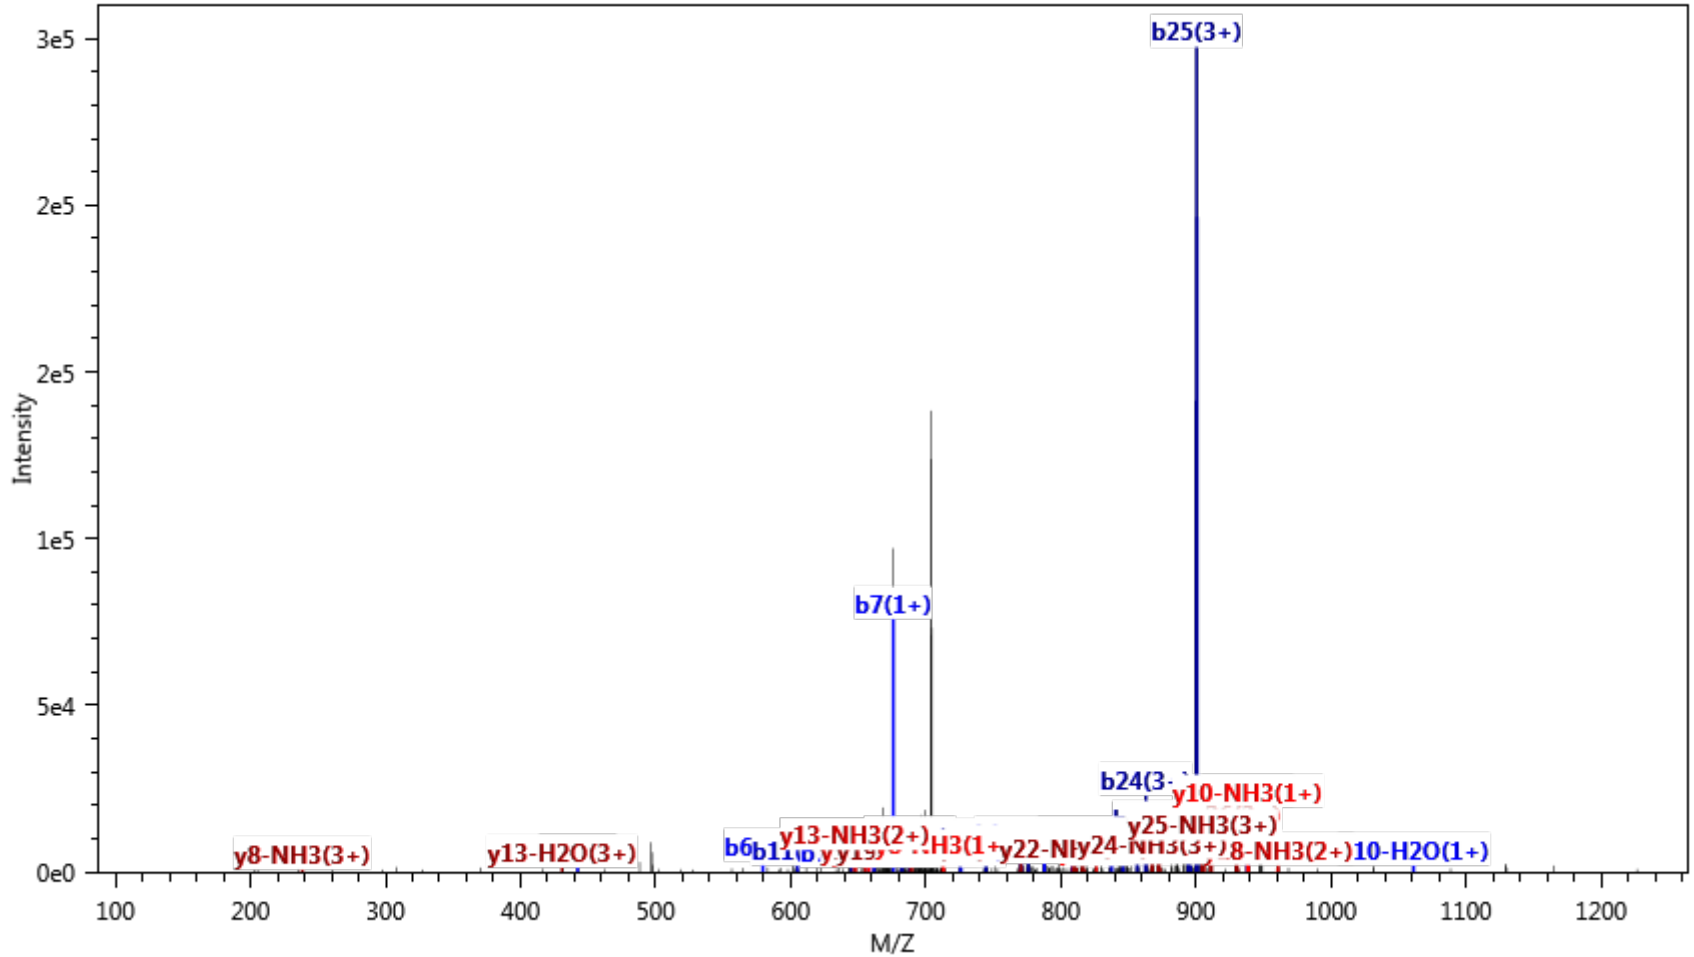

THQETLNRFQQQSIHLLTELLRLKMKAM\*VESMSV  
GANPLDITR, charge 6

Ms2 Spectrum (Scan: 22039, Raw: CPTAC\_OT\_Pep\_JB\_5439\_0min\_4May12\_Legolas\_11-07-64)

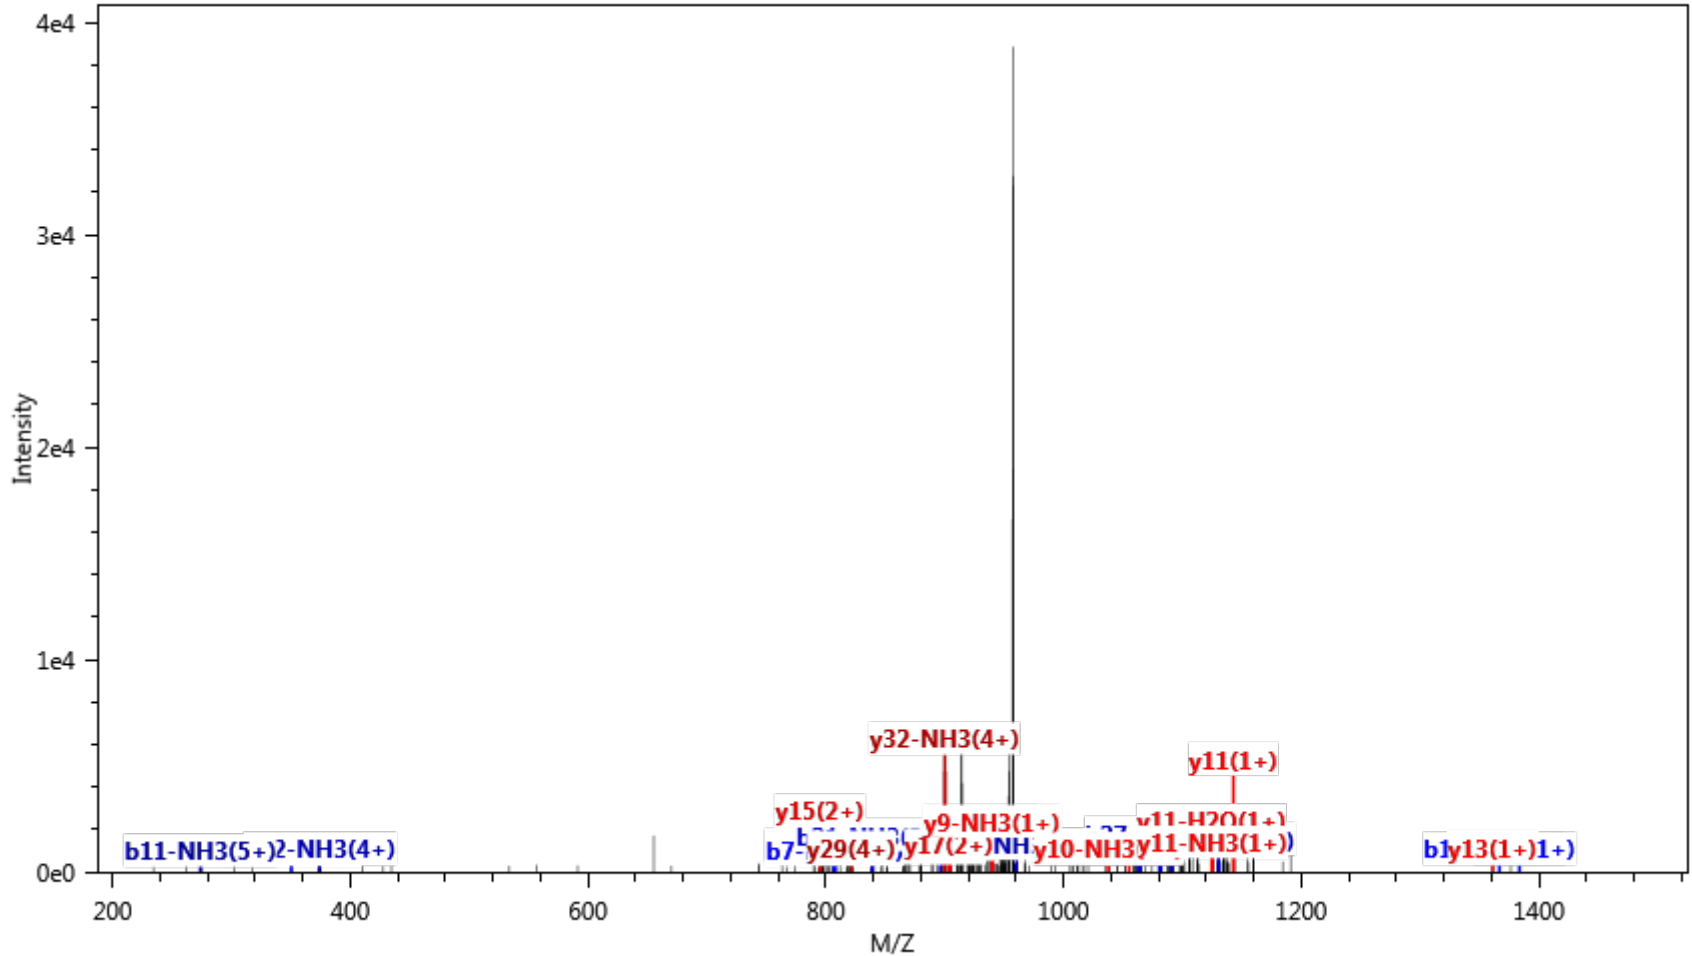

# HLGRPDGVMPDKYSLEPVAVELKS, charge 4

Ms2 Spectrum (Scan: 14663, Raw: CPTAC\_OT\_Pep\_JB\_5439\_30min\_4May12\_Legolas\_11-07-64)

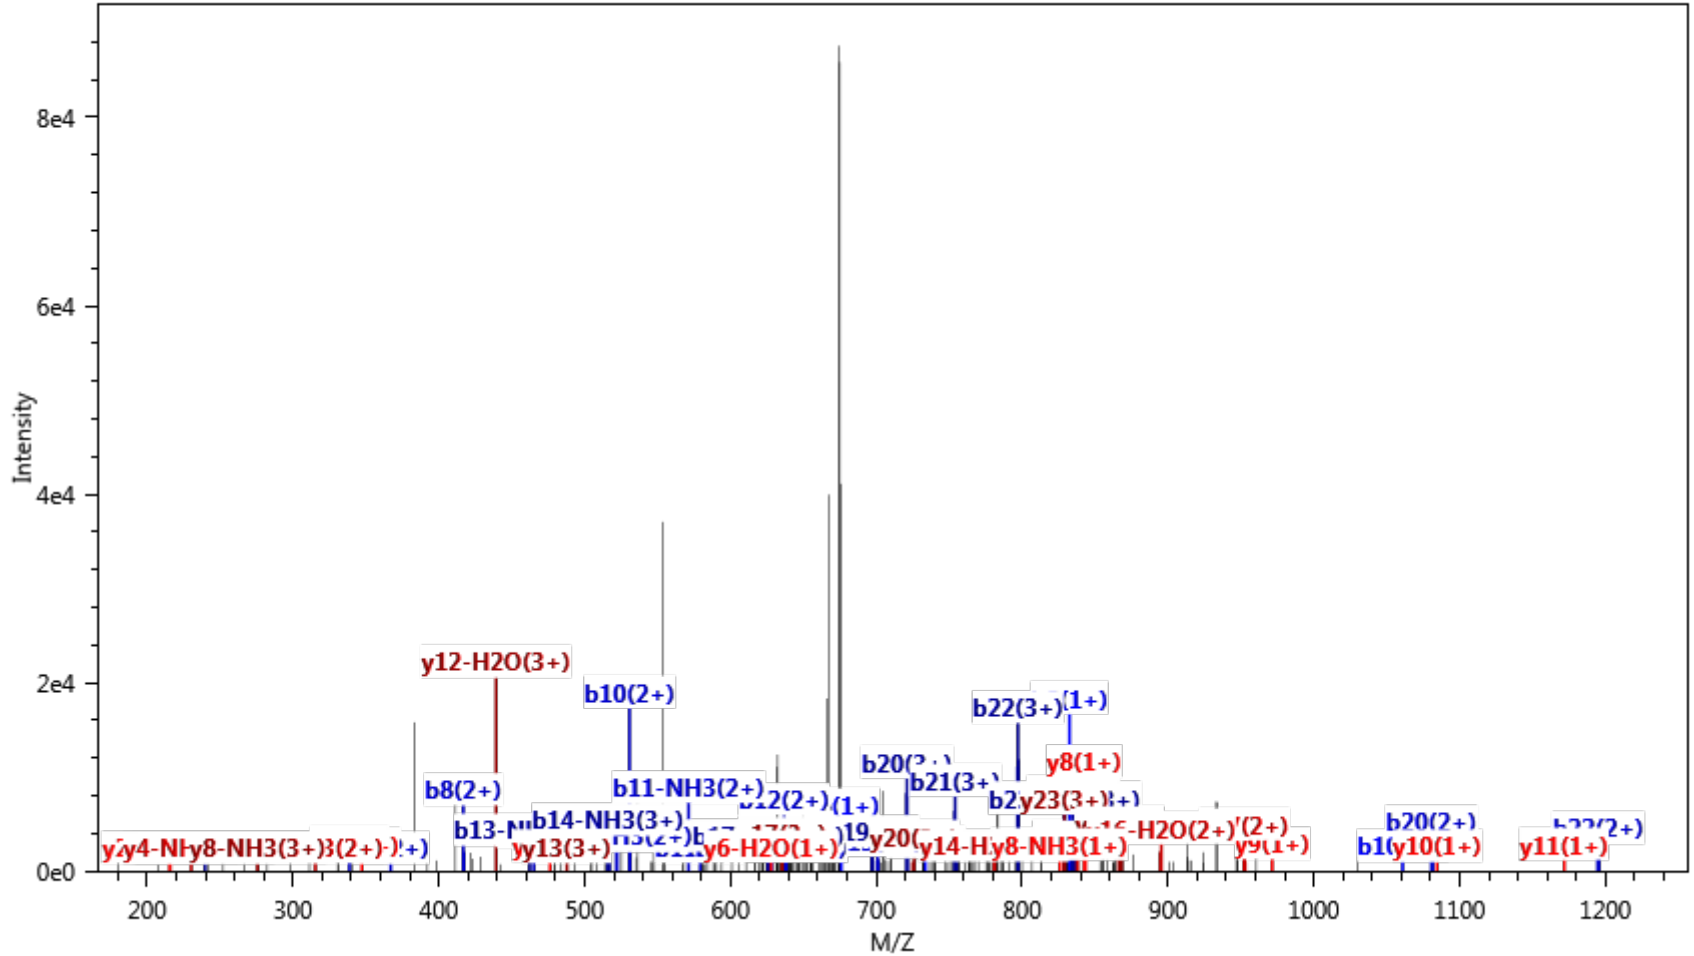

# VGIGDKIRGILYRTHSDQF, charge 3

Ms2 Spectrum (Scan: 17223, Raw: CPTAC\_OT\_Pep\_JB\_5439\_30min\_4May12\_Legolas\_11-07-64)

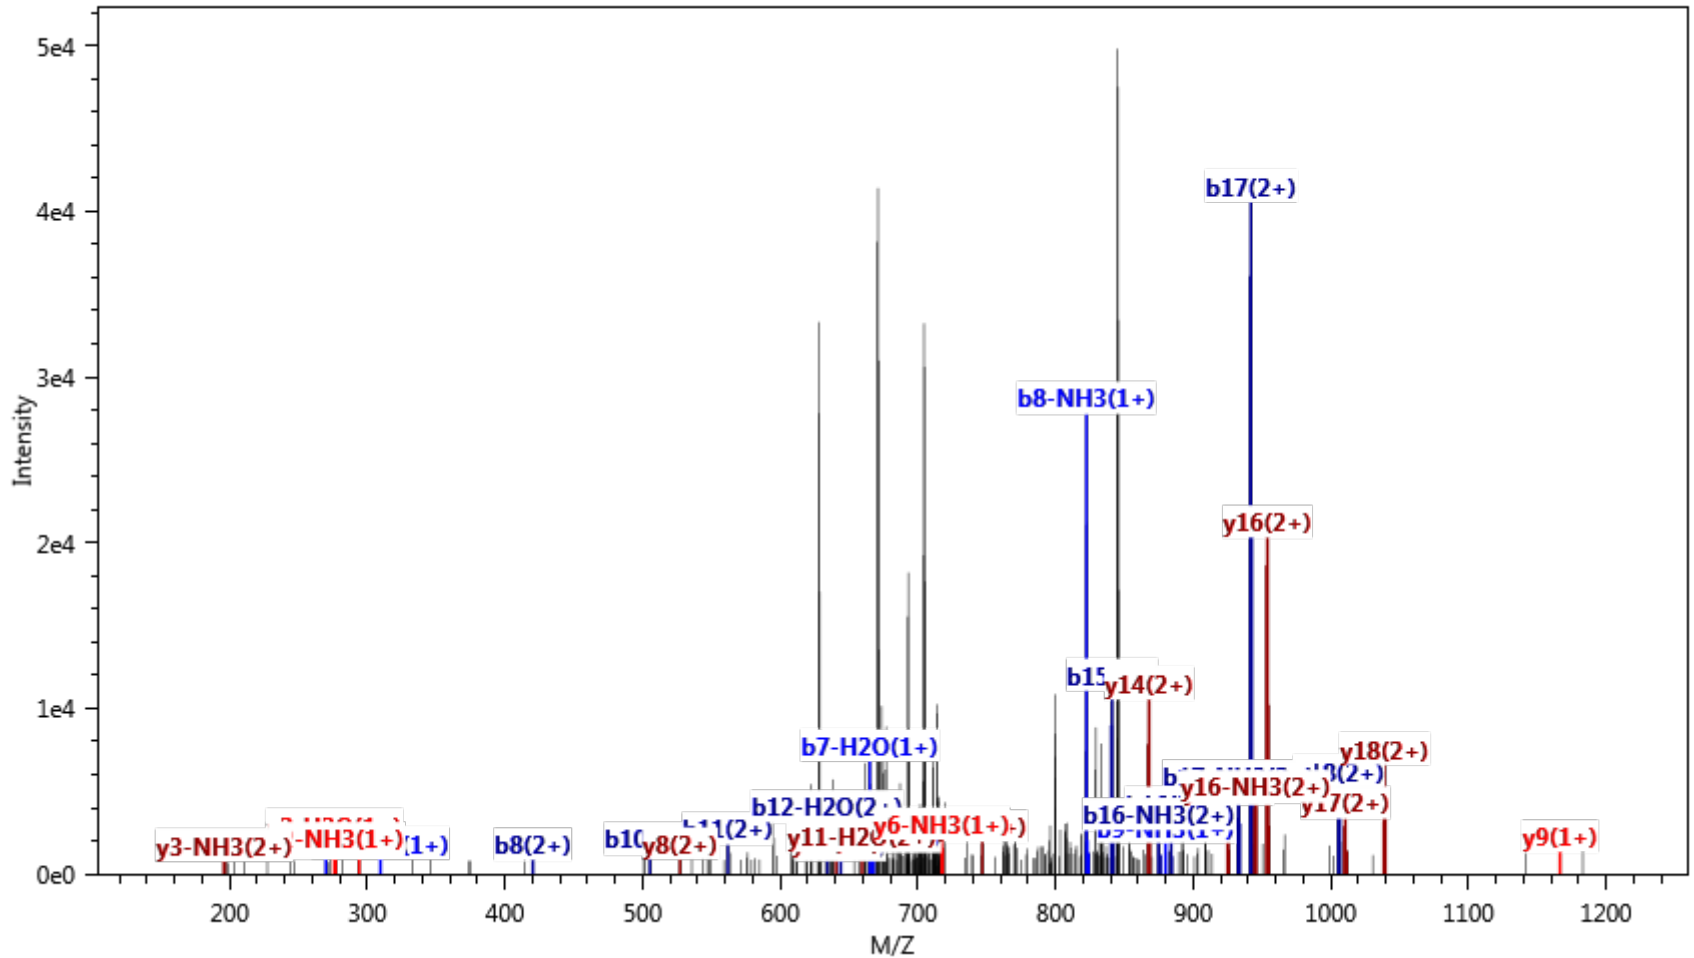



# FDANKDRFNH, charge 3

Ms2 Spectrum (Scan: 3219, Raw: CPTAC\_OT\_Pep\_JB\_5439\_30min\_4May12\_Legolas\_11-07-64)

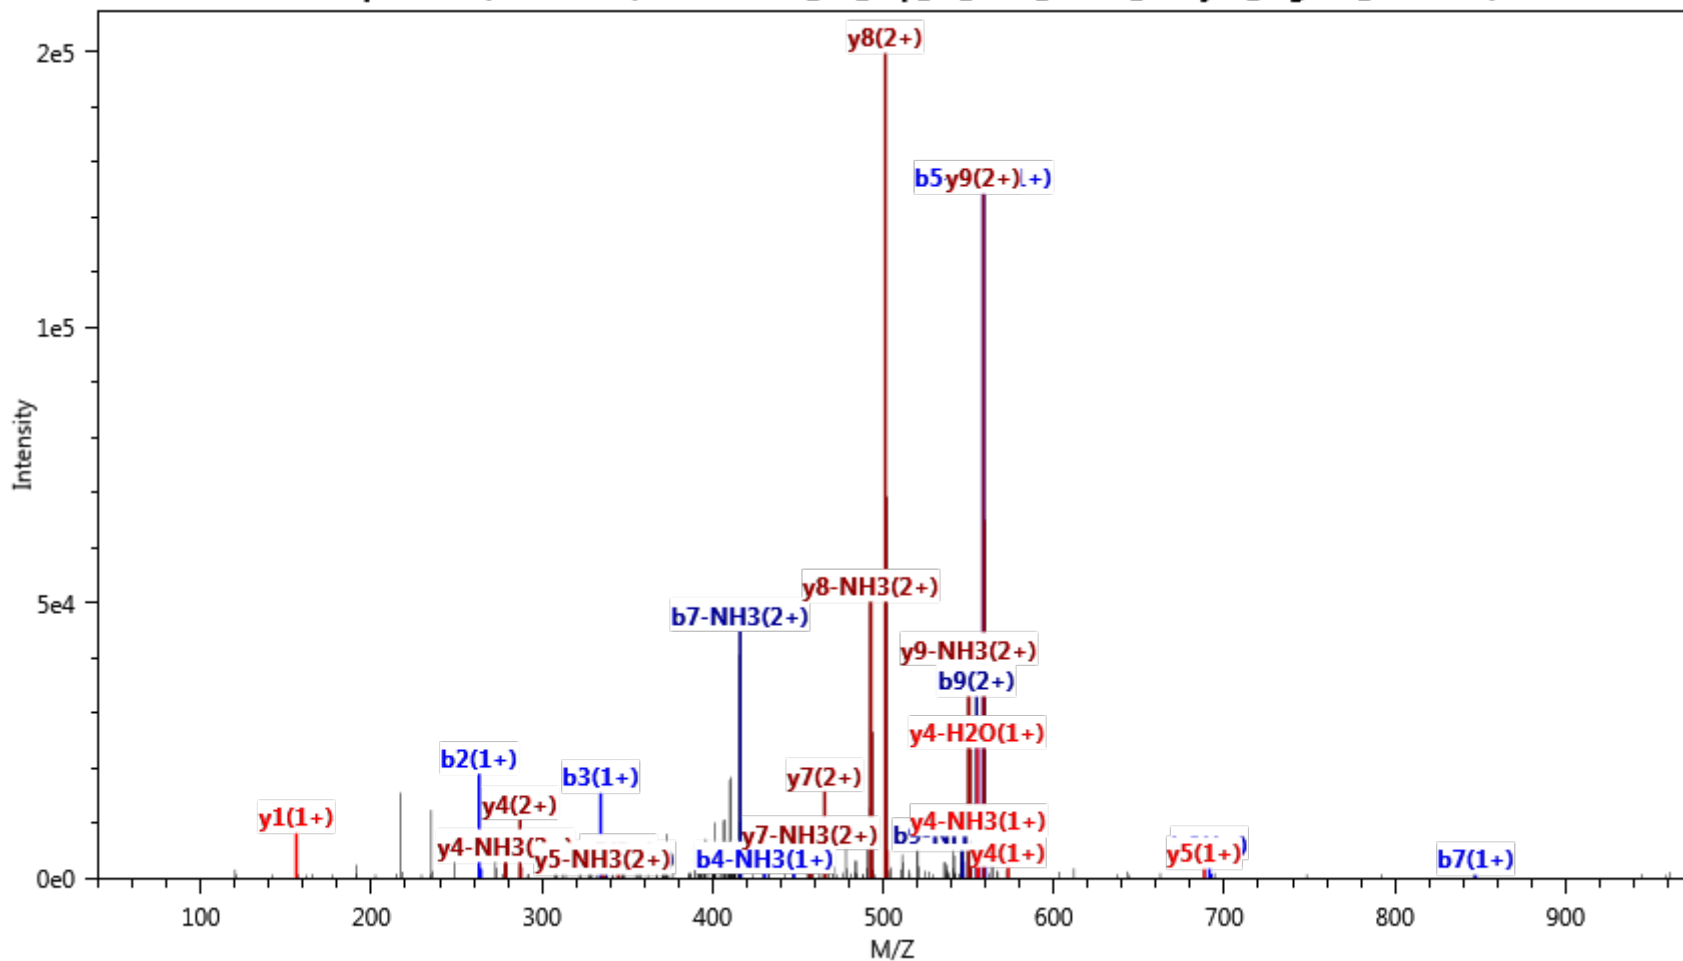

# YHAFSGAQKAETAANRICKVL, charge 4

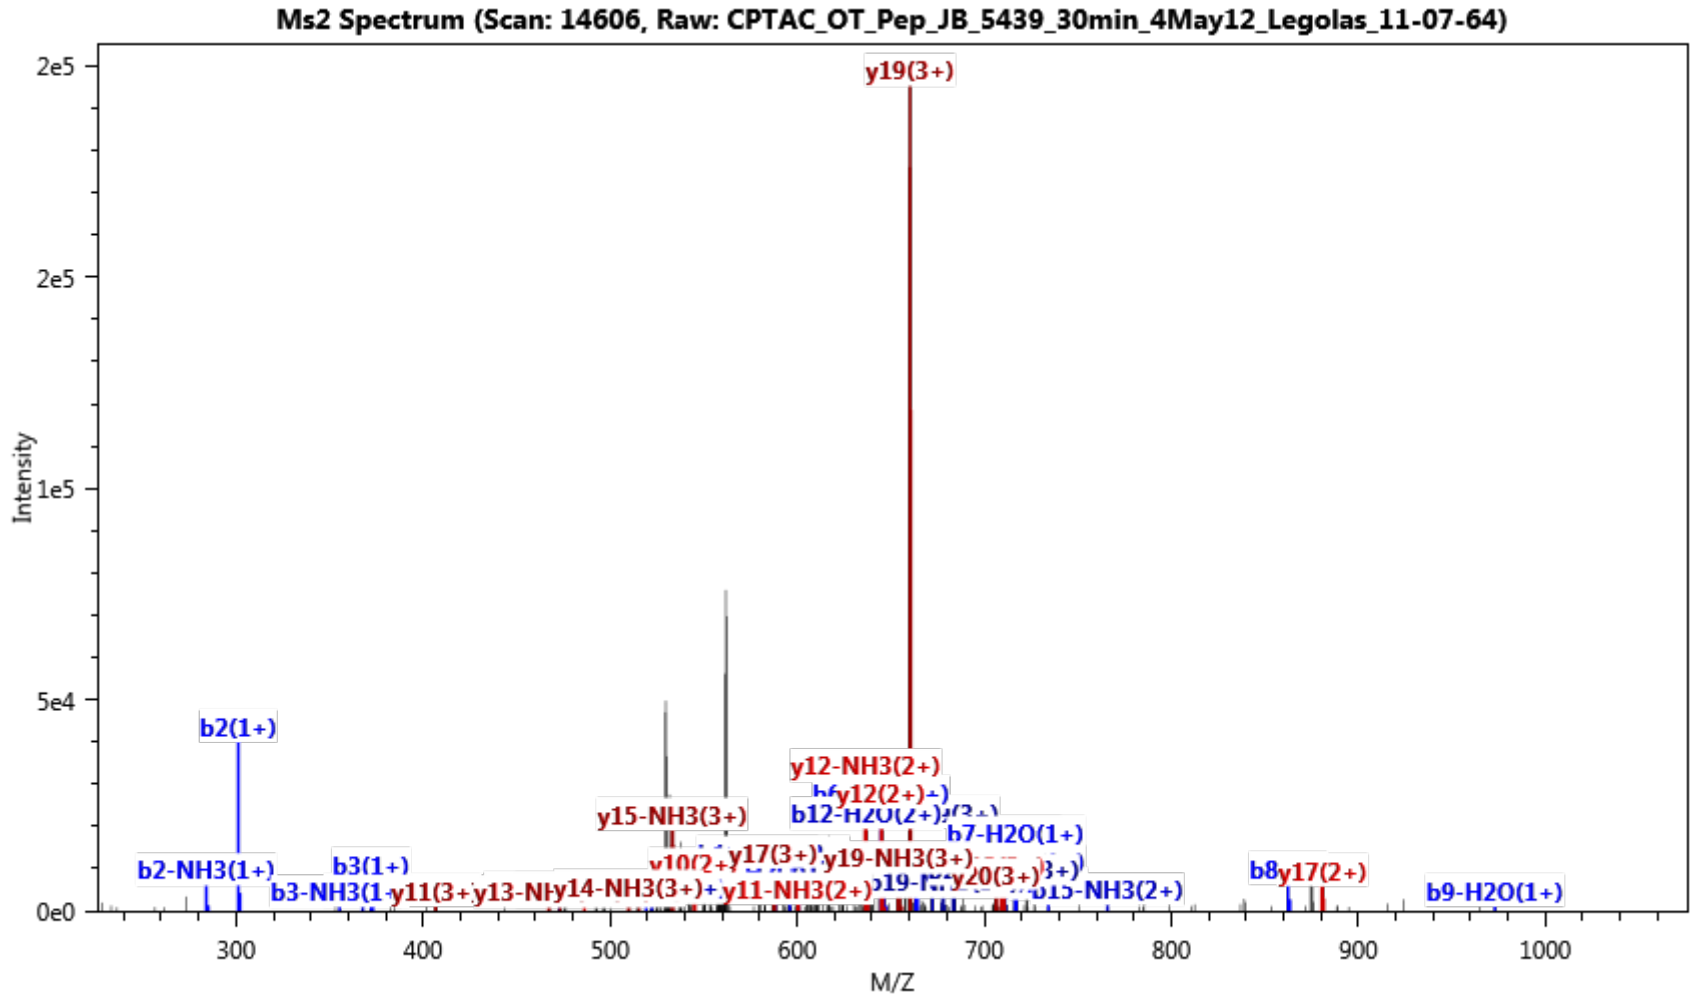

# VAGDDKYGRKIIV, charge 3

Ms2 Spectrum (Scan: 7236, Raw: CPTAC\_OT\_Pep\_JB\_5439\_30min\_4May12\_Legolas\_11-07-64)

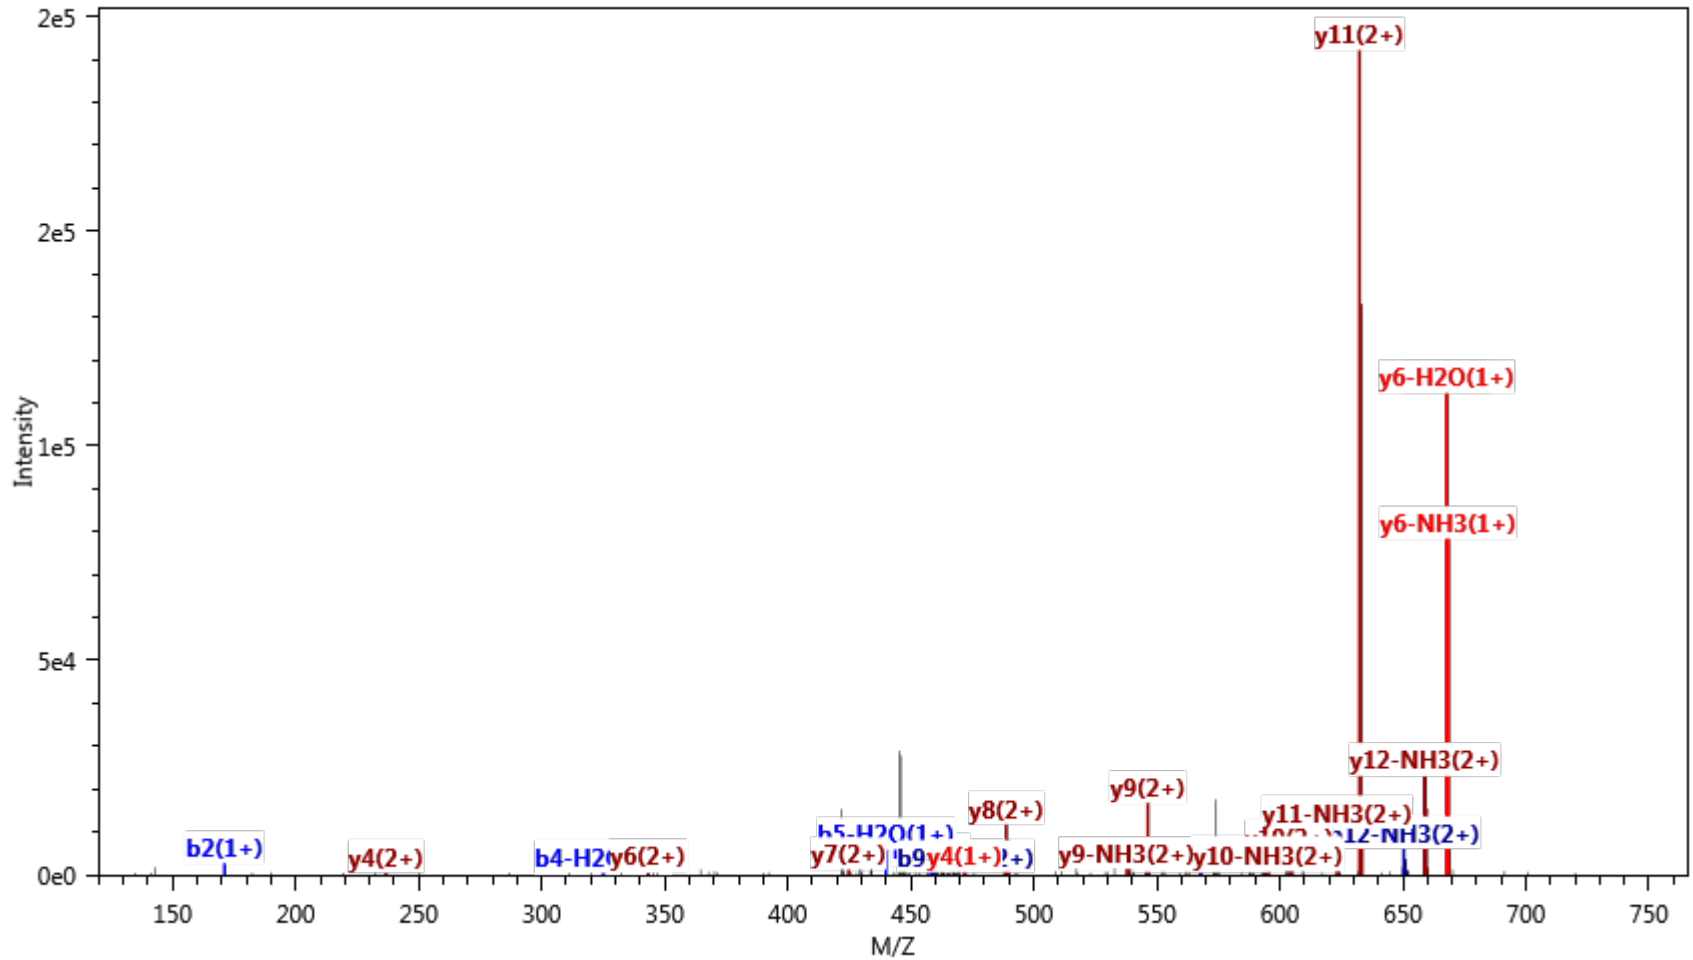

# M\*DTRLPGILRK, charge 3

Ms2 Spectrum (Scan: 3755, Raw: CPTAC\_OT\_Pep\_JB\_5439\_30min\_4May12\_Legolas\_11-07-64)

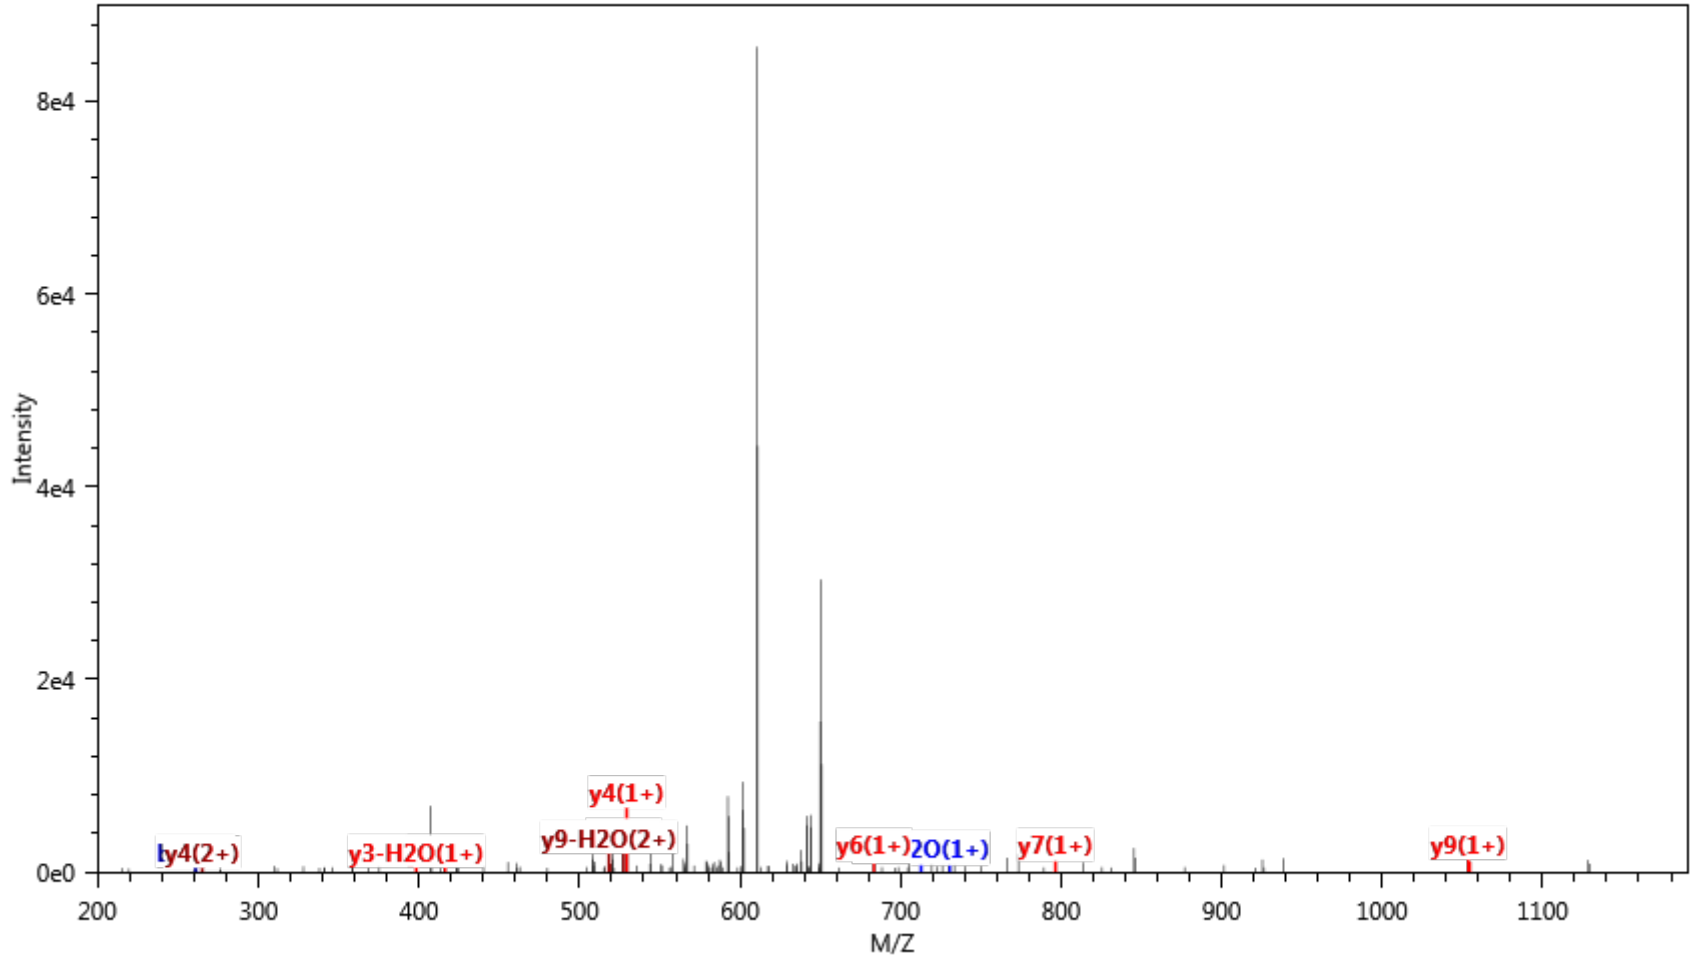

# FTSVQKRAIRTLWT, charge 3

Ms2 Spectrum (Scan: 12583, Raw: CPTAC\_OT\_Pep\_JB\_5439\_30min\_4May12\_Legolas\_11-07-64)

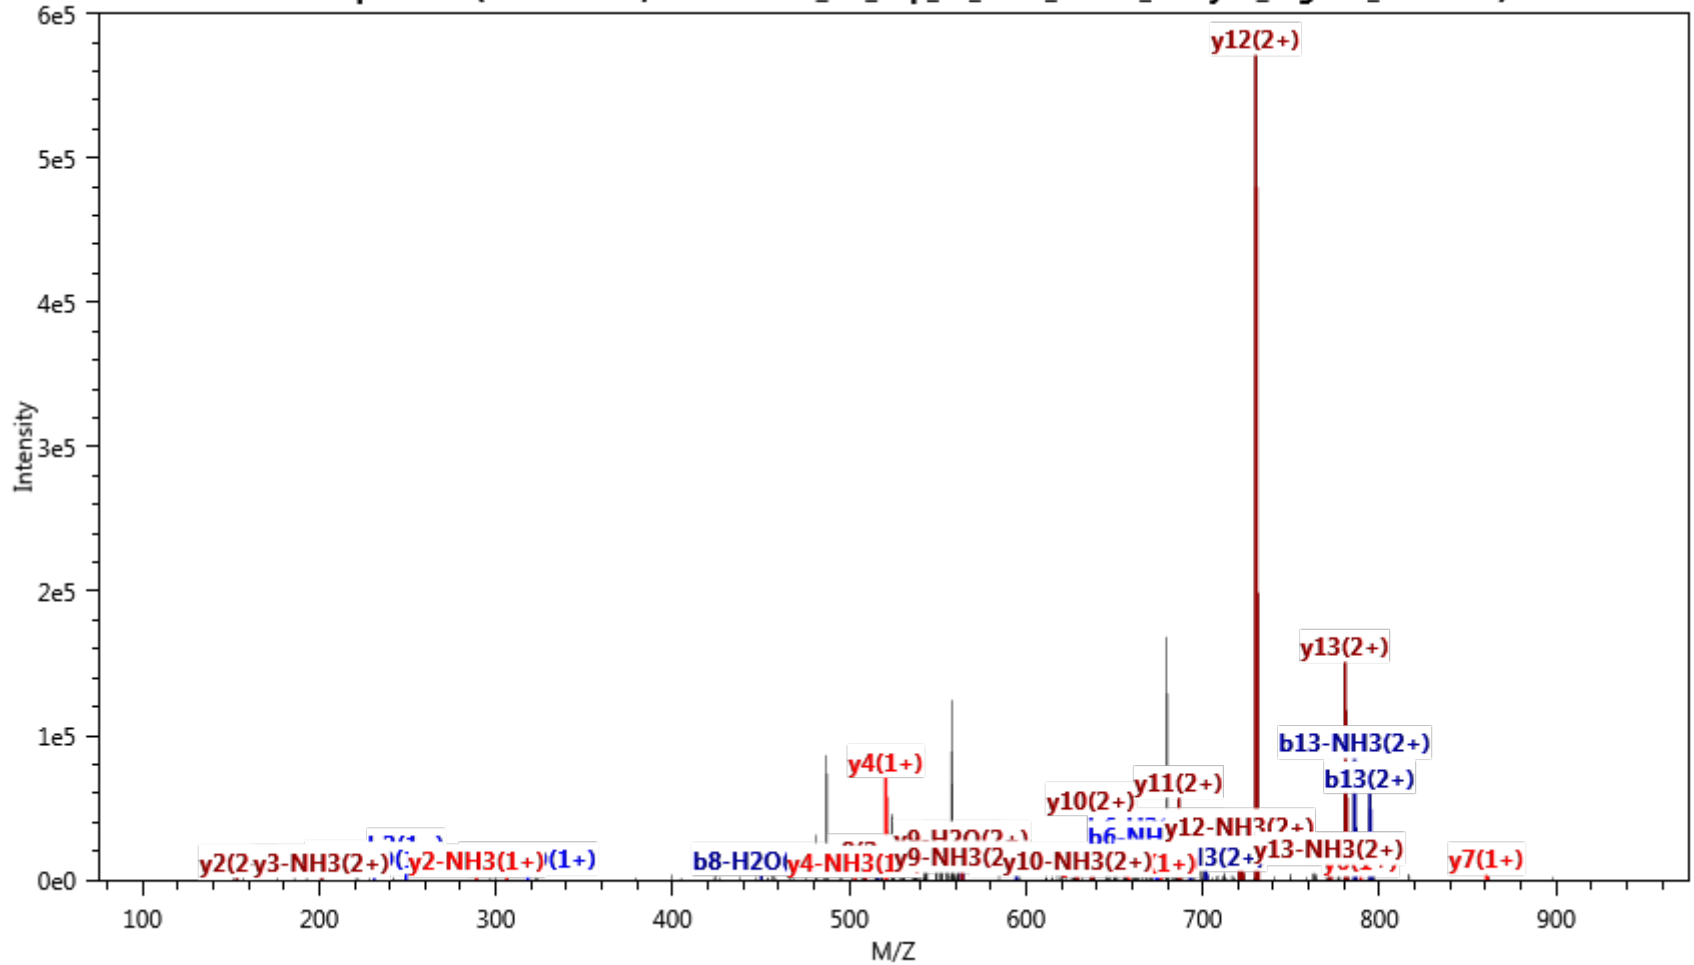

# LDKYLIPNATQPESK, charge 3

Ms2 Spectrum (Scan: 9434, Raw: CPTAC\_OT\_Pep\_JB\_5439\_5min\_4May12\_Legolas\_11-07-64)

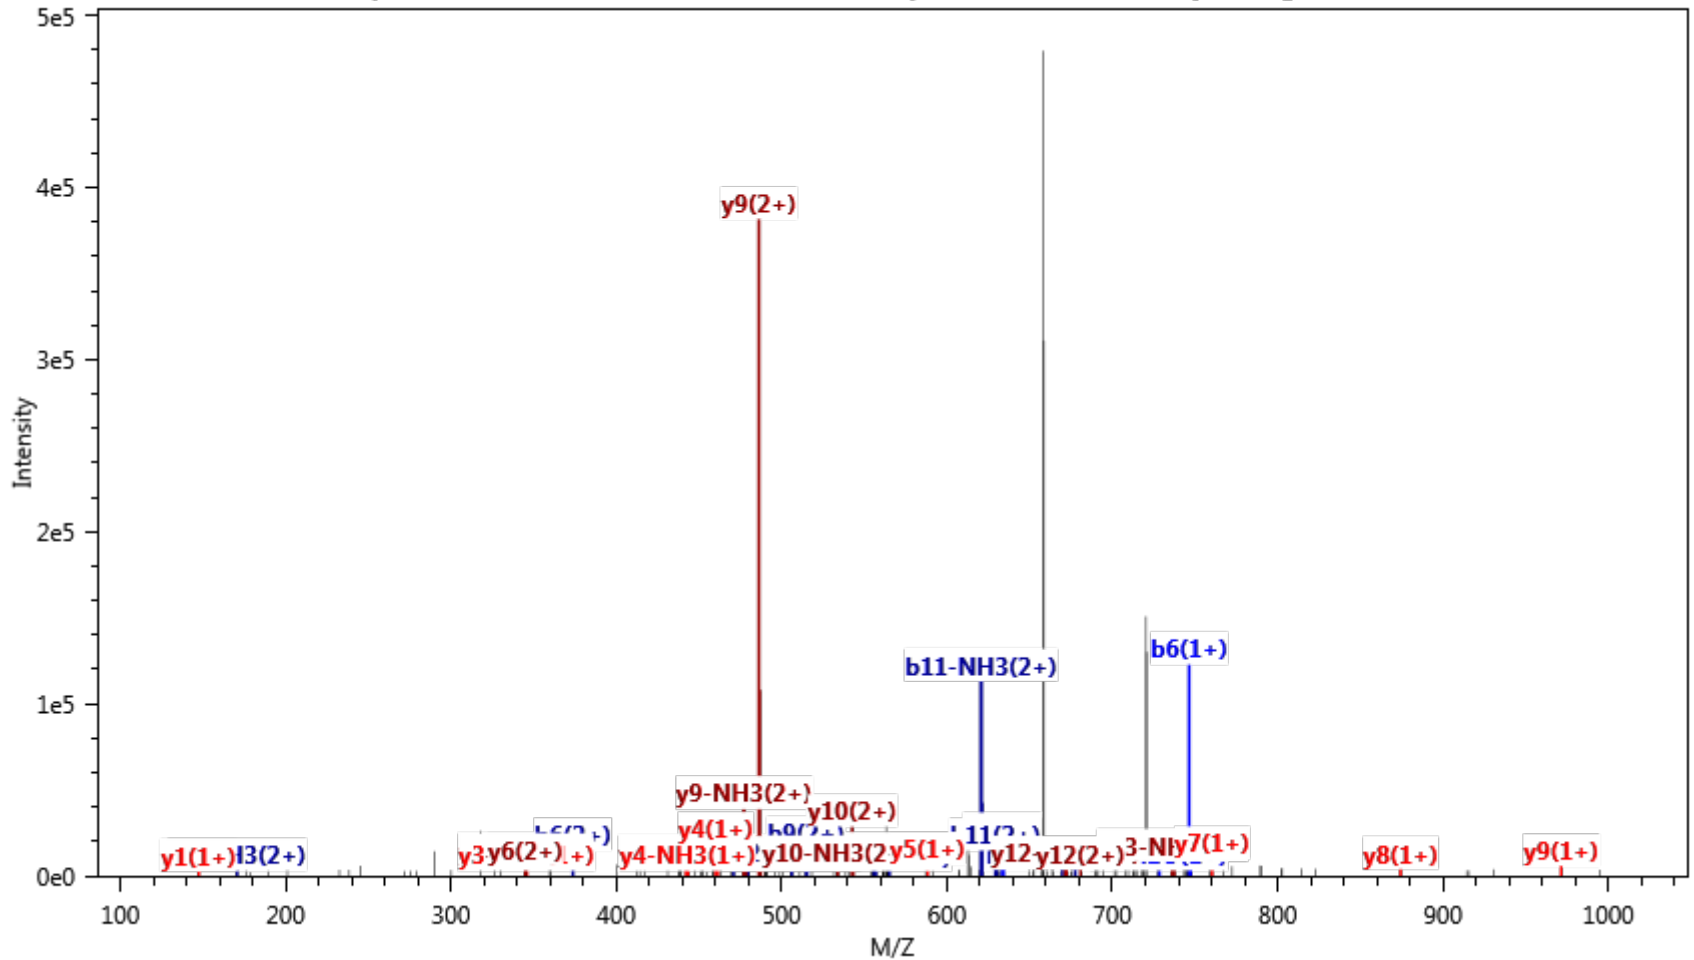

# YENLKGVLGFKKNEEALKK, charge 3

Ms2 Spectrum (Scan: 18791, Raw: CPTAC\_OT\_Pep\_JB\_5439\_60min\_4May12\_Legolas\_11-07-64)

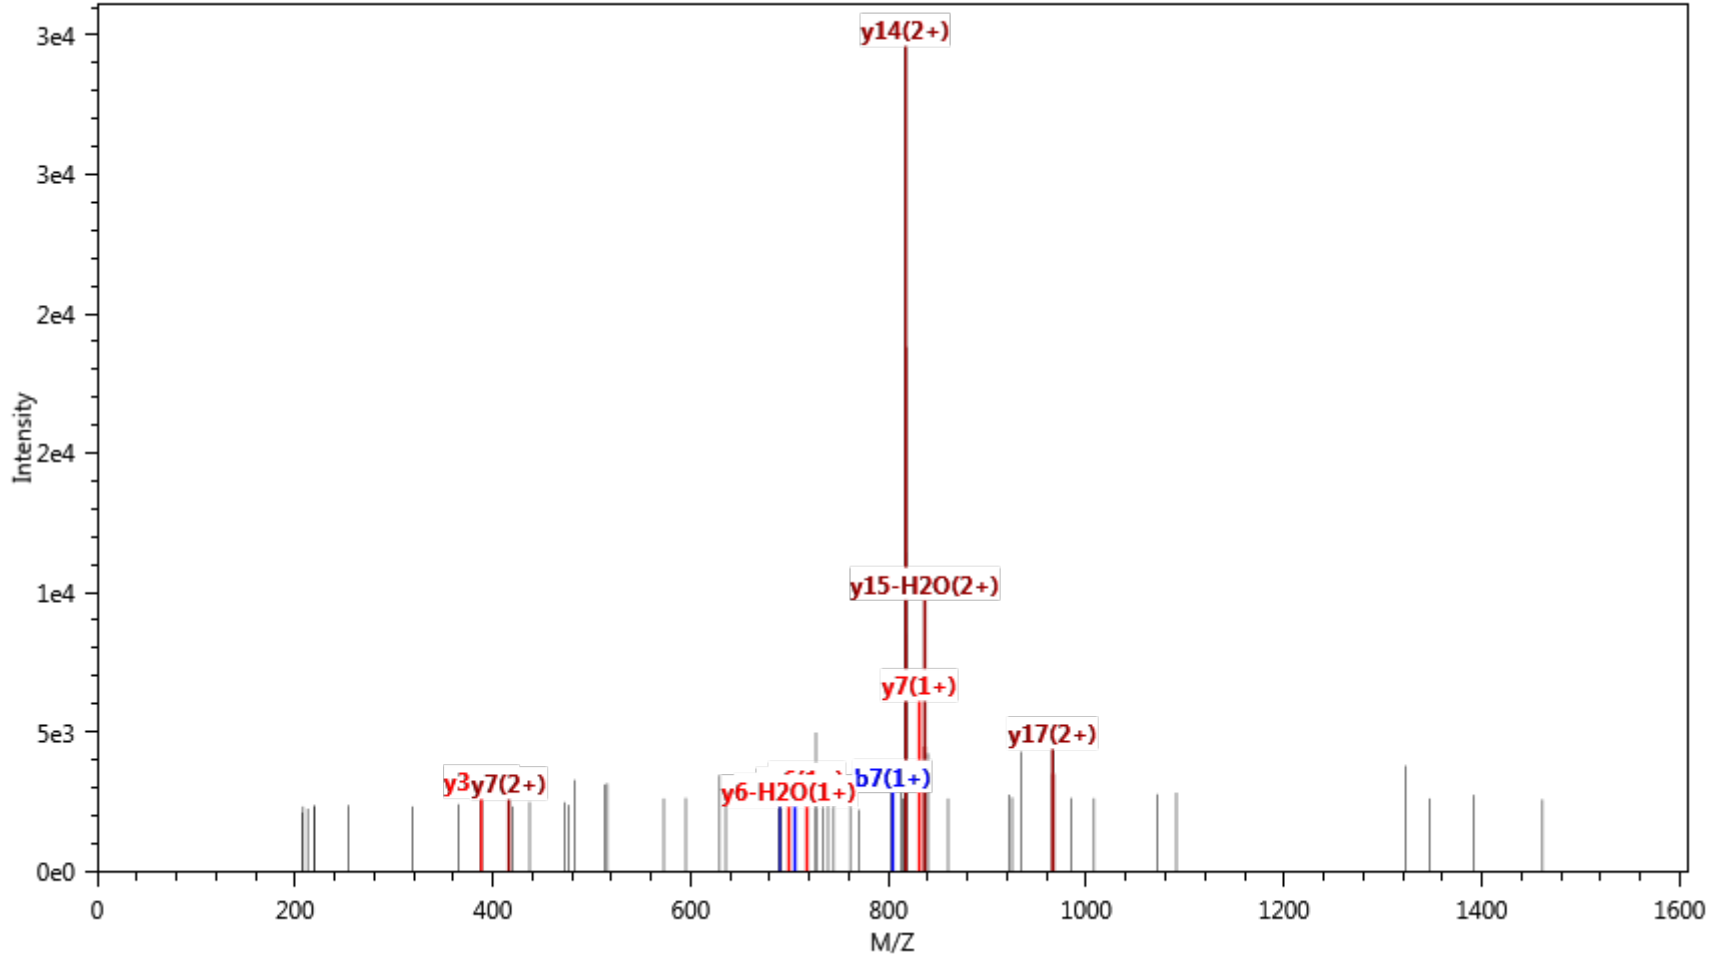

# SKFRMSELSSSR, charge 2

Ms2 Spectrum (Scan: 2039, Raw: CPTAC\_OT\_Pep\_JB\_5439\_60min\_4May12\_Legolas\_11-07-64)

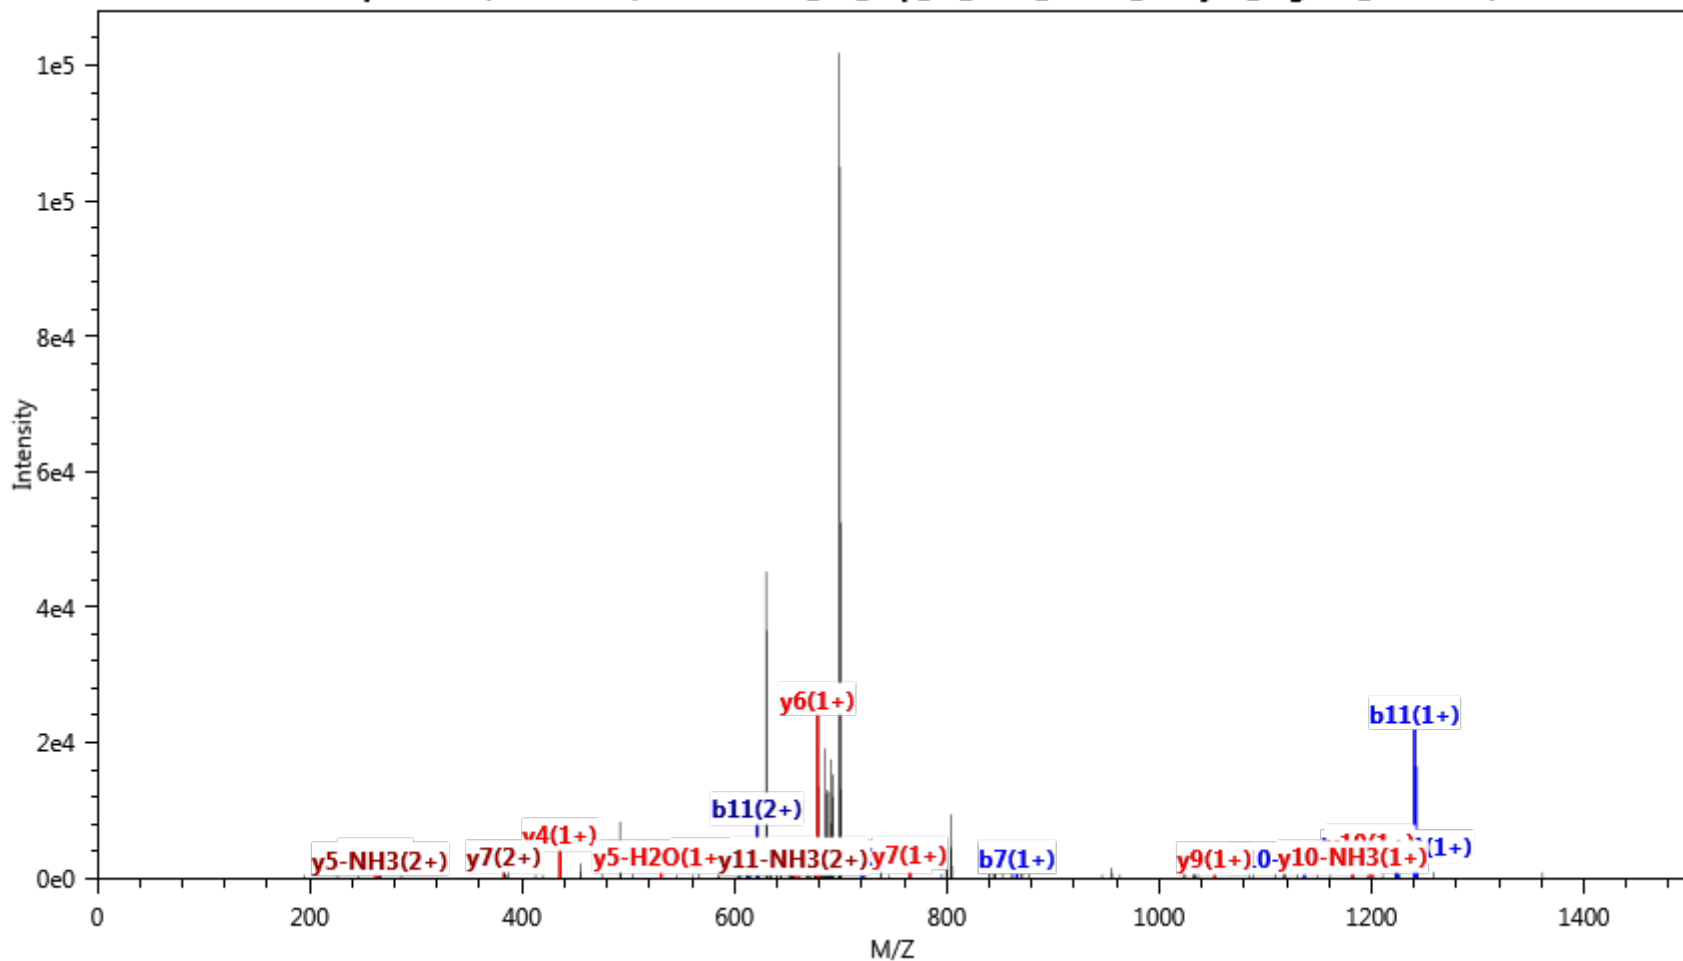



# VHLTPEEKSAV, charge 2

Ms2 Spectrum (Scan: 4633, Raw: CPTAC\_OT\_Pep\_JB\_5439\_60min\_4May12\_Legolas\_11-07-64)

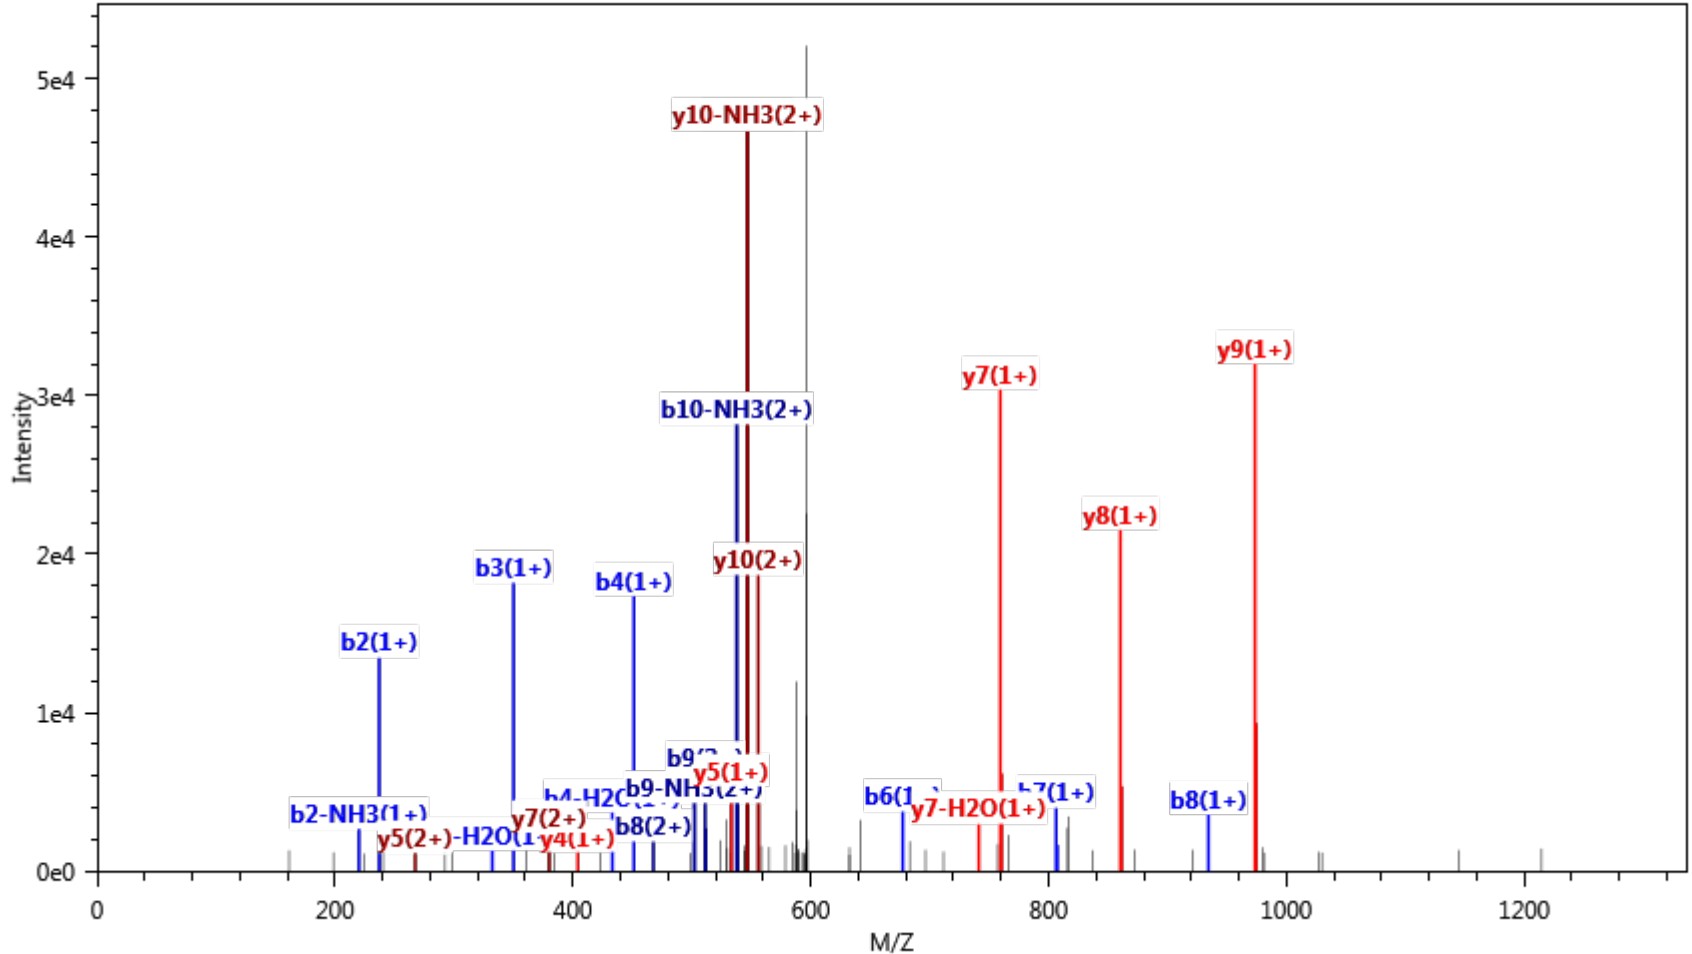

# TGKTFSSR, charge 2

Ms2 Spectrum (Scan: 2321, Raw: CPTAC\_OT\_Pep\_JB\_5439\_60min\_4May12\_Legolas\_11-07-64)

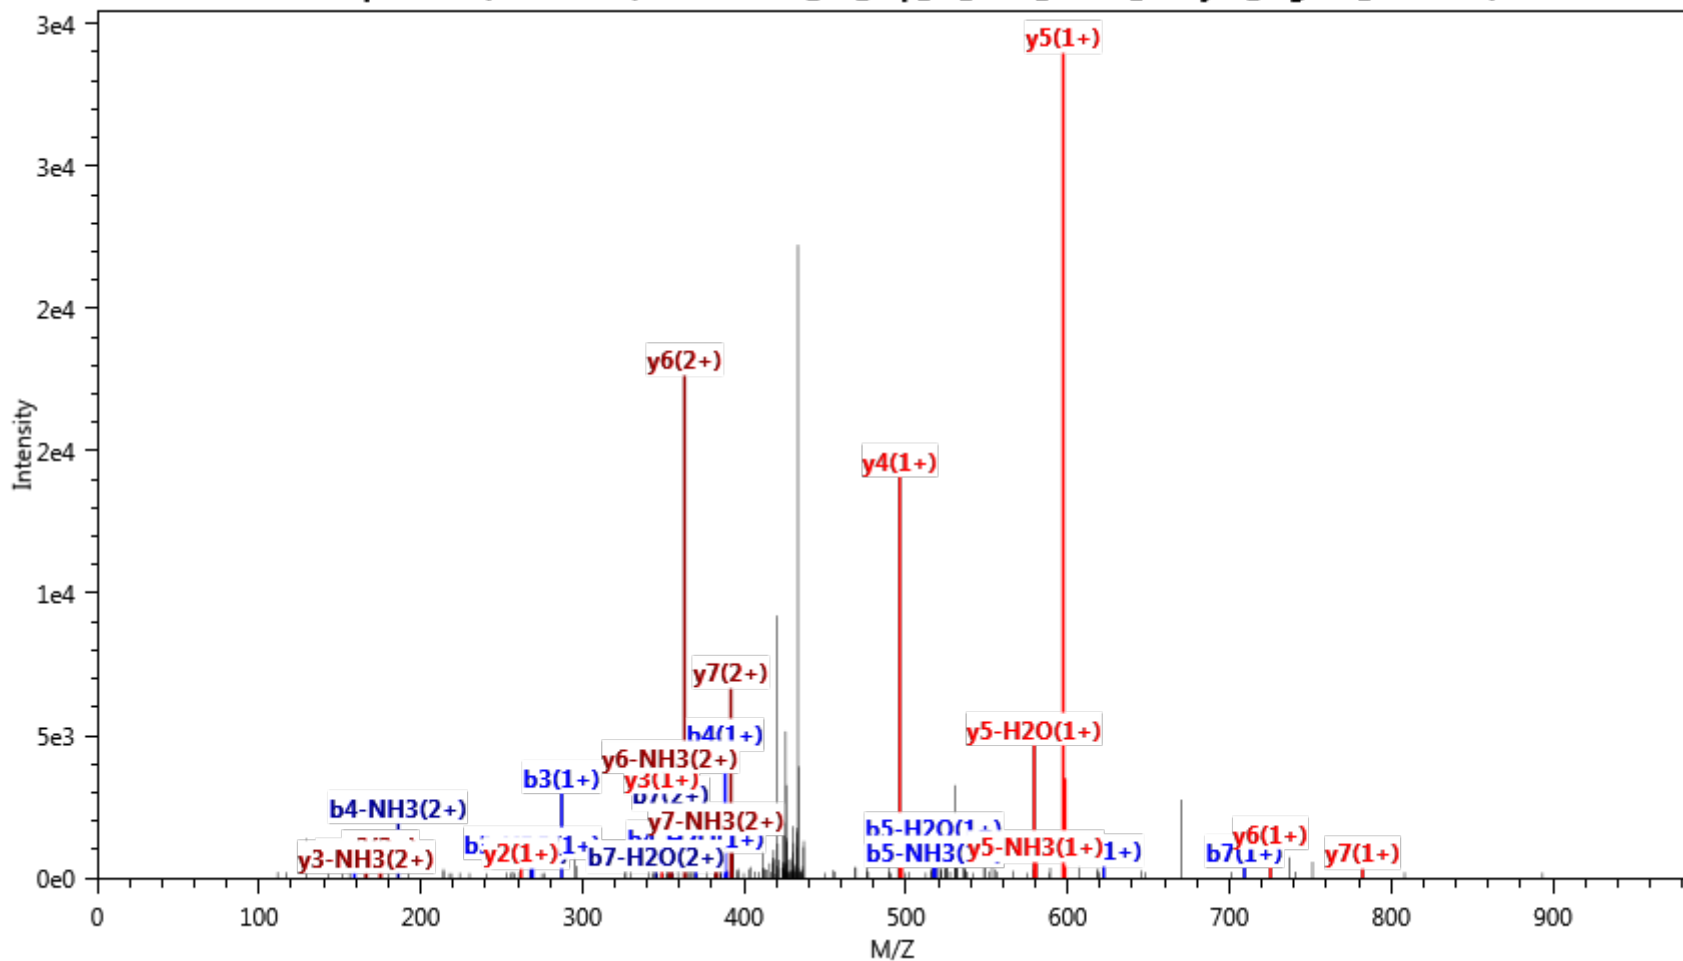

Supplement: NIHMS694939-supplement-13361_2015_1169_MOESM1_ESM.pdf [file NIHMS694939-supplement-13361_2015_1169_MOESM1_ESM.pdf]
